# Supplementary material for: Integrated approach with UHPLC-Q-Exactive-tandem mass spectrometry, network analysis, and molecular docking to determine potential active compounds and mechanisms of Rhizoma Musae decoction in osteoarthritis treatment
Source: Front Pharmacol. 2025 Jan 2;15:1380335. doi: 10.3389/fphar.2024.1380335 (PMC11735259; doi:10.3389/fphar.2024.1380335)
Supplement: Supplementary file 2 [file Table3.xlsx]

## Sheet: Table S3
Table S3. GO analysis entries.
ONTOLOGY	ID	Description	GeneRatio	BgRatio	pvalue	p.adjust	qvalue	geneID	Count
BP	GO:0070997	neuron death	33/103	368/18903	2.33e-31	9.47e-28	3.76e-28	GAPDH/AKT1/TNF/BCL2/JUN/CASP3/HIF1A/HSP90AB1/CCND1/TLR4/GSK3B/SIRT1/BCL2L1/JAK2/KDR/PARP1/APP/MCL1/CASP8/BRAF/ABL1/PPARA/HSPA5/CASP9/NR3C1/FYN/TERT/NTRK1/SNCA/GRIN2B/NTRK2/PTK2B/G6PD	33
BP	GO:0062197	cellular response to chemical stress	31/103	345/18903	1.96e-29	3.99e-26	1.58e-26	AKT1/TNF/IL6/SRC/EGFR/BCL2/JUN/CASP3/HIF1A/MAPK3/PTGS2/MMP9/MTOR/TLR4/MAPK1/SIRT1/JAK2/RELA/PARP1/EZH2/MCL1/ABL1/MAPK8/CASP1/FYN/NFE2L2/CDK1/MPO/SNCA/GSR/G6PD	31
BP	GO:0006979	response to oxidative stress	33/103	434/18903	5.32e-29	7.22e-26	2.86e-26	AKT1/TNF/IL6/SRC/EGFR/BCL2/JUN/CASP3/HIF1A/MAPK3/PTGS2/MMP9/TLR4/MAPK1/SIRT1/JAK2/RELA/PARP1/APP/EZH2/MCL1/ABL1/MAPK8/PDGFRB/FYN/NFE2L2/CDK1/MPO/SNCA/PTGS1/GSR/PTK2B/G6PD	33
BP	GO:1901214	regulation of neuron death	30/103	325/18903	8.11e-29	8.25e-26	3.27e-26	AKT1/TNF/BCL2/JUN/CASP3/HIF1A/HSP90AB1/CCND1/TLR4/GSK3B/SIRT1/BCL2L1/JAK2/KDR/PARP1/MCL1/CASP8/BRAF/ABL1/PPARA/CASP9/NR3C1/FYN/TERT/NTRK1/SNCA/GRIN2B/NTRK2/PTK2B/G6PD	30
BP	GO:0034599	cellular response to oxidative stress	27/103	288/18903	4.35e-26	3.54e-23	1.4e-23	AKT1/TNF/IL6/SRC/EGFR/BCL2/JUN/HIF1A/MAPK3/MMP9/TLR4/MAPK1/SIRT1/JAK2/RELA/PARP1/EZH2/MCL1/ABL1/MAPK8/FYN/NFE2L2/CDK1/MPO/SNCA/GSR/G6PD	27
BP	GO:0010038	response to metal ion	28/103	360/18903	8.56e-25	5.81e-22	2.3e-22	AKT1/EGFR/BCL2/JUN/CASP3/HIF1A/MAPK3/PTGS2/MMP9/CCND1/MAPK1/PARP1/APP/CASP8/BRAF/MAPK8/HSPA5/CASP9/NFE2L2/CDK1/TERT/SNCA/DRD2/MAOB/PTK2B/CYP1A2/G6PD/CALM1	28
BP	GO:0051402	neuron apoptotic process	25/103	255/18903	1.2e-24	7e-22	2.77e-22	GAPDH/TNF/BCL2/JUN/CASP3/HIF1A/HSP90AB1/CCND1/BCL2L1/JAK2/KDR/PARP1/APP/MCL1/BRAF/ABL1/HSPA5/CASP9/NR3C1/TERT/NTRK1/SNCA/NTRK2/PTK2B/G6PD	25
BP	GO:0009314	response to radiation	29/103	452/18903	2.6e-23	1.32e-20	5.25e-21	AKT1/TNF/EGFR/BCL2/CASP3/HIF1A/PTGS2/MMP9/CCND1/SIRT1/EP300/MDM2/BCL2L1/RELA/PARP1/GRB2/APP/PTPRC/MAPK14/BRAF/CREBBP/ITGB1/MAPK8/HSPA5/CASP9/HMGCR/NTRK1/DRD2/OPRM1	29
BP	GO:0032496	response to lipopolysaccharide	26/103	339/18903	7.33e-23	3.31e-20	1.31e-20	AKT1/TNF/IL6/SRC/CASP3/MAPK3/PTGS2/TLR4/MAPK1/JAK2/RELA/NFKBIA/MAPK14/CASP8/CDK4/ABL1/MAPK8/CASP9/PRKCA/ACE/CASP1/REN/MPO/SNCA/MAOB/OPRM1	26
BP	GO:0000302	response to reactive oxygen species	22/103	204/18903	1.2e-22	4.88e-20	1.94e-20	AKT1/IL6/SRC/EGFR/BCL2/JUN/CASP3/HIF1A/MAPK3/MMP9/MAPK1/SIRT1/RELA/EZH2/ABL1/MAPK8/PDGFRB/FYN/NFE2L2/CDK1/MPO/PTK2B	22
BP	GO:0002237	response to molecule of bacterial origin	26/103	360/18903	3.41e-22	1.2e-19	4.74e-20	AKT1/TNF/IL6/SRC/CASP3/MAPK3/PTGS2/TLR4/MAPK1/JAK2/RELA/NFKBIA/MAPK14/CASP8/CDK4/ABL1/MAPK8/CASP9/PRKCA/ACE/CASP1/REN/MPO/SNCA/MAOB/OPRM1	26
BP	GO:0033674	positive regulation of kinase activity	29/103	496/18903	3.53e-22	1.2e-19	4.74e-20	AKT1/TNF/SRC/EGFR/HSP90AA1/HSP90AB1/ERBB2/CCND1/MTOR/TLR4/SIRT1/JAK2/KDR/IL2/PTPRC/CDC42/FGF2/EZH2/ABL1/ACE/PDGFRB/NTRK1/SNCA/NTRK2/DRD2/PTK2B/ADRB2/CALM1/F2	29
BP	GO:0043523	regulation of neuron apoptotic process	22/103	218/18903	5.27e-22	1.65e-19	6.54e-20	TNF/BCL2/JUN/CASP3/HIF1A/HSP90AB1/CCND1/BCL2L1/JAK2/KDR/PARP1/MCL1/BRAF/ABL1/CASP9/NR3C1/TERT/NTRK1/SNCA/NTRK2/PTK2B/G6PD	22
BP	GO:0043410	positive regulation of MAPK cascade	28/103	496/18903	5.36e-21	1.56e-18	6.18e-19	TNF/IL6/SRC/EGFR/JUN/MAPK3/ERBB2/TLR4/JAK2/KDR/APP/PTPRC/CDC42/FGF2/EZH2/BRAF/ABL1/AR/PTPN11/PRKCA/PDGFRB/NTRK1/NTRK2/DRD2/PTK2B/XDH/ADRB2/OPRM1	28
BP	GO:0032103	positive regulation of response to external stimulus	27/103	464/18903	1.38e-20	3.75e-18	1.49e-18	TNF/IL6/SRC/HSP90AA1/MAPK3/PTGS2/TLR4/MAPK1/EP300/JAK2/KDR/IL2/NFKBIA/APP/FGF2/BRAF/CREBBP/PRKCA/ACE/CASP1/PDGFRB/FYN/AGTR1/SNCA/PTK2B/OPRM1/F2	27
BP	GO:0046777	protein autophosphorylation	21/103	226/18903	2.86e-20	7.28e-18	2.89e-18	AKT1/SRC/EGFR/JUN/MAPK3/ERBB2/MTOR/GSK3B/JAK2/KDR/PTPRC/PRKACA/ABL1/ACE/PDGFRB/FYN/AURKA/NTRK1/NTRK2/PTK2B/CALM1	21
BP	GO:0009410	response to xenobiotic stimulus	26/103	432/18903	3.43e-20	8.2e-18	3.25e-18	TNF/SRC/HSP90AA1/BCL2/JUN/CASP3/HSP90AB1/PTGS2/CCND1/BRAF/CDK4/ABL1/HSPA5/ACE/NFE2L2/CDK1/CYP3A4/REN/ABCB1/NTRK1/SNCA/DRD2/MAOB/PTK2B/CYP1A2/CYP2C9	26
BP	GO:0018105	peptidyl-serine phosphorylation	23/103	313/18903	7.87e-20	1.78e-17	7.06e-18	AKT1/TNF/IL6/SRC/EGFR/HSP90AA1/BCL2/HSP90AB1/PTGS2/MTOR/GSK3B/MAPK1/APP/MAPK14/PRKACA/BRAF/CDK2/MAPK8/PRKCA/CDK1/AURKA/SNCA/NTRK2	23
BP	GO:0030099	myeloid cell differentiation	25/103	407/18903	1.24e-19	2.65e-17	1.05e-17	TNF/SRC/STAT3/JUN/CASP3/HIF1A/PPARG/MMP9/MTOR/TLR4/SIRT1/EP300/JAK2/PARP1/NFKBIA/APP/CDC42/MAPK14/CASP8/PTPN11/CASP9/PRKCA/FASN/PTK2B/G6PD	25
BP	GO:0018209	peptidyl-serine modification	23/103	332/18903	2.96e-19	6.03e-17	2.39e-17	AKT1/TNF/IL6/SRC/EGFR/HSP90AA1/BCL2/HSP90AB1/PTGS2/MTOR/GSK3B/MAPK1/APP/MAPK14/PRKACA/BRAF/CDK2/MAPK8/PRKCA/CDK1/AURKA/SNCA/NTRK2	23
BP	GO:0048732	gland development	25/103	441/18903	8.49e-19	1.64e-16	6.52e-17	AKT1/TNF/IL6/SRC/EGFR/BCL2/JUN/ESR1/HIF1A/MAPK3/CCND1/MAPK1/JAK2/RELA/FGF2/EZH2/BRAF/ABL1/AR/NR3C1/FASN/AURKA/DRD2/CYP19A1/XDH	25
BP	GO:0051098	regulation of binding	23/103	372/18903	3.75e-18	6.93e-16	2.75e-16	AKT1/SRC/JUN/MAPK3/PPARG/HSP90AB1/MMP9/GSK3B/EP300/JAK2/PARP1/NFKBIA/APP/CDC42/PRKACA/ABL1/PPARA/MAPK8/ACE/TERT/AURKA/ADRB2/CALM1	23
BP	GO:0034614	cellular response to reactive oxygen species	17/103	150/18903	4.98e-18	8.81e-16	3.5e-16	AKT1/IL6/SRC/EGFR/JUN/MAPK3/MMP9/MAPK1/SIRT1/RELA/EZH2/ABL1/MAPK8/FYN/NFE2L2/CDK1/MPO	17
BP	GO:0070371	ERK1 and ERK2 cascade	22/103	340/18903	8.37e-18	1.42e-15	5.63e-16	TNF/SRC/EGFR/JUN/MAPK3/ERBB2/TLR4/MAPK1/KDR/APP/PTPRC/FGF2/BRAF/ABL1/PTPN11/PRKCA/PDGFRB/CDK1/NTRK1/DRD2/PTK2B/OPRM1	22
BP	GO:0070374	positive regulation of ERK1 and ERK2 cascade	19/103	223/18903	1.09e-17	1.78e-15	7.05e-16	TNF/SRC/EGFR/JUN/MAPK3/TLR4/KDR/APP/PTPRC/FGF2/BRAF/ABL1/PTPN11/PRKCA/PDGFRB/NTRK1/DRD2/PTK2B/OPRM1	19
BP	GO:0048511	rhythmic process	21/103	302/18903	1.17e-17	1.84e-15	7.28e-16	TNF/SRC/CASP3/ESR1/PPARG/MTOR/GSK3B/SIRT1/EP300/PARP1/EZH2/HDAC1/CREBBP/PPARA/MAPK8/HSPA5/CDK1/NTRK1/NTRK2/DRD2/OPRM1	21
BP	GO:0072593	reactive oxygen species metabolic process	19/103	235/18903	2.93e-17	4.42e-15	1.75e-15	TNF/BCL2/HIF1A/TLR4/GRB2/MAPK14/PPARA/PDGFRB/FYN/NFE2L2/MPO/AGTR1/SNCA/MAOB/PTK2B/CYP1A2/XDH/G6PD/F2	19
BP	GO:0045860	positive regulation of protein kinase activity	23/103	420/18903	5.43e-17	7.89e-15	3.13e-15	AKT1/TNF/SRC/EGFR/HSP90AA1/HSP90AB1/ERBB2/CCND1/MTOR/TLR4/SIRT1/JAK2/PTPRC/FGF2/EZH2/ABL1/ACE/PDGFRB/SNCA/DRD2/PTK2B/ADRB2/CALM1	23
BP	GO:0031667	response to nutrient levels	24/103	474/18903	6.14e-17	8.61e-15	3.42e-15	AKT1/TNF/SRC/BCL2/MAPK3/PPARG/PTGS2/CCND1/MTOR/MAPK1/SIRT1/MAPK14/PPARA/MAPK8/HSPA5/ACE/NFE2L2/MPO/NTRK1/RXRA/COMT/ADRB2/OPRM1/G6PD	24
BP	GO:0009612	response to mechanical stimulus	18/103	211/18903	8.3e-17	1.13e-14	4.47e-15	TNF/SRC/JUN/MAPK3/PTGS2/TLR4/RELA/NFKBIA/MAPK14/FGF2/CASP8/MAPK8/CASP1/FYN/MPO/NTRK1/DRD2/PTK2B	18
BP	GO:0070482	response to oxygen levels	21/103	337/18903	1.09e-16	1.43e-14	5.68e-15	AKT1/TNF/SRC/BCL2/CASP3/HIF1A/PPARG/PTGS2/MTOR/SIRT1/EP300/MDM2/CREBBP/PPARA/ACE/PDGFRB/NFE2L2/CCNA2/TERT/DRD2/PTK2B	21
BP	GO:2000377	regulation of reactive oxygen species metabolic process	16/103	149/18903	1.22e-16	1.52e-14	6.02e-15	TNF/BCL2/HIF1A/TLR4/GRB2/MAPK14/PPARA/PDGFRB/FYN/NFE2L2/AGTR1/SNCA/PTK2B/XDH/G6PD/F2	16
BP	GO:0048545	response to steroid hormone	21/103	339/18903	1.23e-16	1.52e-14	6.02e-15	TNF/IL6/SRC/BCL2/CASP3/ESR1/PTGS2/CCND1/SIRT1/EP300/JAK2/PARP1/HDAC1/AR/PPARA/CASP9/ACE/NR3C1/ESR2/MAOB/RXRA	21
BP	GO:1901215	negative regulation of neuron death	18/103	218/18903	1.49e-16	1.78e-14	7.05e-15	AKT1/BCL2/JUN/HIF1A/HSP90AB1/CCND1/GSK3B/SIRT1/BCL2L1/JAK2/KDR/BRAF/PPARA/TERT/NTRK1/SNCA/NTRK2/PTK2B	18
BP	GO:0071900	regulation of protein serine/threonine kinase activity	22/103	395/18903	1.99e-16	2.31e-14	9.17e-15	AKT1/TNF/SRC/EGFR/CASP3/PPARG/HSP90AB1/ERBB2/CCND1/TLR4/SIRT1/PTPRC/FGF2/EZH2/ABL1/PDGFRB/CCNA2/HMGCR/SNCA/PTK2B/ADRB2/CALM1	22
BP	GO:1903829	positive regulation of protein localization	23/103	451/18903	2.56e-16	2.9e-14	1.15e-14	AKT1/TNF/SRC/EGFR/HSP90AA1/HIF1A/PPARG/HSP90AB1/PTGS2/ERBB2/TLR4/GSK3B/JAK2/PARP1/MAPK14/PRKACA/ITGB1/MAPK8/FYN/CDK1/TERT/LGALS3/F2	23
BP	GO:0036293	response to decreased oxygen levels	20/103	309/18903	3.05e-16	3.35e-14	1.33e-14	AKT1/TNF/SRC/BCL2/CASP3/HIF1A/PPARG/PTGS2/MTOR/SIRT1/EP300/MDM2/CREBBP/PPARA/ACE/NFE2L2/CCNA2/TERT/DRD2/PTK2B	20
BP	GO:0070372	regulation of ERK1 and ERK2 cascade	20/103	315/18903	4.42e-16	4.73e-14	1.88e-14	TNF/SRC/EGFR/JUN/MAPK3/ERBB2/TLR4/KDR/APP/PTPRC/FGF2/BRAF/ABL1/PTPN11/PRKCA/PDGFRB/NTRK1/DRD2/PTK2B/OPRM1	20
BP	GO:2001234	negative regulation of apoptotic signaling pathway	18/103	233/18903	4.84e-16	5.05e-14	2e-14	AKT1/TNF/SRC/BCL2/HIF1A/PTGS2/MMP9/GSK3B/SIRT1/MDM2/BCL2L1/RELA/HDAC1/MCL1/AR/NFE2L2/TERT/LGALS3	18
BP	GO:0050727	regulation of inflammatory response	22/103	414/18903	5.31e-16	5.4e-14	2.14e-14	TNF/IL6/SRC/ESR1/PPARG/PTGS2/MMP9/TLR4/JAK2/IL2/RELA/NFKBIA/APP/PTPRC/MAPK14/PPARA/ACE/CASP1/FYN/AGTR1/SNCA/CYP19A1	22
BP	GO:0009416	response to light stimulus	20/103	321/18903	6.36e-16	6.31e-14	2.5e-14	AKT1/EGFR/BCL2/CASP3/HIF1A/PTGS2/MMP9/CCND1/SIRT1/EP300/RELA/PARP1/APP/BRAF/CREBBP/ITGB1/MAPK8/CASP9/HMGCR/DRD2	20
BP	GO:0043393	regulation of protein binding	17/103	200/18903	6.8e-16	6.59e-14	2.61e-14	AKT1/SRC/MAPK3/HSP90AB1/MMP9/GSK3B/EP300/APP/CDC42/PRKACA/ABL1/PPARA/MAPK8/ACE/TERT/AURKA/ADRB2	17
BP	GO:0045862	positive regulation of proteolysis	21/103	372/18903	7.98e-16	7.55e-14	2.99e-14	AKT1/TNF/SRC/STAT3/PPARG/GSK3B/SIRT1/MDM2/JAK2/APP/CASP8/CASP9/CASP1/FYN/NFE2L2/AURKA/SNCA/GRIN2B/PTK2B/VCP/XDH	21
BP	GO:1901653	cellular response to peptide	21/103	373/18903	8.42e-16	7.78e-14	3.09e-14	AKT1/TNF/SRC/STAT3/PPARG/TLR4/GSK3B/SIRT1/MDM2/JAK2/RELA/PARP1/GRB2/APP/CDK4/PTPN11/FYN/NFE2L2/CCNA2/AGTR1/ADRB2	21
BP	GO:2001233	regulation of apoptotic signaling pathway	21/103	374/18903	8.88e-16	8.03e-14	3.18e-14	AKT1/TNF/SRC/BCL2/HIF1A/PTGS2/MMP9/GSK3B/SIRT1/MDM2/BCL2L1/JAK2/RELA/PARP1/PTPRC/HDAC1/MCL1/AR/NFE2L2/TERT/LGALS3	21
BP	GO:0050673	epithelial cell proliferation	23/103	481/18903	1.03e-15	9.13e-14	3.62e-14	AKT1/TNF/IL6/EGFR/STAT3/JUN/ESR1/HIF1A/PPARG/ERBB2/CCND1/MAPK1/SIRT1/BCL2L1/KDR/CDC42/FGF2/CDK4/AR/PRKCA/AGTR1/DRD2/XDH	23
BP	GO:0071214	cellular response to abiotic stimulus	20/103	335/18903	1.44e-15	1.22e-13	4.85e-14	CASP3/MAPK3/PTGS2/MMP9/MTOR/TLR4/SIRT1/EP300/MDM2/BCL2L1/PARP1/GRB2/MAPK14/FGF2/CASP8/CREBBP/MAPK8/HSPA5/CASP9/CASP1	20
BP	GO:0104004	cellular response to environmental stimulus	20/103	335/18903	1.44e-15	1.22e-13	4.85e-14	CASP3/MAPK3/PTGS2/MMP9/MTOR/TLR4/SIRT1/EP300/MDM2/BCL2L1/PARP1/GRB2/MAPK14/FGF2/CASP8/CREBBP/MAPK8/HSPA5/CASP9/CASP1	20
BP	GO:0097305	response to alcohol	18/103	253/18903	2.06e-15	1.71e-13	6.8e-14	AKT1/TNF/CCND1/BCL2L1/IL2/PARP1/CASP8/CDK4/PPARA/ACE/FYN/CDK1/GRIN2B/DRD2/MAOB/PTK2B/OPRM1/G6PD	18
BP	GO:0001666	response to hypoxia	19/103	296/18903	2.12e-15	1.72e-13	6.84e-14	TNF/SRC/BCL2/CASP3/HIF1A/PPARG/PTGS2/MTOR/SIRT1/EP300/MDM2/CREBBP/PPARA/ACE/NFE2L2/CCNA2/TERT/DRD2/PTK2B	19
BP	GO:1901216	positive regulation of neuron death	13/103	91/18903	2.31e-15	1.84e-13	7.3e-14	TNF/CASP3/TLR4/GSK3B/PARP1/MCL1/CASP8/ABL1/CASP9/NR3C1/FYN/SNCA/GRIN2B	13
BP	GO:0097193	intrinsic apoptotic signaling pathway	19/103	298/18903	2.4e-15	1.88e-13	7.44e-14	AKT1/TNF/SRC/BCL2/CASP3/HIF1A/PTGS2/MMP9/SIRT1/EP300/MDM2/BCL2L1/JAK2/PARP1/HDAC1/MCL1/ABL1/CASP9/NFE2L2	19
BP	GO:0071216	cellular response to biotic stimulus	18/103	261/18903	3.56e-15	2.73e-13	1.08e-13	AKT1/TNF/IL6/SRC/MAPK3/TLR4/GSK3B/MAPK1/JAK2/RELA/NFKBIA/MAPK14/CDK4/ABL1/MAPK8/HSPA5/PRKCA/CASP1	18
BP	GO:0042063	gliogenesis	19/103	310/18903	4.93e-15	3.67e-13	1.46e-13	AKT1/TNF/IL6/STAT3/MAPK3/ERBB2/MTOR/TLR4/MAPK1/APP/FGF2/EZH2/HDAC1/ABL1/PTPN11/CDK1/NTRK2/PTK2B/F2	19
BP	GO:0030522	intracellular receptor signaling pathway	18/103	266/18903	4.96e-15	3.67e-13	1.46e-13	SRC/STAT3/ESR1/PPARG/TLR4/SIRT1/EP300/JAK2/RELA/PARP1/NFKBIA/EZH2/HDAC1/AR/PPARA/NR3C1/ESR2/RXRA	18
BP	GO:0010001	glial cell differentiation	17/103	227/18903	5.67e-15	4.12e-13	1.63e-13	AKT1/TNF/IL6/STAT3/MAPK3/ERBB2/MTOR/TLR4/MAPK1/APP/FGF2/HDAC1/ABL1/PTPN11/CDK1/NTRK2/F2	17
BP	GO:0048661	positive regulation of smooth muscle cell proliferation	13/103	98/18903	6.27e-15	4.47e-13	1.77e-13	AKT1/TNF/IL6/SRC/JUN/PTGS2/MMP9/TLR4/JAK2/FGF2/HDAC1/PDGFRB/TERT	13
BP	GO:0071241	cellular response to inorganic substance	17/103	229/18903	6.56e-15	4.53e-13	1.79e-13	AKT1/EGFR/JUN/MAPK3/PTGS2/MMP9/MAPK1/PARP1/APP/BRAF/CDK2/MAPK8/HSPA5/NFE2L2/CCNA2/SNCA/CYP1A2	17
BP	GO:0071902	positive regulation of protein serine/threonine kinase activity	17/103	229/18903	6.56e-15	4.53e-13	1.79e-13	AKT1/TNF/SRC/EGFR/HSP90AB1/ERBB2/CCND1/TLR4/SIRT1/PTPRC/FGF2/EZH2/PDGFRB/SNCA/PTK2B/ADRB2/CALM1	17
BP	GO:0018108	peptidyl-tyrosine phosphorylation	20/103	380/18903	1.59e-14	1.08e-12	4.28e-13	TNF/IL6/SRC/EGFR/MAPK3/ERBB2/MTOR/JAK2/KDR/IL2/APP/PTPRC/ABL1/PTPN11/ACE/PDGFRB/FYN/NTRK1/NTRK2/PTK2B	20
BP	GO:0018212	peptidyl-tyrosine modification	20/103	382/18903	1.76e-14	1.17e-12	4.64e-13	TNF/IL6/SRC/EGFR/MAPK3/ERBB2/MTOR/JAK2/KDR/IL2/APP/PTPRC/ABL1/PTPN11/ACE/PDGFRB/FYN/NTRK1/NTRK2/PTK2B	20
BP	GO:1904019	epithelial cell apoptotic process	14/103	137/18903	2.23e-14	1.46e-12	5.8e-13	TNF/IL6/BCL2/CASP3/ESR1/BCL2L1/JAK2/KDR/BRAF/ABL1/PPARA/CASP9/NFE2L2/TERT	14
BP	GO:0033002	muscle cell proliferation	17/103	247/18903	2.3e-14	1.48e-12	5.89e-13	AKT1/TNF/IL6/SRC/JUN/PPARG/PTGS2/MMP9/TLR4/JAK2/MAPK14/FGF2/HDAC1/ABL1/PDGFRB/CDK1/TERT	17
BP	GO:0048863	stem cell differentiation	17/103	248/18903	2.46e-14	1.56e-12	6.19e-13	STAT3/BCL2/ESR1/HIF1A/MAPK3/GSK3B/MAPK1/PTPRC/CDC42/MAPK14/FGF2/EZH2/HDAC1/ABL1/ITGB1/ACE/NFE2L2	17
BP	GO:0051054	positive regulation of DNA metabolic process	18/103	301/18903	4.23e-14	2.65e-12	1.05e-12	AKT1/TNF/IL6/SRC/EGFR/HSP90AA1/MAPK3/HSP90AB1/MAPK1/SIRT1/IL2/PARP1/PTPRC/FGF2/CDK2/PDGFRB/CDK1/PTK2B	18
BP	GO:1900182	positive regulation of protein localization to nucleus	12/103	87/18903	4.48e-14	2.76e-12	1.1e-12	AKT1/SRC/HSP90AA1/HSP90AB1/PTGS2/JAK2/PARP1/MAPK14/FYN/CDK1/TERT/F2	12
BP	GO:0052547	regulation of peptidase activity	21/103	459/18903	5.09e-14	3.09e-12	1.23e-12	GAPDH/AKT1/TNF/SRC/STAT3/PPARG/PTGS2/MMP9/SIRT1/JAK2/APP/HDAC1/CASP8/CASP9/CASP1/FYN/CTSB/SNCA/GRIN2B/VCP/XDH	21
BP	GO:0043491	protein kinase B signaling	16/103	218/18903	5.22e-14	3.12e-12	1.24e-12	AKT1/TNF/SRC/EGFR/HSP90AA1/HSP90AB1/MTOR/SIRT1/KDR/FGF2/PPARA/ITGB1/NTRK1/NTRK2/DRD2/XDH	16
BP	GO:0031349	positive regulation of defense response	18/103	307/18903	5.94e-14	3.51e-12	1.39e-12	TNF/IL6/SRC/HSP90AA1/MAPK3/PTGS2/TLR4/EP300/JAK2/IL2/NFKBIA/APP/CREBBP/ACE/CASP1/FYN/AGTR1/SNCA	18
BP	GO:0071222	cellular response to lipopolysaccharide	16/103	222/18903	6.93e-14	4.03e-12	1.6e-12	AKT1/TNF/IL6/SRC/MAPK3/TLR4/MAPK1/JAK2/RELA/NFKBIA/MAPK14/CDK4/ABL1/MAPK8/PRKCA/CASP1	16
BP	GO:0009411	response to UV	14/103	149/18903	7.25e-14	4.16e-12	1.65e-12	AKT1/EGFR/BCL2/CASP3/PTGS2/MMP9/CCND1/SIRT1/EP300/RELA/PARP1/CREBBP/MAPK8/CASP9	14
BP	GO:0009266	response to temperature stimulus	15/103	186/18903	8.52e-14	4.81e-12	1.91e-12	AKT1/HSP90AA1/HSP90AB1/PTGS2/MTOR/GSK3B/SIRT1/EP300/NFKBIA/PRKACA/CASP8/CREBBP/NTRK1/VCP/ADRB2	15
BP	GO:0050890	cognition	18/103	314/18903	8.75e-14	4.88e-12	1.94e-12	TNF/SRC/EGFR/CASP3/HIF1A/PTGS2/MAPK1/EP300/APP/BRAF/ABL1/ITGB1/FYN/HMGCR/NTRK1/GRIN2B/NTRK2/DRD2	18
BP	GO:0032355	response to estradiol	13/103	121/18903	1.03e-13	5.68e-12	2.25e-12	EGFR/STAT3/CASP3/ESR1/PTGS2/CCND1/EZH2/CASP8/CASP9/PDGFRB/CCNA2/ESR2/CYP19A1	13
BP	GO:0038083	peptidyl-tyrosine autophosphorylation	8/103	21/18903	1.13e-13	6.13e-12	2.43e-12	SRC/EGFR/MAPK3/KDR/ABL1/ACE/NTRK1/PTK2B	8
BP	GO:0043524	negative regulation of neuron apoptotic process	14/103	154/18903	1.15e-13	6.16e-12	2.44e-12	BCL2/JUN/HIF1A/HSP90AB1/CCND1/BCL2L1/JAK2/KDR/BRAF/TERT/NTRK1/SNCA/NTRK2/PTK2B	14
BP	GO:0007611	learning or memory	17/103	273/18903	1.19e-13	6.28e-12	2.49e-12	SRC/EGFR/CASP3/HIF1A/PTGS2/MAPK1/EP300/APP/BRAF/ABL1/ITGB1/FYN/HMGCR/NTRK1/GRIN2B/NTRK2/DRD2	17
BP	GO:0009755	hormone-mediated signaling pathway	15/103	192/18903	1.36e-13	7.1e-12	2.82e-12	SRC/ESR1/PPARG/SIRT1/EP300/JAK2/PARP1/HDAC1/AR/PPARA/PTPN11/NR3C1/REN/ESR2/RXRA	15
BP	GO:0052548	regulation of endopeptidase activity	20/103	428/18903	1.48e-13	7.63e-12	3.03e-12	GAPDH/AKT1/TNF/SRC/STAT3/PPARG/PTGS2/MMP9/SIRT1/JAK2/APP/HDAC1/CASP8/CASP9/CASP1/FYN/SNCA/GRIN2B/VCP/XDH	20
BP	GO:0001503	ossification	20/103	429/18903	1.55e-13	7.78e-12	3.09e-12	AKT1/TNF/IL6/EGFR/BCL2/HIF1A/MAPK3/PPARG/PTGS2/MMP9/GSK3B/MAPK1/MAPK14/PRKACA/FGF2/PTPN11/FASN/RXRA/PTK2B/ADRB2	20
BP	GO:0001819	positive regulation of cytokine production	21/103	486/18903	1.55e-13	7.78e-12	3.09e-12	GAPDH/TNF/IL6/SRC/STAT3/HSP90AA1/HIF1A/PTGS2/TLR4/SIRT1/JAK2/IL2/RELA/APP/PTPRC/MAPK14/CASP8/ABL1/PTPN11/CASP1/DRD2	21
BP	GO:0071219	cellular response to molecule of bacterial origin	16/103	234/18903	1.57e-13	7.8e-12	3.09e-12	AKT1/TNF/IL6/SRC/MAPK3/TLR4/MAPK1/JAK2/RELA/NFKBIA/MAPK14/CDK4/ABL1/MAPK8/PRKCA/CASP1	16
BP	GO:2000116	regulation of cysteine-type endopeptidase activity	16/103	235/18903	1.68e-13	8.18e-12	3.24e-12	AKT1/TNF/SRC/PPARG/PTGS2/MMP9/SIRT1/JAK2/CASP8/CASP9/CASP1/FYN/SNCA/GRIN2B/VCP/XDH	16
BP	GO:0042391	regulation of membrane potential	20/103	431/18903	1.69e-13	8.18e-12	3.24e-12	AKT1/TNF/SRC/BCL2/MTOR/GSK3B/BCL2L1/KDR/PARP1/APP/ABL1/SNCA/GRIN2B/NTRK2/DRD2/PTK2B/VCP/ADRB2/OPRM1/CALM1	20
BP	GO:0016049	cell growth	21/103	493/18903	2.04e-13	9.78e-12	3.88e-12	AKT1/EGFR/HSP90AA1/BCL2/HSP90AB1/ERBB2/MTOR/GSK3B/SIRT1/IL2/APP/CDC42/ABL1/PPARA/ITGB1/ESR2/AURKA/AGTR1/PTK2B/G6PD/F2	21
BP	GO:0071248	cellular response to metal ion	15/103	198/18903	2.14e-13	1.01e-11	4.01e-12	AKT1/EGFR/JUN/MAPK3/PTGS2/MMP9/MAPK1/PARP1/APP/BRAF/MAPK8/HSPA5/NFE2L2/SNCA/CYP1A2	15
BP	GO:0045471	response to ethanol	13/103	128/18903	2.16e-13	1.01e-11	4.01e-12	TNF/CCND1/IL2/CASP8/PPARA/FYN/CDK1/GRIN2B/DRD2/MAOB/PTK2B/OPRM1/G6PD	13
BP	GO:0036473	cell death in response to oxidative stress	12/103	100/18903	2.51e-13	1.16e-11	4.59e-12	AKT1/TNF/BCL2/HIF1A/TLR4/SIRT1/JAK2/PARP1/MCL1/ABL1/FYN/NFE2L2	12
BP	GO:0042542	response to hydrogen peroxide	13/103	130/18903	2.65e-13	1.21e-11	4.8e-12	IL6/SRC/BCL2/CASP3/SIRT1/RELA/EZH2/ABL1/PDGFRB/FYN/NFE2L2/CDK1/PTK2B	13
BP	GO:0042060	wound healing	20/103	442/18903	2.7e-13	1.22e-11	4.83e-12	TNF/IL6/SRC/CASP3/HIF1A/PPARG/ERBB2/MTOR/TLR4/JAK2/KDR/MAPK14/FGF2/PPARA/ITGB1/PRKCA/PDGFRB/NFE2L2/OPRM1/F2	20
BP	GO:2001243	negative regulation of intrinsic apoptotic signaling pathway	12/103	101/18903	2.83e-13	1.27e-11	5.02e-12	AKT1/SRC/BCL2/HIF1A/PTGS2/MMP9/SIRT1/MDM2/BCL2L1/HDAC1/MCL1/NFE2L2	12
BP	GO:0050804	modulation of chemical synaptic transmission	20/103	448/18903	3.46e-13	1.53e-11	6.07e-12	TNF/SRC/PTGS2/GSK3B/MAPK1/JAK2/APP/PRKACA/BRAF/ABL1/ITGB1/ACE/FYN/NTRK1/SNCA/GRIN2B/NTRK2/DRD2/PTK2B/ADRB2	20
BP	GO:0099177	regulation of trans-synaptic signaling	20/103	449/18903	3.61e-13	1.58e-11	6.26e-12	TNF/SRC/PTGS2/GSK3B/MAPK1/JAK2/APP/PRKACA/BRAF/ABL1/ITGB1/ACE/FYN/NTRK1/SNCA/GRIN2B/NTRK2/DRD2/PTK2B/ADRB2	20
BP	GO:0010506	regulation of autophagy	18/103	344/18903	4.15e-13	1.8e-11	7.13e-12	GAPDH/AKT1/STAT3/BCL2/CASP3/HIF1A/MAPK3/MTOR/GSK3B/SIRT1/EP300/KDR/PRKACA/MCL1/ABL1/MAPK8/SNCA/ADRB2	18
BP	GO:1900180	regulation of protein localization to nucleus	13/103	135/18903	4.33e-13	1.85e-11	7.35e-12	AKT1/SRC/HSP90AA1/HSP90AB1/PTGS2/GSK3B/JAK2/PARP1/MAPK14/FYN/CDK1/TERT/F2	13
BP	GO:0007623	circadian rhythm	15/103	210/18903	5.06e-13	2.15e-11	8.51e-12	TNF/PPARG/MTOR/GSK3B/SIRT1/EP300/PARP1/EZH2/HDAC1/PPARA/MAPK8/CDK1/NTRK1/NTRK2/DRD2	15
BP	GO:0030879	mammary gland development	13/103	138/18903	5.76e-13	2.42e-11	9.58e-12	AKT1/SRC/ESR1/HIF1A/CCND1/MAPK1/JAK2/FGF2/AR/NR3C1/FASN/CYP19A1/XDH	13
BP	GO:0033138	positive regulation of peptidyl-serine phosphorylation	12/103	108/18903	6.42e-13	2.66e-11	1.06e-11	AKT1/TNF/IL6/EGFR/HSP90AA1/BCL2/HSP90AB1/PTGS2/APP/BRAF/SNCA/NTRK2	12
BP	GO:0048660	regulation of smooth muscle cell proliferation	14/103	175/18903	6.76e-13	2.78e-11	1.1e-11	AKT1/TNF/IL6/SRC/JUN/PPARG/PTGS2/MMP9/TLR4/JAK2/FGF2/HDAC1/PDGFRB/TERT	14
BP	GO:0010634	positive regulation of epithelial cell migration	14/103	176/18903	7.31e-13	2.98e-11	1.18e-11	AKT1/SRC/JUN/HIF1A/PTGS2/MMP9/MTOR/SIRT1/KDR/FGF2/ABL1/PRKCA/NFE2L2/PTK2B	14
BP	GO:0043666	regulation of phosphoprotein phosphatase activity	10/103	59/18903	7.43e-13	2.99e-11	1.19e-11	TNF/HSP90AB1/MTOR/GSK3B/JAK2/PTPRC/PDGFRB/LGALS3/DRD2/CALM1	10
BP	GO:0002573	myeloid leukocyte differentiation	15/103	218/18903	8.73e-13	3.48e-11	1.38e-11	TNF/SRC/JUN/PPARG/MMP9/MTOR/TLR4/SIRT1/PARP1/APP/CDC42/MAPK14/CASP8/PRKCA/FASN	15
BP	GO:0046686	response to cadmium ion	10/103	60/18903	8.87e-13	3.48e-11	1.38e-11	AKT1/EGFR/JUN/MAPK3/MMP9/MAPK1/MAPK8/CDK1/TERT/CYP1A2	10
BP	GO:0050678	regulation of epithelial cell proliferation	19/103	414/18903	8.89e-13	3.48e-11	1.38e-11	AKT1/TNF/EGFR/STAT3/JUN/HIF1A/PPARG/ERBB2/CCND1/SIRT1/KDR/CDC42/FGF2/CDK4/AR/PRKCA/AGTR1/DRD2/XDH	19
BP	GO:0048659	smooth muscle cell proliferation	14/103	179/18903	9.23e-13	3.58e-11	1.42e-11	AKT1/TNF/IL6/SRC/JUN/PPARG/PTGS2/MMP9/TLR4/JAK2/FGF2/HDAC1/PDGFRB/TERT	14
BP	GO:0045787	positive regulation of cell cycle	18/103	362/18903	9.84e-13	3.78e-11	1.5e-11	AKT1/TNF/SRC/EGFR/CCND1/MDM2/APP/CDC42/EZH2/CDK4/ABL1/PTPN11/PRKCA/PDGFRB/CDK1/TERT/AURKA/DRD2	18
BP	GO:1902893	regulation of miRNA transcription	10/103	61/18903	1.06e-12	4.02e-11	1.59e-11	TNF/STAT3/JUN/HIF1A/PPARG/RELA/FGF2/PPARA/NR3C1/TERT	10
BP	GO:0014065	phosphatidylinositol 3-kinase signaling	13/103	145/18903	1.09e-12	4.12e-11	1.63e-11	AKT1/TNF/SRC/EGFR/ERBB2/SIRT1/JAK2/KDR/FGF2/PDGFRB/NTRK1/NTRK2/F2	13
BP	GO:0010631	epithelial cell migration	18/103	366/18903	1.18e-12	4.42e-11	1.75e-11	AKT1/TNF/SRC/JUN/HIF1A/PPARG/PTGS2/MMP9/MTOR/SIRT1/KDR/FGF2/ABL1/ITGB1/PTPN11/PRKCA/NFE2L2/PTK2B	18
BP	GO:0043434	response to peptide hormone	19/103	421/18903	1.19e-12	4.42e-11	1.75e-11	AKT1/SRC/STAT3/PPARG/PTGS2/MTOR/GSK3B/SIRT1/JAK2/RELA/PARP1/GRB2/MAPK14/CDK4/PPARA/PTPN11/NFE2L2/CCNA2/AGTR1	19
BP	GO:0061614	miRNA transcription	10/103	62/18903	1.25e-12	4.6e-11	1.82e-11	TNF/STAT3/JUN/HIF1A/PPARG/RELA/FGF2/PPARA/NR3C1/TERT	10
BP	GO:0050679	positive regulation of epithelial cell proliferation	15/103	224/18903	1.3e-12	4.66e-11	1.85e-11	AKT1/TNF/EGFR/STAT3/JUN/HIF1A/ERBB2/CCND1/SIRT1/KDR/CDC42/FGF2/AR/PRKCA/AGTR1	15
BP	GO:0097191	extrinsic apoptotic signaling pathway	15/103	224/18903	1.3e-12	4.66e-11	1.85e-11	AKT1/TNF/SRC/BCL2/GSK3B/BCL2L1/JAK2/IL2/RELA/PTPRC/MCL1/CASP8/AR/TERT/LGALS3	15
BP	GO:0090132	epithelium migration	18/103	369/18903	1.36e-12	4.85e-11	1.92e-11	AKT1/TNF/SRC/JUN/HIF1A/PPARG/PTGS2/MMP9/MTOR/SIRT1/KDR/FGF2/ABL1/ITGB1/PTPN11/PRKCA/NFE2L2/PTK2B	18
BP	GO:0090130	tissue migration	18/103	374/18903	1.7e-12	6.03e-11	2.39e-11	AKT1/TNF/SRC/JUN/HIF1A/PPARG/PTGS2/MMP9/MTOR/SIRT1/KDR/FGF2/ABL1/ITGB1/PTPN11/PRKCA/NFE2L2/PTK2B	18
BP	GO:0001667	ameboidal-type cell migration	20/103	492/18903	1.94e-12	6.76e-11	2.68e-11	AKT1/TNF/SRC/JUN/HIF1A/PPARG/PTGS2/MMP9/MTOR/SIRT1/KDR/CDC42/FGF2/BRAF/ABL1/ITGB1/PTPN11/PRKCA/NFE2L2/PTK2B	20
BP	GO:0051896	regulation of protein kinase B signaling	14/103	189/18903	1.94e-12	6.76e-11	2.68e-11	TNF/SRC/EGFR/HSP90AA1/HSP90AB1/MTOR/SIRT1/FGF2/PPARA/ITGB1/NTRK1/NTRK2/DRD2/XDH	14
BP	GO:0008406	gonad development	15/103	233/18903	2.29e-12	7.9e-11	3.13e-11	SRC/BCL2/CASP3/ESR1/CCND1/SIRT1/BCL2L1/KDR/AR/HSPA5/ACE/PDGFRB/REN/NTRK1/CYP19A1	15
BP	GO:0071496	cellular response to external stimulus	17/103	328/18903	2.31e-12	7.9e-11	3.13e-11	BCL2/MAPK3/PTGS2/MTOR/TLR4/MAPK1/SIRT1/PTPRC/FGF2/CASP8/PPARA/MAPK8/HSPA5/CASP1/NFE2L2/RXRA/COMT	17
BP	GO:0034605	cellular response to heat	10/103	66/18903	2.42e-12	8.15e-11	3.23e-11	HSP90AA1/HSP90AB1/PTGS2/MTOR/GSK3B/SIRT1/EP300/PRKACA/CREBBP/VCP	10
BP	GO:0044089	positive regulation of cellular component biogenesis	20/103	498/18903	2.42e-12	8.15e-11	3.23e-11	TNF/SRC/HSP90AA1/ESR1/MTOR/TLR4/GSK3B/KDR/GRB2/CDC42/BRAF/ABL1/CDK2/PRKCA/NTRK1/SNCA/LGALS3/NTRK2/PTK2B/VCP	20
BP	GO:0045936	negative regulation of phosphate metabolic process	19/103	440/18903	2.59e-12	8.65e-11	3.43e-11	AKT1/TNF/STAT3/JUN/CASP3/PPARG/GSK3B/SIRT1/IL2/PARP1/PTPRC/ABL1/PPARA/HMGCR/SNCA/LGALS3/DRD2/XDH/CALM1	19
BP	GO:0010563	negative regulation of phosphorus metabolic process	19/103	441/18903	2.7e-12	8.93e-11	3.54e-11	AKT1/TNF/STAT3/JUN/CASP3/PPARG/GSK3B/SIRT1/IL2/PARP1/PTPRC/ABL1/PPARA/HMGCR/SNCA/LGALS3/DRD2/XDH/CALM1	19
BP	GO:0010952	positive regulation of peptidase activity	14/103	194/18903	2.78e-12	9.11e-11	3.61e-11	TNF/STAT3/PPARG/SIRT1/JAK2/APP/CASP8/CASP9/CASP1/FYN/SNCA/GRIN2B/VCP/XDH	14
BP	GO:0034764	positive regulation of transmembrane transport	15/103	237/18903	2.93e-12	9.53e-11	3.78e-11	AKT1/MAPK14/BRAF/ABL1/ITGB1/PTPN11/NFE2L2/TERT/ABCB1/SNCA/CTSS/ADRB2/G6PD/CALM1/F2	15
BP	GO:0045137	development of primary sexual characteristics	15/103	238/18903	3.11e-12	1e-10	3.99e-11	SRC/BCL2/CASP3/ESR1/CCND1/SIRT1/BCL2L1/KDR/AR/HSPA5/ACE/PDGFRB/REN/NTRK1/CYP19A1	15
BP	GO:1902895	positive regulation of miRNA transcription	9/103	47/18903	3.4e-12	1.09e-10	4.32e-11	TNF/STAT3/JUN/HIF1A/PPARG/RELA/FGF2/NR3C1/TERT	9
BP	GO:0007548	sex differentiation	16/103	288/18903	3.8e-12	1.21e-10	4.79e-11	SRC/BCL2/CASP3/ESR1/CCND1/SIRT1/BCL2L1/KDR/AR/PTPN11/HSPA5/ACE/PDGFRB/REN/NTRK1/CYP19A1	16
BP	GO:0061180	mammary gland epithelium development	10/103	69/18903	3.84e-12	1.21e-10	4.81e-11	AKT1/SRC/ESR1/HIF1A/CCND1/MAPK1/JAK2/FGF2/AR/NR3C1	10
BP	GO:0062012	regulation of small molecule metabolic process	17/103	339/18903	3.91e-12	1.22e-10	4.86e-11	AKT1/TNF/SRC/STAT3/HIF1A/PPARG/PTGS2/MTOR/SIRT1/EP300/PARP1/APP/PPARA/NR3C1/SNCA/PTK2B/VCP	17
BP	GO:0051090	regulation of DNA-binding transcription factor activity	19/103	454/18903	4.48e-12	1.39e-10	5.5e-11	AKT1/TNF/IL6/STAT3/ESR1/MAPK3/PPARG/TLR4/SIRT1/EP300/JAK2/RELA/NFKBIA/APP/EZH2/AR/MAPK8/ESR2/NTRK1	19
BP	GO:0051235	maintenance of location	17/103	342/18903	4.5e-12	1.39e-10	5.5e-11	AKT1/TNF/IL6/PPARG/SIRT1/NFKBIA/PTPRC/PRKACA/FGF2/ABL1/PPARA/HSPA5/SNCA/DRD2/PTK2B/CALM1/F2	17
BP	GO:0010632	regulation of epithelial cell migration	16/103	292/18903	4.69e-12	1.43e-10	5.68e-11	AKT1/TNF/SRC/JUN/HIF1A/PPARG/PTGS2/MMP9/MTOR/SIRT1/KDR/FGF2/ABL1/PRKCA/NFE2L2/PTK2B	16
BP	GO:2000379	positive regulation of reactive oxygen species metabolic process	10/103	71/18903	5.17e-12	1.57e-10	6.21e-11	TLR4/GRB2/MAPK14/PDGFRB/NFE2L2/AGTR1/SNCA/PTK2B/XDH/F2	10
BP	GO:0051222	positive regulation of protein transport	16/103	294/18903	5.2e-12	1.57e-10	6.21e-11	TNF/SRC/HSP90AA1/HIF1A/PPARG/HSP90AB1/PTGS2/ERBB2/TLR4/GSK3B/JAK2/MAPK14/PRKACA/MAPK8/FYN/CDK1	16
BP	GO:0031960	response to corticosteroid	13/103	165/18903	5.75e-12	1.72e-10	6.82e-11	TNF/IL6/SRC/BCL2/CASP3/PTGS2/CCND1/JAK2/PARP1/CASP9/ACE/NR3C1/MAOB	13
BP	GO:0043281	regulation of cysteine-type endopeptidase activity involved in apoptotic process	14/103	205/18903	5.88e-12	1.75e-10	6.92e-11	AKT1/TNF/SRC/PPARG/PTGS2/MMP9/SIRT1/JAK2/CASP8/CASP9/CASP1/SNCA/VCP/XDH	14
BP	GO:2001237	negative regulation of extrinsic apoptotic signaling pathway	11/103	99/18903	6.16e-12	1.82e-10	7.21e-11	AKT1/TNF/SRC/BCL2/GSK3B/BCL2L1/RELA/MCL1/AR/TERT/LGALS3	11
BP	GO:0150076	neuroinflammatory response	10/103	73/18903	6.9e-12	2.02e-10	8.01e-11	TNF/IL6/JUN/PTGS2/MMP9/JAK2/APP/PTPRC/ITGB1/SNCA	10
BP	GO:0071383	cellular response to steroid hormone stimulus	14/103	209/18903	7.63e-12	2.22e-10	8.8e-11	SRC/ESR1/SIRT1/EP300/JAK2/PARP1/HDAC1/AR/PPARA/CASP9/ACE/NR3C1/ESR2/RXRA	14
BP	GO:0043254	regulation of protein-containing complex assembly	18/103	410/18903	7.91e-12	2.26e-10	8.96e-11	TNF/SRC/HSP90AA1/ESR1/MTOR/TLR4/GSK3B/EP300/PARP1/GRB2/CDC42/ABL1/PTPN11/HSPA5/SNCA/LGALS3/PTK2B/VCP	18
BP	GO:0034612	response to tumor necrosis factor	15/103	254/18903	7.92e-12	2.26e-10	8.96e-11	AKT1/TNF/CASP3/MAPK3/PTGS2/MAPK1/SIRT1/JAK2/RELA/NFKBIA/MAPK14/CASP8/CASP1/NFE2L2/PTK2B	15
BP	GO:2000628	regulation of miRNA metabolic process	10/103	74/18903	7.94e-12	2.26e-10	8.96e-11	TNF/STAT3/JUN/HIF1A/PPARG/RELA/FGF2/PPARA/NR3C1/TERT	10
BP	GO:0050806	positive regulation of synaptic transmission	13/103	170/18903	8.41e-12	2.38e-10	9.43e-11	TNF/PTGS2/GSK3B/MAPK1/APP/BRAF/ABL1/NTRK1/SNCA/GRIN2B/NTRK2/DRD2/PTK2B	13
BP	GO:0043467	regulation of generation of precursor metabolites and energy	12/103	134/18903	8.63e-12	2.42e-10	9.61e-11	AKT1/TNF/STAT3/HIF1A/MTOR/GSK3B/EP300/APP/PPARA/CDK1/SNCA/VCP	12
BP	GO:0034504	protein localization to nucleus	16/103	306/18903	9.5e-12	2.63e-10	1.04e-10	AKT1/SRC/STAT3/HSP90AA1/HSP90AB1/PTGS2/GSK3B/MDM2/JAK2/PARP1/NFKBIA/MAPK14/FYN/CDK1/TERT/F2	16
BP	GO:0048608	reproductive structure development	16/103	306/18903	9.5e-12	2.63e-10	1.04e-10	SRC/BCL2/CASP3/ESR1/CCND1/SIRT1/BCL2L1/KDR/AR/PTPN11/HSPA5/ACE/PDGFRB/REN/NTRK1/CYP19A1	16
BP	GO:2001242	regulation of intrinsic apoptotic signaling pathway	13/103	172/18903	9.76e-12	2.68e-10	1.06e-10	AKT1/SRC/BCL2/HIF1A/PTGS2/MMP9/SIRT1/MDM2/BCL2L1/PARP1/HDAC1/MCL1/NFE2L2	13
BP	GO:0010720	positive regulation of cell development	16/103	307/18903	9.98e-12	2.71e-10	1.07e-10	TNF/IL6/BCL2/HIF1A/MTOR/CDC42/FGF2/HDAC1/BRAF/ABL1/ITGB1/ACE/AURKA/NTRK2/DRD2/OPRM1	16
BP	GO:0044403	biological process involved in symbiotic interaction	16/103	307/18903	9.98e-12	2.71e-10	1.07e-10	GAPDH/SRC/EGFR/JUN/HSP90AB1/EP300/BCL2L1/JAK2/CDC42/HDAC1/ITGB1/CDK1/FASN/CTSB/AGTR1/F2	16
BP	GO:0043401	steroid hormone mediated signaling pathway	12/103	136/18903	1.03e-11	2.78e-10	1.1e-10	SRC/ESR1/SIRT1/EP300/JAK2/PARP1/HDAC1/AR/PPARA/NR3C1/ESR2/RXRA	12
BP	GO:0010950	positive regulation of endopeptidase activity	13/103	174/18903	1.13e-11	3.03e-10	1.2e-10	TNF/STAT3/PPARG/SIRT1/JAK2/CASP8/CASP9/CASP1/FYN/SNCA/GRIN2B/VCP/XDH	13
BP	GO:0061458	reproductive system development	16/103	310/18903	1.16e-11	3.05e-10	1.21e-10	SRC/BCL2/CASP3/ESR1/CCND1/SIRT1/BCL2L1/KDR/AR/PTPN11/HSPA5/ACE/PDGFRB/REN/NTRK1/CYP19A1	16
BP	GO:1904951	positive regulation of establishment of protein localization	16/103	310/18903	1.16e-11	3.05e-10	1.21e-10	TNF/SRC/HSP90AA1/HIF1A/PPARG/HSP90AB1/PTGS2/ERBB2/TLR4/GSK3B/JAK2/MAPK14/PRKACA/MAPK8/FYN/CDK1	16
BP	GO:0010469	regulation of signaling receptor activity	13/103	175/18903	1.22e-11	3.19e-10	1.27e-10	TNF/SRC/HIF1A/PPARG/JAK2/APP/HDAC1/PPARA/ITGB1/ESR2/PTK2B/ADRB2/OPRM1	13
BP	GO:0043534	blood vessel endothelial cell migration	13/103	177/18903	1.4e-11	3.66e-10	1.45e-10	AKT1/TNF/HIF1A/PPARG/PTGS2/SIRT1/KDR/FGF2/ABL1/ITGB1/PRKCA/NFE2L2/PTK2B	13
BP	GO:0048015	phosphatidylinositol-mediated signaling	13/103	178/18903	1.51e-11	3.91e-10	1.55e-10	AKT1/TNF/SRC/EGFR/ERBB2/SIRT1/JAK2/KDR/FGF2/PDGFRB/NTRK1/NTRK2/F2	13
BP	GO:0031331	positive regulation of cellular catabolic process	18/103	429/18903	1.68e-11	4.31e-10	1.71e-10	AKT1/TNF/IL6/HIF1A/MAPK3/MTOR/GSK3B/SIRT1/MDM2/KDR/APP/PPARA/NFE2L2/AURKA/SNCA/PTK2B/VCP/ADRB2	18
BP	GO:0035265	organ growth	13/103	180/18903	1.74e-11	4.45e-10	1.76e-10	AKT1/BCL2/ESR1/MAPK14/FGF2/ABL1/AR/PPARA/PTPN11/PDGFRB/CDK1/CYP19A1/G6PD	13
BP	GO:0014068	positive regulation of phosphatidylinositol 3-kinase signaling	10/103	80/18903	1.77e-11	4.48e-10	1.78e-10	TNF/SRC/SIRT1/JAK2/KDR/FGF2/PDGFRB/NTRK1/NTRK2/F2	10
BP	GO:1903201	regulation of oxidative stress-induced cell death	10/103	80/18903	1.77e-11	4.48e-10	1.78e-10	AKT1/TNF/HIF1A/TLR4/SIRT1/PARP1/MCL1/ABL1/FYN/NFE2L2	10
BP	GO:2000630	positive regulation of miRNA metabolic process	9/103	56/18903	1.82e-11	4.56e-10	1.81e-10	TNF/STAT3/JUN/HIF1A/PPARG/RELA/FGF2/NR3C1/TERT	9
BP	GO:0033135	regulation of peptidyl-serine phosphorylation	12/103	143/18903	1.87e-11	4.64e-10	1.84e-10	AKT1/TNF/IL6/EGFR/HSP90AA1/BCL2/HSP90AB1/PTGS2/APP/BRAF/SNCA/NTRK2	12
BP	GO:2001056	positive regulation of cysteine-type endopeptidase activity	12/103	143/18903	1.87e-11	4.64e-10	1.84e-10	TNF/PPARG/SIRT1/JAK2/CASP8/CASP9/CASP1/FYN/SNCA/GRIN2B/VCP/XDH	12
BP	GO:1904035	regulation of epithelial cell apoptotic process	11/103	110/18903	1.98e-11	4.84e-10	1.92e-10	TNF/IL6/BCL2/ESR1/JAK2/KDR/BRAF/ABL1/PPARA/NFE2L2/TERT	11
BP	GO:0071560	cellular response to transforming growth factor beta stimulus	15/103	271/18903	1.99e-11	4.84e-10	1.92e-10	SRC/STAT3/JUN/PPARG/HSP90AB1/SIRT1/EP300/PARP1/HDAC1/CREBBP/ABL1/PPARA/HSPA5/NR3C1/FYN	15
BP	GO:0071276	cellular response to cadmium ion	8/103	37/18903	2e-11	4.84e-10	1.92e-10	AKT1/EGFR/JUN/MAPK3/MMP9/MAPK1/MAPK8/CYP1A2	8
BP	GO:0048017	inositol lipid-mediated signaling	13/103	182/18903	2e-11	4.84e-10	1.92e-10	AKT1/TNF/SRC/EGFR/ERBB2/SIRT1/JAK2/KDR/FGF2/PDGFRB/NTRK1/NTRK2/F2	13
BP	GO:0014066	regulation of phosphatidylinositol 3-kinase signaling	11/103	111/18903	2.19e-11	5.25e-10	2.08e-10	TNF/SRC/EGFR/SIRT1/JAK2/KDR/FGF2/PDGFRB/NTRK1/NTRK2/F2	11
BP	GO:0018107	peptidyl-threonine phosphorylation	11/103	111/18903	2.19e-11	5.25e-10	2.08e-10	AKT1/BCL2/MTOR/GSK3B/MAPK1/APP/PRKACA/MAPK8/PRKCA/CDK1/CALM1	11
BP	GO:0048708	astrocyte differentiation	10/103	82/18903	2.28e-11	5.43e-10	2.15e-10	TNF/IL6/STAT3/MAPK3/TLR4/MAPK1/APP/ABL1/PTPN11/F2	10
BP	GO:0006816	calcium ion transport	18/103	440/18903	2.54e-11	6.01e-10	2.39e-10	BCL2/PTGS2/PTPRC/PRKACA/FGF2/ABL1/ACE/PDGFRB/FYN/SNCA/LGALS3/GRIN2B/DRD2/PTK2B/OPRM1/G6PD/CALM1/F2	18
BP	GO:0006109	regulation of carbohydrate metabolic process	13/103	186/18903	2.63e-11	6.18e-10	2.45e-10	AKT1/SRC/STAT3/HIF1A/MTOR/GSK3B/SIRT1/EP300/APP/PPARA/NR3C1/SNCA/PTK2B	13
BP	GO:0071559	response to transforming growth factor beta	15/103	277/18903	2.72e-11	6.37e-10	2.52e-10	SRC/STAT3/JUN/PPARG/HSP90AB1/SIRT1/EP300/PARP1/HDAC1/CREBBP/ABL1/PPARA/HSPA5/NR3C1/FYN	15
BP	GO:0010921	regulation of phosphatase activity	10/103	84/18903	2.92e-11	6.79e-10	2.69e-10	TNF/HSP90AB1/MTOR/GSK3B/JAK2/PTPRC/PDGFRB/LGALS3/DRD2/CALM1	10
BP	GO:0009408	response to heat	11/103	114/18903	2.94e-11	6.8e-10	2.7e-10	AKT1/HSP90AA1/HSP90AB1/PTGS2/MTOR/GSK3B/SIRT1/EP300/PRKACA/CREBBP/VCP	11
BP	GO:0001890	placenta development	12/103	150/18903	3.29e-11	7.56e-10	3e-10	AKT1/EGFR/HIF1A/PPARG/HSP90AB1/PTGS2/MAPK1/PARP1/GRB2/MAPK14/CASP8/CTSB	12
BP	GO:0007178	transmembrane receptor protein serine/threonine kinase signaling pathway	17/103	390/18903	3.58e-11	8.19e-10	3.25e-10	SRC/STAT3/JUN/MAPK3/PPARG/HSP90AB1/SIRT1/EP300/JAK2/KDR/PARP1/MAPK14/HDAC1/CREBBP/ABL1/PPARA/HSPA5	17
BP	GO:0062013	positive regulation of small molecule metabolic process	12/103	152/18903	3.84e-11	8.74e-10	3.47e-10	AKT1/TNF/SRC/HIF1A/PPARG/PTGS2/MTOR/SIRT1/APP/PPARA/SNCA/VCP	12
BP	GO:0050731	positive regulation of peptidyl-tyrosine phosphorylation	13/103	193/18903	4.19e-11	9.45e-10	3.75e-10	TNF/IL6/SRC/EGFR/MTOR/JAK2/IL2/PTPRC/ABL1/PTPN11/ACE/FYN/PTK2B	13
BP	GO:1904062	regulation of cation transmembrane transport	17/103	394/18903	4.2e-11	9.45e-10	3.75e-10	BCL2/MMP9/APP/PRKACA/ABL1/ITGB1/FYN/SNCA/GRIN2B/CTSS/DRD2/PTK2B/ADRB2/OPRM1/G6PD/CALM1/F2	17
BP	GO:0045834	positive regulation of lipid metabolic process	12/103	154/18903	4.48e-11	9.97e-10	3.95e-10	AKT1/TNF/SRC/PPARG/PTGS2/MTOR/CDC42/FGF2/PPARA/PDGFRB/PTK2B/F2	12
BP	GO:0050729	positive regulation of inflammatory response	12/103	154/18903	4.48e-11	9.97e-10	3.95e-10	TNF/IL6/PTGS2/TLR4/JAK2/IL2/NFKBIA/APP/ACE/CASP1/AGTR1/SNCA	12
BP	GO:2001236	regulation of extrinsic apoptotic signaling pathway	12/103	155/18903	4.84e-11	1.07e-09	4.24e-10	AKT1/TNF/SRC/BCL2/GSK3B/BCL2L1/RELA/PTPRC/MCL1/AR/TERT/LGALS3	12
BP	GO:0018210	peptidyl-threonine modification	11/103	120/18903	5.17e-11	1.14e-09	4.51e-10	AKT1/BCL2/MTOR/GSK3B/MAPK1/APP/PRKACA/MAPK8/PRKCA/CDK1/CALM1	11
BP	GO:0010586	miRNA metabolic process	10/103	90/18903	5.89e-11	1.29e-09	5.11e-10	TNF/STAT3/JUN/HIF1A/PPARG/RELA/FGF2/PPARA/NR3C1/TERT	10
BP	GO:0045429	positive regulation of nitric oxide biosynthetic process	8/103	42/18903	5.97e-11	1.3e-09	5.15e-10	AKT1/TNF/HSP90AA1/HSP90AB1/PTGS2/TLR4/JAK2/PTK2B	8
BP	GO:0019216	regulation of lipid metabolic process	16/103	347/18903	6.23e-11	1.35e-09	5.34e-10	AKT1/TNF/SRC/PPARG/PTGS2/MTOR/SIRT1/CDC42/FGF2/CDK4/PPARA/NR3C1/PDGFRB/SNCA/PTK2B/F2	16
BP	GO:0036294	cellular response to decreased oxygen levels	12/103	159/18903	6.53e-11	1.4e-09	5.57e-10	AKT1/SRC/BCL2/HIF1A/PPARG/PTGS2/MTOR/SIRT1/MDM2/NFE2L2/CCNA2/TERT	12
BP	GO:0038127	ERBB signaling pathway	11/103	126/18903	8.8e-11	1.89e-09	7.48e-10	AKT1/SRC/EGFR/MMP9/ERBB2/MAPK1/GRB2/BRAF/ABL1/PTPN11/PTK2B	11
BP	GO:1904407	positive regulation of nitric oxide metabolic process	8/103	44/18903	8.88e-11	1.89e-09	7.49e-10	AKT1/TNF/HSP90AA1/HSP90AB1/PTGS2/TLR4/JAK2/PTK2B	8
BP	GO:1901654	response to ketone	13/103	205/18903	8.91e-11	1.89e-09	7.49e-10	AKT1/SRC/CCND1/SIRT1/BCL2L1/JAK2/PARP1/CDK4/AR/CASP9/ACE/NR3C1/MAOB	13
BP	GO:0035304	regulation of protein dephosphorylation	10/103	94/18903	9.14e-11	1.93e-09	7.64e-10	TNF/HSP90AB1/MTOR/GSK3B/JAK2/PTPRC/PDGFRB/LGALS3/DRD2/CALM1	10
BP	GO:1900407	regulation of cellular response to oxidative stress	10/103	95/18903	1.02e-10	2.13e-09	8.46e-10	AKT1/TNF/HIF1A/TLR4/SIRT1/PARP1/MCL1/ABL1/FYN/NFE2L2	10
BP	GO:0008631	intrinsic apoptotic signaling pathway in response to oxidative stress	8/103	45/18903	1.08e-10	2.24e-09	8.9e-10	AKT1/BCL2/HIF1A/SIRT1/JAK2/PARP1/MCL1/NFE2L2	8
BP	GO:0071375	cellular response to peptide hormone stimulus	15/103	306/18903	1.11e-10	2.3e-09	9.11e-10	AKT1/SRC/STAT3/PPARG/GSK3B/SIRT1/JAK2/RELA/PARP1/GRB2/CDK4/PTPN11/NFE2L2/CCNA2/AGTR1	15
BP	GO:0042176	regulation of protein catabolic process	16/103	361/18903	1.12e-10	2.31e-09	9.16e-10	AKT1/TNF/EGFR/HSP90AA1/HSP90AB1/GSK3B/MDM2/RELA/PRKACA/CDK2/FYN/NFE2L2/HMGCR/AURKA/SNCA/VCP	16
BP	GO:0045931	positive regulation of mitotic cell cycle	11/103	129/18903	1.14e-10	2.34e-09	9.27e-10	AKT1/EGFR/CCND1/MDM2/APP/CDK4/ABL1/PTPN11/PRKCA/CDK1/TERT	11
BP	GO:0045785	positive regulation of cell adhesion	18/103	484/18903	1.21e-10	2.47e-09	9.78e-10	AKT1/TNF/IL6/SRC/ERBB2/GSK3B/JAK2/KDR/IL2/RELA/PTPRC/CDC42/BRAF/ABL1/PTPN11/PRKCA/FYN/PTK2B	18
BP	GO:0010959	regulation of metal ion transport	17/103	423/18903	1.27e-10	2.58e-09	1.02e-09	AKT1/BCL2/PTGS2/PRKACA/ABL1/ITGB1/ACE/PDGFRB/FYN/SNCA/LGALS3/DRD2/PTK2B/ADRB2/G6PD/CALM1/F2	17
BP	GO:0090068	positive regulation of cell cycle process	14/103	260/18903	1.41e-10	2.86e-09	1.14e-09	AKT1/TNF/EGFR/CCND1/MDM2/APP/CDC42/EZH2/CDK4/PDGFRB/CDK1/TERT/AURKA/DRD2	14
BP	GO:0046677	response to antibiotic	8/103	47/18903	1.56e-10	3.13e-09	1.24e-09	HSP90AA1/CASP3/MDM2/JAK2/EZH2/CASP8/HSPA5/CASP9	8
BP	GO:0035303	regulation of dephosphorylation	11/103	133/18903	1.58e-10	3.18e-09	1.26e-09	TNF/SRC/HSP90AB1/MTOR/GSK3B/JAK2/PTPRC/PDGFRB/LGALS3/DRD2/CALM1	11
BP	GO:0019221	cytokine-mediated signaling pathway	18/103	496/18903	1.79e-10	3.58e-09	1.42e-09	AKT1/TNF/IL6/SRC/STAT3/HIF1A/MAPK3/PPARG/SIRT1/JAK2/RELA/NFKBIA/PTPRC/PRKACA/CASP8/PTPN11/CASP1/PTK2B	18
BP	GO:0050730	regulation of peptidyl-tyrosine phosphorylation	14/103	266/18903	1.91e-10	3.78e-09	1.5e-09	TNF/IL6/SRC/EGFR/MTOR/JAK2/IL2/APP/PTPRC/ABL1/PTPN11/ACE/FYN/PTK2B	14
BP	GO:0051091	positive regulation of DNA-binding transcription factor activity	14/103	266/18903	1.91e-10	3.78e-09	1.5e-09	AKT1/TNF/IL6/STAT3/ESR1/PPARG/TLR4/EP300/JAK2/RELA/APP/AR/ESR2/NTRK1	14
BP	GO:0071453	cellular response to oxygen levels	12/103	175/18903	2e-10	3.93e-09	1.56e-09	AKT1/SRC/BCL2/HIF1A/PPARG/PTGS2/MTOR/SIRT1/MDM2/NFE2L2/CCNA2/TERT	12
BP	GO:0051924	regulation of calcium ion transport	14/103	268/18903	2.11e-10	4.13e-09	1.64e-09	BCL2/PTGS2/PRKACA/ABL1/ACE/PDGFRB/FYN/SNCA/LGALS3/DRD2/PTK2B/G6PD/CALM1/F2	14
BP	GO:0035094	response to nicotine	8/103	49/18903	2.21e-10	4.3e-09	1.71e-09	TNF/BCL2/CASP3/MAPK1/RELA/PPARA/NTRK1/DRD2	8
BP	GO:0051099	positive regulation of binding	12/103	177/18903	2.28e-10	4.42e-09	1.75e-09	PPARG/HSP90AB1/MMP9/GSK3B/EP300/JAK2/PARP1/APP/ABL1/ACE/TERT/CALM1	12
BP	GO:2000573	positive regulation of DNA biosynthetic process	9/103	74/18903	2.44e-10	4.71e-09	1.87e-09	TNF/SRC/HSP90AA1/MAPK3/HSP90AB1/MAPK1/FGF2/PDGFRB/PTK2B	9
BP	GO:0060291	long-term synaptic potentiation	10/103	104/18903	2.52e-10	4.82e-09	1.91e-09	GSK3B/MAPK1/APP/BRAF/ABL1/SNCA/GRIN2B/NTRK2/DRD2/PTK2B	10
BP	GO:1902882	regulation of response to oxidative stress	10/103	104/18903	2.52e-10	4.82e-09	1.91e-09	AKT1/TNF/HIF1A/TLR4/SIRT1/PARP1/MCL1/ABL1/FYN/NFE2L2	10
BP	GO:0032409	regulation of transporter activity	15/103	326/18903	2.68e-10	5.09e-09	2.02e-09	BCL2/PPARG/MMP9/APP/PRKACA/ITGB1/ABCB1/SNCA/CTSS/DRD2/RXRA/PTK2B/ADRB2/OPRM1/CALM1	15
BP	GO:0043536	positive regulation of blood vessel endothelial cell migration	9/103	75/18903	2.77e-10	5.23e-09	2.08e-09	AKT1/HIF1A/PTGS2/SIRT1/KDR/FGF2/ABL1/PRKCA/NFE2L2	9
BP	GO:0097553	calcium ion transmembrane import into cytosol	12/103	182/18903	3.15e-10	5.93e-09	2.35e-09	BCL2/PTPRC/PRKACA/FGF2/ABL1/FYN/SNCA/GRIN2B/DRD2/PTK2B/CALM1/F2	12
BP	GO:0051384	response to glucocorticoid	11/103	142/18903	3.21e-10	6.03e-09	2.39e-09	TNF/IL6/BCL2/CASP3/PTGS2/CCND1/JAK2/CASP9/ACE/NR3C1/MAOB	11
BP	GO:0001936	regulation of endothelial cell proliferation	12/103	183/18903	3.35e-10	6.26e-09	2.48e-09	AKT1/TNF/STAT3/JUN/HIF1A/PPARG/SIRT1/KDR/FGF2/PRKCA/AGTR1/XDH	12
BP	GO:0048638	regulation of developmental growth	15/103	332/18903	3.45e-10	6.4e-09	2.54e-09	AKT1/STAT3/BCL2/GSK3B/APP/MAPK14/FGF2/CDK4/ABL1/AR/PPARA/CDK1/DRD2/ADRB2/G6PD	15
BP	GO:0010212	response to ionizing radiation	11/103	143/18903	3.47e-10	6.41e-09	2.54e-09	BCL2/CASP3/CCND1/SIRT1/MDM2/BCL2L1/PARP1/GRB2/PTPRC/MAPK14/HSPA5	11
BP	GO:0002534	cytokine production involved in inflammatory response	9/103	77/18903	3.52e-10	6.45e-09	2.56e-09	TNF/IL6/STAT3/HIF1A/TLR4/MAPK14/EZH2/PPARA/F2	9
BP	GO:1900015	regulation of cytokine production involved in inflammatory response	9/103	77/18903	3.52e-10	6.45e-09	2.56e-09	TNF/IL6/STAT3/HIF1A/TLR4/MAPK14/EZH2/PPARA/F2	9
BP	GO:1905952	regulation of lipid localization	12/103	185/18903	3.8e-10	6.94e-09	2.75e-09	AKT1/TNF/IL6/PPARG/SIRT1/NFKBIA/PPARA/PTPN11/REN/AGTR1/CYP19A1/RXRA	12
BP	GO:0043405	regulation of MAP kinase activity	12/103	186/18903	4.05e-10	7.35e-09	2.91e-09	TNF/SRC/EGFR/PPARG/ERBB2/TLR4/PTPRC/FGF2/EZH2/PDGFRB/HMGCR/PTK2B	12
BP	GO:0032386	regulation of intracellular transport	15/103	336/18903	4.07e-10	7.36e-09	2.92e-09	SRC/HSP90AA1/MAPK3/HSP90AB1/PTGS2/ERBB2/GSK3B/MAPK1/JAK2/MAPK14/PRKACA/PTPN11/MAPK8/FYN/CDK1	15
BP	GO:0045165	cell fate commitment	14/103	282/18903	4.12e-10	7.41e-09	2.94e-09	IL6/STAT3/BCL2/CASP3/PPARG/MTOR/KDR/CDC42/FGF2/HDAC1/MCL1/BRAF/AR/ITGB1	14
BP	GO:0007173	epidermal growth factor receptor signaling pathway	10/103	110/18903	4.41e-10	7.91e-09	3.14e-09	AKT1/SRC/EGFR/MMP9/ERBB2/GRB2/BRAF/ABL1/PTPN11/PTK2B	10
BP	GO:0071356	cellular response to tumor necrosis factor	13/103	234/18903	4.59e-10	8.2e-09	3.25e-09	AKT1/TNF/MAPK3/MAPK1/SIRT1/JAK2/RELA/NFKBIA/MAPK14/CASP8/CASP1/NFE2L2/PTK2B	13
BP	GO:0071478	cellular response to radiation	12/103	189/18903	4.87e-10	8.64e-09	3.43e-09	PTGS2/MMP9/SIRT1/EP300/MDM2/BCL2L1/PARP1/GRB2/MAPK14/CREBBP/HSPA5/CASP9	12
BP	GO:0034405	response to fluid shear stress	7/103	34/18903	5.53e-10	9.78e-09	3.88e-09	AKT1/SRC/PTGS2/ACE/PDGFRB/NFE2L2/PTK2B	7
BP	GO:0043535	regulation of blood vessel endothelial cell migration	11/103	150/18903	5.79e-10	1.01e-08	4.02e-09	AKT1/TNF/HIF1A/PPARG/PTGS2/SIRT1/KDR/FGF2/ABL1/PRKCA/NFE2L2	11
BP	GO:1904645	response to amyloid-beta	8/103	55/18903	5.81e-10	1.01e-08	4.02e-09	TNF/MMP9/TLR4/GSK3B/PARP1/APP/FYN/ADRB2	8
BP	GO:0031099	regeneration	12/103	192/18903	5.83e-10	1.01e-08	4.02e-09	TNF/IL6/BCL2/JUN/CCND1/JAK2/EZH2/BRAF/ACE/CDK1/CCNA2/AURKA	12
BP	GO:0031334	positive regulation of protein-containing complex assembly	12/103	192/18903	5.83e-10	1.01e-08	4.02e-09	TNF/SRC/HSP90AA1/ESR1/MTOR/TLR4/GSK3B/GRB2/SNCA/LGALS3/PTK2B/VCP	12
BP	GO:0071456	cellular response to hypoxia	11/103	151/18903	6.22e-10	1.08e-08	4.27e-09	SRC/BCL2/HIF1A/PPARG/PTGS2/MTOR/SIRT1/MDM2/NFE2L2/CCNA2/TERT	11
BP	GO:0070661	leukocyte proliferation	15/103	348/18903	6.6e-10	1.14e-08	4.52e-09	IL6/BCL2/CASP3/MAPK3/ERBB2/TLR4/MAPK1/BCL2L1/JAK2/IL2/PTPRC/ABL1/ACE/FYN/LGALS3	15
BP	GO:0045765	regulation of angiogenesis	15/103	349/18903	6.87e-10	1.18e-08	4.67e-09	TNF/IL6/STAT3/HIF1A/PPARG/ERBB2/SIRT1/KDR/FGF2/ABL1/ITGB1/PRKCA/NFE2L2/TERT/PTK2B	15
BP	GO:0043276	anoikis	7/103	35/18903	6.88e-10	1.18e-08	4.67e-09	AKT1/SRC/BCL2/MTOR/MCL1/ITGB1/NTRK2	7
BP	GO:1903131	mononuclear cell differentiation	17/103	473/18903	7.05e-10	1.2e-08	4.76e-09	IL6/STAT3/BCL2/JUN/PPARG/ERBB2/MTOR/EP300/IL2/PTPRC/EZH2/BRAF/ABL1/ITGB1/FASN/NTRK1/PTK2B	17
BP	GO:0030518	intracellular steroid hormone receptor signaling pathway	10/103	116/18903	7.47e-10	1.27e-08	5.02e-09	SRC/ESR1/SIRT1/EP300/JAK2/PARP1/HDAC1/AR/NR3C1/ESR2	10
BP	GO:0031346	positive regulation of cell projection organization	15/103	352/18903	7.73e-10	1.3e-08	5.17e-09	SRC/HSP90AA1/MTOR/GSK3B/EP300/CDC42/EZH2/BRAF/ABL1/HSPA5/FYN/NFE2L2/NTRK1/NTRK2/PTK2B	15
BP	GO:0043406	positive regulation of MAP kinase activity	10/103	117/18903	8.13e-10	1.36e-08	5.4e-09	TNF/SRC/EGFR/ERBB2/TLR4/PTPRC/FGF2/EZH2/PDGFRB/PTK2B	10
BP	GO:0071887	leukocyte apoptotic process	10/103	117/18903	8.13e-10	1.36e-08	5.4e-09	AKT1/IL6/BCL2/CASP3/HIF1A/SIRT1/BCL2L1/IL2/CASP9/LGALS3	10
BP	GO:0010675	regulation of cellular carbohydrate metabolic process	11/103	155/18903	8.22e-10	1.37e-08	5.44e-09	AKT1/SRC/STAT3/MTOR/GSK3B/SIRT1/EP300/PPARA/NR3C1/SNCA/PTK2B	11
BP	GO:0007159	leukocyte cell-cell adhesion	16/103	414/18903	8.28e-10	1.37e-08	5.45e-09	AKT1/TNF/IL6/SRC/CASP3/ERBB2/JAK2/IL2/RELA/PTPRC/ABL1/PPARA/ITGB1/PTPN11/FYN/LGALS3	16
BP	GO:0071897	DNA biosynthetic process	12/103	198/18903	8.3e-10	1.37e-08	5.45e-09	TNF/SRC/HSP90AA1/MAPK3/HSP90AB1/MAPK1/SIRT1/FGF2/PDGFRB/TERT/PTK2B/VCP	12
BP	GO:1901342	regulation of vasculature development	15/103	355/18903	8.68e-10	1.43e-08	5.67e-09	TNF/IL6/STAT3/HIF1A/PPARG/ERBB2/SIRT1/KDR/FGF2/ABL1/ITGB1/PRKCA/NFE2L2/TERT/PTK2B	15
BP	GO:0001935	endothelial cell proliferation	12/103	199/18903	8.8e-10	1.44e-08	5.72e-09	AKT1/TNF/STAT3/JUN/HIF1A/PPARG/SIRT1/KDR/FGF2/PRKCA/AGTR1/XDH	12
BP	GO:0090316	positive regulation of intracellular protein transport	11/103	157/18903	9.43e-10	1.54e-08	6.11e-09	HSP90AA1/HSP90AB1/PTGS2/ERBB2/GSK3B/JAK2/MAPK14/PRKACA/MAPK8/FYN/CDK1	11
BP	GO:0006970	response to osmotic stress	9/103	86/18903	9.64e-10	1.57e-08	6.22e-09	TNF/HSP90AA1/CASP3/HSP90AB1/PTGS2/MTOR/CASP1/ABCB1/PTK2B	9
BP	GO:0010876	lipid localization	17/103	483/18903	9.69e-10	1.57e-08	6.23e-09	AKT1/TNF/IL6/PPARG/PTGS2/SIRT1/NFKBIA/PPARA/PTPN11/ACE/REN/ABCB1/AGTR1/ABCG2/DRD2/CYP19A1/RXRA	17
BP	GO:0009636	response to toxic substance	13/103	250/18903	1.03e-09	1.67e-08	6.61e-09	TNF/BCL2/PTGS2/PDGFRB/NFE2L2/CDK1/MPO/ABCB1/ABCG2/DRD2/MAOB/PTGS1/GSR	13
BP	GO:0001558	regulation of cell growth	16/103	422/18903	1.09e-09	1.76e-08	6.96e-09	AKT1/EGFR/BCL2/ERBB2/MTOR/GSK3B/SIRT1/IL2/CDC42/ABL1/PPARA/ESR2/AGTR1/PTK2B/G6PD/F2	16
BP	GO:0016241	regulation of macroautophagy	11/103	160/18903	1.15e-09	1.85e-08	7.33e-09	GAPDH/AKT1/CASP3/HIF1A/MAPK3/MTOR/SIRT1/KDR/PRKACA/MAPK8/ADRB2	11
BP	GO:0051353	positive regulation of oxidoreductase activity	8/103	60/18903	1.19e-09	1.9e-08	7.55e-09	AKT1/TNF/HIF1A/ABL1/TERT/AGTR1/SNCA/PTK2B	8
BP	GO:0022407	regulation of cell-cell adhesion	17/103	490/18903	1.21e-09	1.91e-08	7.57e-09	AKT1/TNF/IL6/SRC/CASP3/ERBB2/JAK2/IL2/RELA/PTPRC/MAPK14/ABL1/PPARA/PTPN11/PRKCA/FYN/LGALS3	17
BP	GO:0061564	axon development	17/103	490/18903	1.21e-09	1.91e-08	7.57e-09	HSP90AA1/BCL2/JUN/CASP3/HSP90AB1/ERBB2/GSK3B/JAK2/APP/BRAF/ABL1/ITGB1/PTPN11/FYN/NTRK1/NTRK2/DRD2	17
BP	GO:0048167	regulation of synaptic plasticity	12/103	207/18903	1.38e-09	2.18e-08	8.63e-09	PTGS2/GSK3B/MAPK1/APP/BRAF/ABL1/ACE/SNCA/GRIN2B/NTRK2/DRD2/PTK2B	12
BP	GO:0051100	negative regulation of binding	11/103	164/18903	1.5e-09	2.36e-08	9.34e-09	AKT1/JUN/MAPK3/GSK3B/JAK2/NFKBIA/PPARA/MAPK8/ACE/AURKA/ADRB2	11
BP	GO:0043280	positive regulation of cysteine-type endopeptidase activity involved in apoptotic process	10/103	125/18903	1.56e-09	2.43e-08	9.63e-09	TNF/PPARG/SIRT1/JAK2/CASP8/CASP9/CASP1/SNCA/VCP/XDH	10
BP	GO:0045428	regulation of nitric oxide biosynthetic process	8/103	62/18903	1.56e-09	2.43e-08	9.63e-09	AKT1/TNF/HSP90AA1/HSP90AB1/PTGS2/TLR4/JAK2/PTK2B	8
BP	GO:0046824	positive regulation of nucleocytoplasmic transport	8/103	62/18903	1.56e-09	2.43e-08	9.63e-09	HSP90AA1/HSP90AB1/PTGS2/GSK3B/JAK2/MAPK14/PRKACA/CDK1	8
BP	GO:0032516	positive regulation of phosphoprotein phosphatase activity	6/103	22/18903	1.57e-09	2.43e-08	9.63e-09	HSP90AB1/MTOR/JAK2/PTPRC/PDGFRB/CALM1	6
BP	GO:0003015	heart process	13/103	261/18903	1.74e-09	2.68e-08	1.06e-08	TNF/SRC/HSP90AA1/MTOR/MDM2/JAK2/IL2/CDC42/PRKACA/ACE/FYN/DRD2/CALM1	13
BP	GO:0045927	positive regulation of growth	13/103	261/18903	1.74e-09	2.68e-08	1.06e-08	AKT1/EGFR/BCL2/ERBB2/MTOR/IL2/CDC42/MAPK14/FGF2/CDK1/DRD2/PTK2B/F2	13
BP	GO:0031663	lipopolysaccharide-mediated signaling pathway	8/103	63/18903	1.78e-09	2.72e-08	1.08e-08	AKT1/TNF/MAPK3/TLR4/MAPK1/NFKBIA/MAPK14/PRKCA	8
BP	GO:0032731	positive regulation of interleukin-1 beta production	8/103	63/18903	1.78e-09	2.72e-08	1.08e-08	TNF/IL6/STAT3/TLR4/JAK2/APP/CASP8/CASP1	8
BP	GO:0016236	macroautophagy	14/103	317/18903	1.88e-09	2.85e-08	1.13e-08	GAPDH/AKT1/SRC/CASP3/HIF1A/MAPK3/MTOR/SIRT1/KDR/PRKACA/MAPK8/VCP/ADRB2/CALM1	14
BP	GO:0070301	cellular response to hydrogen peroxide	9/103	93/18903	1.95e-09	2.95e-08	1.17e-08	IL6/SRC/SIRT1/RELA/EZH2/ABL1/FYN/NFE2L2/CDK1	9
BP	GO:1903037	regulation of leukocyte cell-cell adhesion	15/103	377/18903	1.98e-09	2.98e-08	1.18e-08	AKT1/TNF/IL6/SRC/CASP3/ERBB2/JAK2/IL2/RELA/PTPRC/ABL1/PPARA/PTPN11/FYN/LGALS3	15
BP	GO:0060965	negative regulation of miRNA-mediated gene silencing	6/103	23/18903	2.12e-09	3.18e-08	1.26e-08	TNF/IL6/STAT3/ESR1/PPARG/TERT	6
BP	GO:1900542	regulation of purine nucleotide metabolic process	9/103	94/18903	2.15e-09	3.22e-08	1.28e-08	STAT3/HIF1A/MTOR/EP300/PARP1/APP/PPARA/SNCA/VCP	9
BP	GO:0007179	transforming growth factor beta receptor signaling pathway	12/103	216/18903	2.24e-09	3.34e-08	1.32e-08	SRC/STAT3/JUN/PPARG/HSP90AB1/SIRT1/EP300/PARP1/HDAC1/CREBBP/PPARA/HSPA5	12
BP	GO:0042326	negative regulation of phosphorylation	15/103	381/18903	2.28e-09	3.39e-08	1.34e-08	AKT1/STAT3/JUN/CASP3/PPARG/SIRT1/IL2/PTPRC/ABL1/PPARA/HMGCR/SNCA/DRD2/XDH/CALM1	15
BP	GO:0031100	animal organ regeneration	8/103	65/18903	2.3e-09	3.4e-08	1.35e-08	TNF/IL6/CCND1/EZH2/ACE/CDK1/CCNA2/AURKA	8
BP	GO:0080164	regulation of nitric oxide metabolic process	8/103	65/18903	2.3e-09	3.4e-08	1.35e-08	AKT1/TNF/HSP90AA1/HSP90AB1/PTGS2/TLR4/JAK2/PTK2B	8
BP	GO:0010595	positive regulation of endothelial cell migration	10/103	131/18903	2.47e-09	3.63e-08	1.44e-08	AKT1/HIF1A/PTGS2/SIRT1/KDR/FGF2/ABL1/PRKCA/NFE2L2/PTK2B	10
BP	GO:0031647	regulation of protein stability	14/103	325/18903	2.59e-09	3.79e-08	1.5e-08	GAPDH/SRC/HSP90AA1/BCL2/CASP3/HSP90AB1/MAPK1/SIRT1/EP300/MDM2/CREBBP/TERT/AURKA/SNCA	14
BP	GO:0036120	cellular response to platelet-derived growth factor stimulus	6/103	24/18903	2.81e-09	4.05e-08	1.61e-08	SRC/TLR4/HDAC1/PDGFRB/FYN/CCNA2	6
BP	GO:0060149	negative regulation of post-transcriptional gene silencing	6/103	24/18903	2.81e-09	4.05e-08	1.61e-08	TNF/IL6/STAT3/ESR1/PPARG/TERT	6
BP	GO:0060967	negative regulation of gene silencing by RNA	6/103	24/18903	2.81e-09	4.05e-08	1.61e-08	TNF/IL6/STAT3/ESR1/PPARG/TERT	6
BP	GO:1900369	negative regulation of post-transcriptional gene silencing by RNA	6/103	24/18903	2.81e-09	4.05e-08	1.61e-08	TNF/IL6/STAT3/ESR1/PPARG/TERT	6
BP	GO:0051960	regulation of nervous system development	16/103	456/18903	3.32e-09	4.75e-08	1.88e-08	AKT1/TNF/IL6/HIF1A/MTOR/FGF2/EZH2/HDAC1/BRAF/ITGB1/ACE/NTRK1/NTRK2/DRD2/OPRM1/F2	16
BP	GO:0038034	signal transduction in absence of ligand	8/103	68/18903	3.33e-09	4.75e-08	1.88e-08	AKT1/TNF/BCL2/GSK3B/BCL2L1/IL2/MCL1/TERT	8
BP	GO:0097192	extrinsic apoptotic signaling pathway in absence of ligand	8/103	68/18903	3.33e-09	4.75e-08	1.88e-08	AKT1/TNF/BCL2/GSK3B/BCL2L1/IL2/MCL1/TERT	8
BP	GO:0009895	negative regulation of catabolic process	14/103	332/18903	3.4e-09	4.84e-08	1.92e-08	AKT1/TNF/EGFR/STAT3/BCL2/HSP90AB1/MTOR/RELA/MAPK14/MCL1/PPARA/FYN/HMGCR/SNCA	14
BP	GO:0006140	regulation of nucleotide metabolic process	9/103	99/18903	3.42e-09	4.84e-08	1.92e-08	STAT3/HIF1A/MTOR/EP300/PARP1/APP/PPARA/SNCA/VCP	9
BP	GO:0043279	response to alkaloid	9/103	99/18903	3.42e-09	4.84e-08	1.92e-08	HSP90AA1/CASP3/HSP90AB1/BCL2L1/HSPA5/CCNA2/DRD2/PTK2B/OPRM1	9
BP	GO:0033157	regulation of intracellular protein transport	12/103	225/18903	3.56e-09	5.01e-08	1.99e-08	HSP90AA1/HSP90AB1/PTGS2/ERBB2/GSK3B/JAK2/MAPK14/PRKACA/PTPN11/MAPK8/FYN/CDK1	12
BP	GO:0002532	production of molecular mediator involved in inflammatory response	9/103	100/18903	3.74e-09	5.25e-08	2.08e-08	TNF/IL6/STAT3/HIF1A/TLR4/MAPK14/EZH2/PPARA/F2	9
BP	GO:0051962	positive regulation of nervous system development	13/103	279/18903	3.91e-09	5.47e-08	2.17e-08	TNF/IL6/HIF1A/MTOR/FGF2/HDAC1/BRAF/ITGB1/ACE/NTRK1/NTRK2/DRD2/OPRM1	13
BP	GO:0050900	leukocyte migration	15/103	398/18903	4.12e-09	5.74e-08	2.28e-08	AKT1/TNF/IL6/SRC/MAPK3/MMP9/MAPK1/APP/CDC42/ABL1/ITGB1/FYN/LGALS3/CYP19A1/PTK2B	15
BP	GO:0051881	regulation of mitochondrial membrane potential	8/103	70/18903	4.21e-09	5.85e-08	2.32e-08	AKT1/SRC/BCL2/BCL2L1/KDR/PARP1/ABL1/VCP	8
BP	GO:0043542	endothelial cell migration	13/103	281/18903	4.26e-09	5.9e-08	2.34e-08	AKT1/TNF/HIF1A/PPARG/PTGS2/SIRT1/KDR/FGF2/ABL1/ITGB1/PRKCA/NFE2L2/PTK2B	13
BP	GO:0060964	regulation of miRNA-mediated gene silencing	7/103	45/18903	4.44e-09	6.11e-08	2.42e-08	TNF/IL6/EGFR/STAT3/ESR1/PPARG/TERT	7
BP	GO:1904646	cellular response to amyloid-beta	7/103	45/18903	4.44e-09	6.11e-08	2.42e-08	TNF/TLR4/GSK3B/PARP1/APP/FYN/ADRB2	7
BP	GO:0010594	regulation of endothelial cell migration	12/103	230/18903	4.56e-09	6.24e-08	2.48e-08	AKT1/TNF/HIF1A/PPARG/PTGS2/SIRT1/KDR/FGF2/ABL1/PRKCA/NFE2L2/PTK2B	12
BP	GO:0036119	response to platelet-derived growth factor	6/103	26/18903	4.76e-09	6.48e-08	2.57e-08	SRC/TLR4/HDAC1/PDGFRB/FYN/CCNA2	6
BP	GO:1903798	regulation of miRNA maturation	6/103	26/18903	4.76e-09	6.48e-08	2.57e-08	TNF/IL6/EGFR/STAT3/ESR1/TERT	6
BP	GO:0050769	positive regulation of neurogenesis	12/103	231/18903	4.79e-09	6.49e-08	2.57e-08	TNF/IL6/HIF1A/MTOR/FGF2/HDAC1/BRAF/ITGB1/ACE/NTRK2/DRD2/OPRM1	12
BP	GO:0023061	signal release	16/103	470/18903	5.1e-09	6.9e-08	2.74e-08	TNF/IL6/HIF1A/PPARG/PTGS2/GSK3B/JAK2/BRAF/PTPN11/REN/AGTR1/SNCA/DRD2/MAOB/CYP19A1/OPRM1	16
BP	GO:0070588	calcium ion transmembrane transport	14/103	345/18903	5.56e-09	7.49e-08	2.97e-08	BCL2/PTPRC/PRKACA/FGF2/ABL1/FYN/SNCA/GRIN2B/DRD2/PTK2B/OPRM1/G6PD/CALM1/F2	14
BP	GO:0044772	mitotic cell cycle phase transition	16/103	473/18903	5.58e-09	7.5e-08	2.97e-08	AKT1/EGFR/BCL2/CCND1/MDM2/APP/EZH2/CDK4/CDK2/ITGB1/CDK1/CCNA2/TERT/ABCB1/AURKA/CALM1	16
BP	GO:0007249	I-kappaB kinase/NF-kappaB signaling	13/103	288/18903	5.73e-09	7.66e-08	3.04e-08	GAPDH/AKT1/TNF/ESR1/TLR4/SIRT1/RELA/NFKBIA/HDAC1/CASP8/ABL1/CASP1/FYN	13
BP	GO:0008585	female gonad development	9/103	105/18903	5.78e-09	7.69e-08	3.05e-08	SRC/BCL2/CASP3/ESR1/SIRT1/BCL2L1/KDR/HSPA5/CYP19A1	9
BP	GO:1901655	cellular response to ketone	9/103	105/18903	5.78e-09	7.69e-08	3.05e-08	AKT1/SRC/SIRT1/JAK2/CDK4/AR/CASP9/ACE/NR3C1	9
BP	GO:1903578	regulation of ATP metabolic process	8/103	73/18903	5.92e-09	7.84e-08	3.11e-08	STAT3/HIF1A/MTOR/EP300/PARP1/APP/PPARA/VCP	8
BP	GO:0043270	positive regulation of ion transport	13/103	289/18903	5.97e-09	7.85e-08	3.11e-08	AKT1/ABL1/ITGB1/PDGFRB/ABCB1/SNCA/LGALS3/CTSS/DRD2/ADRB2/G6PD/CALM1/F2	13
BP	GO:0045766	positive regulation of angiogenesis	11/103	187/18903	5.98e-09	7.85e-08	3.11e-08	STAT3/HIF1A/SIRT1/KDR/FGF2/ABL1/ITGB1/PRKCA/NFE2L2/TERT/PTK2B	11
BP	GO:1904018	positive regulation of vasculature development	11/103	187/18903	5.98e-09	7.85e-08	3.11e-08	STAT3/HIF1A/SIRT1/KDR/FGF2/ABL1/ITGB1/PRKCA/NFE2L2/TERT/PTK2B	11
BP	GO:0001774	microglial cell activation	7/103	47/18903	6.1e-09	7.96e-08	3.16e-08	TNF/IL6/JUN/JAK2/APP/PTPRC/SNCA	7
BP	GO:1900368	regulation of post-transcriptional gene silencing by RNA	7/103	47/18903	6.1e-09	7.96e-08	3.16e-08	TNF/IL6/EGFR/STAT3/ESR1/PPARG/TERT	7
BP	GO:0022898	regulation of transmembrane transporter activity	13/103	291/18903	6.48e-09	8.43e-08	3.34e-08	BCL2/MMP9/APP/PRKACA/ITGB1/ABCB1/SNCA/CTSS/DRD2/PTK2B/ADRB2/OPRM1/CALM1	13
BP	GO:0032732	positive regulation of interleukin-1 production	8/103	74/18903	6.6e-09	8.56e-08	3.39e-08	TNF/IL6/STAT3/TLR4/JAK2/APP/CASP8/CASP1	8
BP	GO:0051051	negative regulation of transport	16/103	479/18903	6.68e-09	8.62e-08	3.42e-08	AKT1/TNF/BCL2/PTGS2/MMP9/BRAF/PTPN11/ACE/HMGCR/SNCA/LGALS3/DRD2/MAOB/PTK2B/OPRM1/CALM1	16
BP	GO:1903706	regulation of hemopoiesis	15/103	413/18903	6.79e-09	8.74e-08	3.46e-08	TNF/STAT3/HIF1A/ERBB2/MTOR/TLR4/IL2/NFKBIA/PTPRC/MAPK14/CASP8/BRAF/ABL1/PRKCA/PTK2B	15
BP	GO:0042220	response to cocaine	7/103	48/18903	7.11e-09	9.1e-08	3.61e-08	HSP90AA1/HSP90AB1/HSPA5/CCNA2/DRD2/PTK2B/OPRM1	7
BP	GO:0060147	regulation of post-transcriptional gene silencing	7/103	48/18903	7.11e-09	9.1e-08	3.61e-08	TNF/IL6/EGFR/STAT3/ESR1/PPARG/TERT	7
BP	GO:0045088	regulation of innate immune response	12/103	240/18903	7.35e-09	9.38e-08	3.72e-08	SRC/HSP90AA1/PPARG/TLR4/EP300/PARP1/CASP8/CREBBP/PTPN11/FYN/NFE2L2/DRD2	12
BP	GO:0051341	regulation of oxidoreductase activity	9/103	108/18903	7.43e-09	9.44e-08	3.75e-08	AKT1/TNF/EGFR/HIF1A/ABL1/TERT/AGTR1/SNCA/PTK2B	9
BP	GO:0008217	regulation of blood pressure	11/103	191/18903	7.46e-09	9.46e-08	3.75e-08	TNF/PPARG/PTGS2/AR/PPARA/ACE/REN/AGTR1/DRD2/PTGS1/ADRB2	11
BP	GO:0035264	multicellular organism growth	10/103	147/18903	7.56e-09	9.56e-08	3.79e-08	STAT3/BCL2/MTOR/EP300/APP/CDK4/AR/PTPN11/DRD2/ADRB2	10
BP	GO:0070920	regulation of production of small RNA involved in gene silencing by RNA	6/103	28/18903	7.72e-09	9.73e-08	3.86e-08	TNF/IL6/EGFR/STAT3/ESR1/TERT	6
BP	GO:0048872	homeostasis of number of cells	13/103	296/18903	7.95e-09	9.98e-08	3.96e-08	AKT1/IL6/STAT3/BCL2/CASP3/HIF1A/JAK2/IL2/MAPK14/EZH2/ABL1/PTPN11/G6PD	13
BP	GO:0046545	development of primary female sexual characteristics	9/103	109/18903	8.06e-09	1.01e-07	3.99e-08	SRC/BCL2/CASP3/ESR1/SIRT1/BCL2L1/KDR/HSPA5/CYP19A1	9
BP	GO:0046822	regulation of nucleocytoplasmic transport	9/103	109/18903	8.06e-09	1.01e-07	3.99e-08	HSP90AA1/HSP90AB1/PTGS2/GSK3B/JAK2/MAPK14/PRKACA/PTPN11/CDK1	9
BP	GO:0006809	nitric oxide biosynthetic process	8/103	76/18903	8.19e-09	1.02e-07	4.04e-08	AKT1/TNF/HSP90AA1/HSP90AB1/PTGS2/TLR4/JAK2/PTK2B	8
BP	GO:0016032	viral process	15/103	421/18903	8.78e-09	1.09e-07	4.32e-08	TNF/EGFR/BCL2/JUN/HSP90AB1/GSK3B/EP300/BCL2L1/HDAC1/PPARA/ITGB1/CDK1/CTSB/AGTR1/VCP	15
BP	GO:0006919	activation of cysteine-type endopeptidase activity involved in apoptotic process	8/103	77/18903	9.1e-09	1.12e-07	4.45e-08	TNF/PPARG/JAK2/CASP8/CASP9/SNCA/VCP/XDH	8
BP	GO:0010827	regulation of glucose transmembrane transport	8/103	77/18903	9.1e-09	1.12e-07	4.45e-08	AKT1/TNF/MAPK14/BRAF/PTPN11/ACE/NFE2L2/TERT	8
BP	GO:0007612	learning	10/103	150/18903	9.19e-09	1.13e-07	4.47e-08	HIF1A/PTGS2/APP/BRAF/ABL1/ITGB1/FYN/HMGCR/NTRK2/DRD2	10
BP	GO:0010821	regulation of mitochondrion organization	10/103	150/18903	9.19e-09	1.13e-07	4.47e-08	AKT1/HIF1A/PPARG/MMP9/GSK3B/EP300/BCL2L1/KDR/MAPK8/AURKA	10
BP	GO:0002269	leukocyte activation involved in inflammatory response	7/103	50/18903	9.56e-09	1.16e-07	4.61e-08	TNF/IL6/JUN/JAK2/APP/PTPRC/SNCA	7
BP	GO:0060966	regulation of gene silencing by RNA	7/103	50/18903	9.56e-09	1.16e-07	4.61e-08	TNF/IL6/EGFR/STAT3/ESR1/PPARG/TERT	7
BP	GO:1904707	positive regulation of vascular associated smooth muscle cell proliferation	7/103	50/18903	9.56e-09	1.16e-07	4.61e-08	TNF/SRC/JUN/MMP9/JAK2/FGF2/TERT	7
BP	GO:1902175	regulation of oxidative stress-induced intrinsic apoptotic signaling pathway	6/103	29/18903	9.69e-09	1.17e-07	4.66e-08	AKT1/HIF1A/SIRT1/PARP1/MCL1/NFE2L2	6
BP	GO:0002831	regulation of response to biotic stimulus	14/103	361/18903	9.89e-09	1.19e-07	4.73e-08	SRC/HSP90AA1/MAPK3/PPARG/TLR4/EP300/PARP1/CASP8/CREBBP/PTPN11/PRKCA/FYN/NFE2L2/DRD2	14
BP	GO:0045913	positive regulation of carbohydrate metabolic process	8/103	78/18903	1.01e-08	1.22e-07	4.82e-08	AKT1/SRC/HIF1A/MTOR/SIRT1/APP/PPARA/SNCA	8
BP	GO:0030183	B cell differentiation	10/103	152/18903	1.04e-08	1.25e-07	4.97e-08	IL6/BCL2/EP300/IL2/PTPRC/EZH2/ABL1/ITGB1/NTRK1/PTK2B	10
BP	GO:0030225	macrophage differentiation	7/103	51/18903	1.1e-08	1.32e-07	5.24e-08	MMP9/SIRT1/PARP1/APP/CDC42/CASP8/PRKCA	7
BP	GO:0032388	positive regulation of intracellular transport	11/103	199/18903	1.14e-08	1.37e-07	5.42e-08	HSP90AA1/HSP90AB1/PTGS2/ERBB2/GSK3B/JAK2/MAPK14/PRKACA/MAPK8/FYN/CDK1	11
BP	GO:0034329	cell junction assembly	15/103	430/18903	1.16e-08	1.39e-07	5.49e-08	TNF/SRC/BCL2/KDR/APP/CDC42/PRKACA/ABL1/PRKCA/ACE/NTRK1/SNCA/NTRK2/DRD2/PTK2B	15
BP	GO:0032368	regulation of lipid transport	10/103	155/18903	1.26e-08	1.49e-07	5.93e-08	AKT1/PPARG/SIRT1/NFKBIA/PPARA/PTPN11/REN/AGTR1/CYP19A1/RXRA	10
BP	GO:0006869	lipid transport	15/103	433/18903	1.28e-08	1.51e-07	5.99e-08	AKT1/PPARG/PTGS2/SIRT1/NFKBIA/PPARA/PTPN11/ACE/REN/ABCB1/AGTR1/ABCG2/DRD2/CYP19A1/RXRA	15
BP	GO:0001938	positive regulation of endothelial cell proliferation	9/103	115/18903	1.29e-08	1.53e-07	6.05e-08	AKT1/STAT3/JUN/HIF1A/SIRT1/KDR/FGF2/PRKCA/AGTR1	9
BP	GO:0010976	positive regulation of neuron projection development	10/103	157/18903	1.43e-08	1.68e-07	6.65e-08	EP300/EZH2/BRAF/ABL1/HSPA5/FYN/NFE2L2/NTRK1/NTRK2/PTK2B	10
BP	GO:0048146	positive regulation of fibroblast proliferation	7/103	53/18903	1.46e-08	1.71e-07	6.77e-08	EGFR/JUN/ESR1/CDK4/ABL1/PDGFRB/CCNA2	7
BP	GO:0032943	mononuclear cell proliferation	13/103	312/18903	1.49e-08	1.74e-07	6.89e-08	IL6/BCL2/CASP3/ERBB2/TLR4/BCL2L1/JAK2/IL2/PTPRC/ABL1/ACE/FYN/LGALS3	13
BP	GO:0010039	response to iron ion	6/103	31/18903	1.49e-08	1.74e-07	6.89e-08	BCL2/HIF1A/CCND1/SNCA/DRD2/G6PD	6
BP	GO:0046209	nitric oxide metabolic process	8/103	82/18903	1.51e-08	1.75e-07	6.95e-08	AKT1/TNF/HSP90AA1/HSP90AB1/PTGS2/TLR4/JAK2/PTK2B	8
BP	GO:0035051	cardiocyte differentiation	10/103	159/18903	1.61e-08	1.87e-07	7.4e-08	EGFR/MAPK3/MTOR/MAPK1/CDC42/PPARA/ITGB1/PDGFRB/CDK1/G6PD	10
BP	GO:0006096	glycolytic process	8/103	83/18903	1.66e-08	1.91e-07	7.59e-08	GAPDH/STAT3/HIF1A/MTOR/EP300/APP/PPARA/LDHA	8
BP	GO:2001057	reactive nitrogen species metabolic process	8/103	83/18903	1.66e-08	1.91e-07	7.59e-08	AKT1/TNF/HSP90AA1/HSP90AB1/PTGS2/TLR4/JAK2/PTK2B	8
BP	GO:0061900	glial cell activation	7/103	54/18903	1.67e-08	1.91e-07	7.59e-08	TNF/IL6/JUN/JAK2/APP/PTPRC/SNCA	7
BP	GO:0050767	regulation of neurogenesis	14/103	377/18903	1.71e-08	1.96e-07	7.77e-08	TNF/IL6/HIF1A/MTOR/FGF2/EZH2/HDAC1/BRAF/ITGB1/ACE/NTRK2/DRD2/OPRM1/F2	14
BP	GO:1903799	negative regulation of miRNA maturation	5/103	16/18903	1.81e-08	2.07e-07	8.22e-08	TNF/IL6/STAT3/ESR1/TERT	5
BP	GO:0006757	ATP generation from ADP	8/103	84/18903	1.83e-08	2.08e-07	8.26e-08	GAPDH/STAT3/HIF1A/MTOR/EP300/APP/PPARA/LDHA	8
BP	GO:0006470	protein dephosphorylation	12/103	261/18903	1.87e-08	2.13e-07	8.44e-08	TNF/BCL2/HSP90AB1/MTOR/GSK3B/JAK2/PTPRC/PTPN11/PDGFRB/LGALS3/DRD2/CALM1	12
BP	GO:0042752	regulation of circadian rhythm	9/103	120/18903	1.88e-08	2.13e-07	8.46e-08	PPARG/MTOR/GSK3B/PARP1/EZH2/PPARA/MAPK8/CDK1/DRD2	9
BP	GO:0050807	regulation of synapse organization	11/103	209/18903	1.9e-08	2.15e-07	8.53e-08	TNF/APP/MAPK14/ABL1/FYN/NTRK1/SNCA/GRIN2B/NTRK2/DRD2/VCP	11
BP	GO:0031668	cellular response to extracellular stimulus	12/103	262/18903	1.95e-08	2.2e-07	8.74e-08	BCL2/MAPK3/MTOR/MAPK1/SIRT1/PTPRC/PPARA/MAPK8/HSPA5/NFE2L2/RXRA/COMT	12
BP	GO:0051101	regulation of DNA binding	9/103	121/18903	2.02e-08	2.27e-07	9e-08	JUN/PPARG/MMP9/EP300/JAK2/PARP1/NFKBIA/MAPK8/CALM1	9
BP	GO:2000278	regulation of DNA biosynthetic process	9/103	121/18903	2.02e-08	2.27e-07	9e-08	TNF/SRC/HSP90AA1/MAPK3/HSP90AB1/MAPK1/FGF2/PDGFRB/PTK2B	9
BP	GO:1903522	regulation of blood circulation	12/103	263/18903	2.04e-08	2.28e-07	9.04e-08	TNF/HSP90AA1/PTGS2/MDM2/JAK2/IL2/PRKACA/ABL1/ACE/AGTR1/DRD2/CALM1	12
BP	GO:0002683	negative regulation of immune system process	15/103	449/18903	2.07e-08	2.31e-07	9.15e-08	AKT1/TNF/SRC/CASP3/PPARG/ERBB2/TLR4/IL2/PARP1/PTPRC/MAPK14/FYN/LGALS3/DRD2/CYP19A1	15
BP	GO:0030278	regulation of ossification	9/103	122/18903	2.17e-08	2.41e-07	9.56e-08	BCL2/HIF1A/MAPK3/MAPK1/MAPK14/PTPN11/RXRA/PTK2B/ADRB2	9
BP	GO:1901989	positive regulation of cell cycle phase transition	9/103	122/18903	2.17e-08	2.41e-07	9.56e-08	AKT1/EGFR/CCND1/MDM2/APP/EZH2/CDK4/CDK1/TERT	9
BP	GO:0032092	positive regulation of protein binding	8/103	86/18903	2.2e-08	2.44e-07	9.66e-08	HSP90AB1/MMP9/GSK3B/EP300/APP/ABL1/ACE/TERT	8
BP	GO:0032768	regulation of monooxygenase activity	7/103	57/18903	2.45e-08	2.71e-07	1.07e-07	AKT1/TNF/EGFR/HIF1A/TERT/SNCA/PTK2B	7
BP	GO:0046660	female sex differentiation	9/103	124/18903	2.51e-08	2.74e-07	1.09e-07	SRC/BCL2/CASP3/ESR1/SIRT1/BCL2L1/KDR/HSPA5/CYP19A1	9
BP	GO:0051209	release of sequestered calcium ion into cytosol	9/103	124/18903	2.51e-08	2.74e-07	1.09e-07	PTPRC/PRKACA/FGF2/ABL1/SNCA/DRD2/PTK2B/CALM1/F2	9
BP	GO:0060079	excitatory postsynaptic potential	9/103	124/18903	2.51e-08	2.74e-07	1.09e-07	AKT1/GSK3B/APP/SNCA/GRIN2B/DRD2/PTK2B/ADRB2/OPRM1	9
BP	GO:0050803	regulation of synapse structure or activity	11/103	215/18903	2.55e-08	2.78e-07	1.1e-07	TNF/APP/MAPK14/ABL1/FYN/NTRK1/SNCA/GRIN2B/NTRK2/DRD2/VCP	11
BP	GO:1900034	regulation of cellular response to heat	5/103	17/18903	2.56e-08	2.78e-07	1.1e-07	MTOR/GSK3B/SIRT1/EP300/CREBBP	5
BP	GO:0043271	negative regulation of ion transport	10/103	167/18903	2.57e-08	2.79e-07	1.11e-07	TNF/BCL2/PTGS2/MMP9/ACE/SNCA/DRD2/MAOB/PTK2B/CALM1	10
BP	GO:0032868	response to insulin	12/103	269/18903	2.62e-08	2.82e-07	1.12e-07	AKT1/SRC/PPARG/MTOR/GSK3B/SIRT1/PARP1/GRB2/MAPK14/CDK4/PPARA/PTPN11	12
BP	GO:0070663	regulation of leukocyte proliferation	12/103	269/18903	2.62e-08	2.82e-07	1.12e-07	IL6/BCL2/CASP3/MAPK3/ERBB2/TLR4/MAPK1/BCL2L1/JAK2/IL2/PTPRC/LGALS3	12
BP	GO:0051283	negative regulation of sequestering of calcium ion	9/103	125/18903	2.69e-08	2.9e-07	1.15e-07	PTPRC/PRKACA/FGF2/ABL1/SNCA/DRD2/PTK2B/CALM1/F2	9
BP	GO:0048678	response to axon injury	8/103	89/18903	2.89e-08	3.11e-07	1.23e-07	BCL2/JUN/JAK2/FGF2/BRAF/CDK1/NTRK1/DRD2	8
BP	GO:0051282	regulation of sequestering of calcium ion	9/103	127/18903	3.09e-08	3.31e-07	1.31e-07	PTPRC/PRKACA/FGF2/ABL1/SNCA/DRD2/PTK2B/CALM1/F2	9
BP	GO:0046324	regulation of glucose import	7/103	59/18903	3.14e-08	3.35e-07	1.33e-07	AKT1/TNF/MAPK14/PTPN11/ACE/NFE2L2/TERT	7
BP	GO:0060249	anatomical structure homeostasis	13/103	333/18903	3.21e-08	3.42e-07	1.36e-07	IL6/SRC/BCL2/HIF1A/PTGS2/TLR4/KDR/APP/ITGB1/PTPN11/PRKCA/PTK2B/ADRB2	13
BP	GO:1901099	negative regulation of signal transduction in absence of ligand	6/103	35/18903	3.23e-08	3.42e-07	1.36e-07	AKT1/TNF/BCL2/BCL2L1/MCL1/TERT	6
BP	GO:2001240	negative regulation of extrinsic apoptotic signaling pathway in absence of ligand	6/103	35/18903	3.23e-08	3.42e-07	1.36e-07	AKT1/TNF/BCL2/BCL2L1/MCL1/TERT	6
BP	GO:1905475	regulation of protein localization to membrane	10/103	172/18903	3.41e-08	3.6e-07	1.43e-07	AKT1/TNF/EGFR/ERBB2/BCL2L1/AR/ITGB1/MAPK8/FYN/LGALS3	10
BP	GO:2000811	negative regulation of anoikis	5/103	18/18903	3.53e-08	3.72e-07	1.47e-07	SRC/BCL2/MCL1/ITGB1/NTRK2	5
BP	GO:0046031	ADP metabolic process	8/103	92/18903	3.76e-08	3.96e-07	1.57e-07	GAPDH/STAT3/HIF1A/MTOR/EP300/APP/PPARA/LDHA	8
BP	GO:0099565	chemical synaptic transmission, postsynaptic	9/103	130/18903	3.79e-08	3.97e-07	1.58e-07	AKT1/GSK3B/APP/SNCA/GRIN2B/DRD2/PTK2B/ADRB2/OPRM1	9
BP	GO:0001933	negative regulation of protein phosphorylation	13/103	338/18903	3.82e-08	3.99e-07	1.58e-07	AKT1/JUN/CASP3/PPARG/SIRT1/IL2/PTPRC/ABL1/HMGCR/SNCA/DRD2/XDH/CALM1	13
BP	GO:0090287	regulation of cellular response to growth factor stimulus	13/103	338/18903	3.82e-08	3.99e-07	1.58e-07	HIF1A/PPARG/HSP90AB1/SIRT1/EP300/KDR/FGF2/HDAC1/CREBBP/ABL1/PPARA/HSPA5/XDH	13
BP	GO:0010922	positive regulation of phosphatase activity	6/103	36/18903	3.85e-08	4e-07	1.59e-07	HSP90AB1/MTOR/JAK2/PTPRC/PDGFRB/CALM1	6
BP	GO:0090218	positive regulation of lipid kinase activity	6/103	36/18903	3.85e-08	4e-07	1.59e-07	SRC/CDC42/FGF2/PDGFRB/PTK2B/F2	6
BP	GO:0009267	cellular response to starvation	10/103	175/18903	4.01e-08	4.15e-07	1.65e-07	BCL2/MAPK3/MTOR/MAPK1/SIRT1/PPARA/MAPK8/HSPA5/NFE2L2/COMT	10
BP	GO:0051208	sequestering of calcium ion	9/103	131/18903	4.05e-08	4.18e-07	1.66e-07	PTPRC/PRKACA/FGF2/ABL1/SNCA/DRD2/PTK2B/CALM1/F2	9
BP	GO:1904705	regulation of vascular associated smooth muscle cell proliferation	8/103	93/18903	4.1e-08	4.22e-07	1.67e-07	TNF/SRC/JUN/PPARG/MMP9/JAK2/FGF2/TERT	8
BP	GO:0051651	maintenance of location in cell	11/103	226/18903	4.25e-08	4.37e-07	1.73e-07	AKT1/PTPRC/PRKACA/FGF2/ABL1/HSPA5/SNCA/DRD2/PTK2B/CALM1/F2	11
BP	GO:1903409	reactive oxygen species biosynthetic process	7/103	62/18903	4.46e-08	4.56e-07	1.81e-07	TLR4/PPARA/FYN/MPO/SNCA/MAOB/CYP1A2	7
BP	GO:1904036	negative regulation of epithelial cell apoptotic process	7/103	62/18903	4.46e-08	4.56e-07	1.81e-07	BCL2/KDR/BRAF/ABL1/PPARA/NFE2L2/TERT	7
BP	GO:1990874	vascular associated smooth muscle cell proliferation	8/103	95/18903	4.85e-08	4.95e-07	1.96e-07	TNF/SRC/JUN/PPARG/MMP9/JAK2/FGF2/TERT	8
BP	GO:0048771	tissue remodeling	10/103	179/18903	4.97e-08	5.06e-07	2.01e-07	IL6/SRC/HIF1A/PPARG/MDM2/IL2/PRKCA/ACE/PTK2B/ADRB2	10
BP	GO:0035270	endocrine system development	9/103	135/18903	5.26e-08	5.33e-07	2.11e-07	AKT1/IL6/MAPK3/GSK3B/MAPK1/FGF2/BRAF/NR3C1/DRD2	9
BP	GO:0032091	negative regulation of protein binding	8/103	96/18903	5.27e-08	5.33e-07	2.11e-07	AKT1/MAPK3/GSK3B/PPARA/MAPK8/ACE/AURKA/ADRB2	8
BP	GO:0031669	cellular response to nutrient levels	11/103	231/18903	5.32e-08	5.37e-07	2.13e-07	BCL2/MAPK3/MTOR/MAPK1/SIRT1/PPARA/MAPK8/HSPA5/NFE2L2/RXRA/COMT	11
BP	GO:0043368	positive T cell selection	6/103	38/18903	5.41e-08	5.45e-07	2.16e-07	IL6/STAT3/BCL2/MTOR/PTPRC/BRAF	6
BP	GO:0042770	signal transduction in response to DNA damage	10/103	181/18903	5.52e-08	5.55e-07	2.2e-07	CCND1/SIRT1/MDM2/GRB2/MAPK14/ABL1/CDK2/PTPN11/CASP9/CDK1	10
BP	GO:0035306	positive regulation of dephosphorylation	7/103	64/18903	5.59e-08	5.6e-07	2.22e-07	SRC/HSP90AB1/MTOR/JAK2/PTPRC/PDGFRB/CALM1	7
BP	GO:0042113	B cell activation	13/103	350/18903	5.75e-08	5.75e-07	2.28e-07	IL6/BCL2/CASP3/TLR4/EP300/IL2/PTPRC/EZH2/CASP8/ABL1/ITGB1/NTRK1/PTK2B	13
BP	GO:0090092	regulation of transmembrane receptor protein serine/threonine kinase signaling pathway	12/103	290/18903	5.98e-08	5.96e-07	2.36e-07	PPARG/HSP90AB1/SIRT1/EP300/JAK2/KDR/PARP1/HDAC1/CREBBP/ABL1/PPARA/HSPA5	12
BP	GO:0097696	receptor signaling pathway via STAT	10/103	183/18903	6.12e-08	6.09e-07	2.42e-07	TNF/IL6/STAT3/PPARG/JAK2/IL2/PTPRC/FYN/PTK2B/F2	10
BP	GO:0048857	neural nucleus development	7/103	65/18903	6.23e-08	6.17e-07	2.45e-07	BCL2/CDC42/FGF2/HSPA5/MAOB/G6PD/CALM1	7
BP	GO:1905953	negative regulation of lipid localization	7/103	65/18903	6.23e-08	6.17e-07	2.45e-07	AKT1/TNF/IL6/PPARG/NFKBIA/PPARA/PTPN11	7
BP	GO:0051882	mitochondrial depolarization	5/103	20/18903	6.33e-08	6.25e-07	2.48e-07	SRC/BCL2/KDR/PARP1/ABL1	5
BP	GO:0030098	lymphocyte differentiation	14/103	419/18903	6.37e-08	6.28e-07	2.49e-07	IL6/STAT3/BCL2/ERBB2/MTOR/EP300/IL2/PTPRC/EZH2/BRAF/ABL1/ITGB1/NTRK1/PTK2B	14
BP	GO:0010517	regulation of phospholipase activity	7/103	66/18903	6.94e-08	6.82e-07	2.71e-07	EGFR/ESR1/FGF2/ABL1/PDGFRB/AGTR1/SNCA	7
BP	GO:0016311	dephosphorylation	13/103	357/18903	7.24e-08	7.08e-07	2.81e-07	TNF/SRC/BCL2/HSP90AB1/MTOR/GSK3B/JAK2/PTPRC/PTPN11/PDGFRB/LGALS3/DRD2/CALM1	13
BP	GO:0006165	nucleoside diphosphate phosphorylation	8/103	100/18903	7.26e-08	7.08e-07	2.81e-07	GAPDH/STAT3/HIF1A/MTOR/EP300/APP/PPARA/LDHA	8
BP	GO:1901992	positive regulation of mitotic cell cycle phase transition	8/103	100/18903	7.26e-08	7.08e-07	2.81e-07	AKT1/EGFR/CCND1/MDM2/APP/CDK4/CDK1/TERT	8
BP	GO:0042307	positive regulation of protein import into nucleus	6/103	40/18903	7.46e-08	7.26e-07	2.88e-07	HSP90AA1/HSP90AB1/PTGS2/JAK2/MAPK14/CDK1	6
BP	GO:0044262	cellular carbohydrate metabolic process	12/103	296/18903	7.48e-08	7.26e-07	2.88e-07	AKT1/SRC/STAT3/MTOR/GSK3B/SIRT1/EP300/BRAF/PPARA/NR3C1/SNCA/PTK2B	12
BP	GO:0030324	lung development	10/103	187/18903	7.51e-08	7.26e-07	2.88e-07	TNF/MAPK3/MAPK1/EP300/KDR/CDC42/FGF2/ACE/PDGFRB/CYP1A2	10
BP	GO:0048469	cell maturation	10/103	187/18903	7.51e-08	7.26e-07	2.88e-07	BCL2/HIF1A/PPARG/KDR/APP/PRKACA/REN/AURKA/PTK2B/G6PD	10
BP	GO:1905477	positive regulation of protein localization to membrane	8/103	101/18903	7.85e-08	7.57e-07	3e-07	AKT1/TNF/EGFR/ERBB2/ITGB1/MAPK8/FYN/LGALS3	8
BP	GO:0006006	glucose metabolic process	10/103	188/18903	7.89e-08	7.58e-07	3e-07	GAPDH/AKT1/TNF/SRC/SIRT1/EP300/MAPK14/PPARA/NR3C1/G6PD	10
BP	GO:1903169	regulation of calcium ion transmembrane transport	10/103	188/18903	7.89e-08	7.58e-07	3e-07	BCL2/PRKACA/ABL1/FYN/SNCA/DRD2/PTK2B/G6PD/CALM1/F2	10
BP	GO:0000086	G2/M transition of mitotic cell cycle	9/103	142/18903	8.14e-08	7.79e-07	3.09e-07	CCND1/APP/CDK4/CDK2/CDK1/CCNA2/ABCB1/AURKA/CALM1	9
BP	GO:0042445	hormone metabolic process	11/103	241/18903	8.19e-08	7.82e-07	3.1e-07	ESR1/HIF1A/PTPN11/ACE/NR3C1/CYP3A4/REN/CTSB/CYP19A1/CYP1A2/CYP2C9	11
BP	GO:1901522	positive regulation of transcription from RNA polymerase II promoter involved in cellular response to chemical stimulus	5/103	21/18903	8.27e-08	7.88e-07	3.12e-07	JUN/HIF1A/EP300/RELA/NFE2L2	5
BP	GO:0008630	intrinsic apoptotic signaling pathway in response to DNA damage	8/103	102/18903	8.48e-08	8.04e-07	3.19e-07	TNF/BCL2/SIRT1/EP300/BCL2L1/MCL1/ABL1/CASP9	8
BP	GO:0046939	nucleotide phosphorylation	8/103	102/18903	8.48e-08	8.04e-07	3.19e-07	GAPDH/STAT3/HIF1A/MTOR/EP300/APP/PPARA/LDHA	8
BP	GO:0043255	regulation of carbohydrate biosynthetic process	8/103	103/18903	9.15e-08	8.63e-07	3.42e-07	AKT1/GSK3B/SIRT1/EP300/PPARA/NR3C1/SNCA/PTK2B	8
BP	GO:0048144	fibroblast proliferation	8/103	103/18903	9.15e-08	8.63e-07	3.42e-07	EGFR/JUN/ESR1/CDK4/ABL1/PDGFRB/CDK1/CCNA2	8
BP	GO:0030323	respiratory tube development	10/103	191/18903	9.16e-08	8.63e-07	3.42e-07	TNF/MAPK3/MAPK1/EP300/KDR/CDC42/FGF2/ACE/PDGFRB/CYP1A2	10
BP	GO:0060078	regulation of postsynaptic membrane potential	9/103	145/18903	9.75e-08	9.16e-07	3.63e-07	AKT1/GSK3B/APP/SNCA/GRIN2B/DRD2/PTK2B/ADRB2/OPRM1	9
BP	GO:0009135	purine nucleoside diphosphate metabolic process	8/103	104/18903	9.87e-08	9.23e-07	3.66e-07	GAPDH/STAT3/HIF1A/MTOR/EP300/APP/PPARA/LDHA	8
BP	GO:0009179	purine ribonucleoside diphosphate metabolic process	8/103	104/18903	9.87e-08	9.23e-07	3.66e-07	GAPDH/STAT3/HIF1A/MTOR/EP300/APP/PPARA/LDHA	8
BP	GO:0050999	regulation of nitric-oxide synthase activity	6/103	42/18903	1.01e-07	9.43e-07	3.74e-07	AKT1/TNF/EGFR/HIF1A/TERT/PTK2B	6
BP	GO:0071868	cellular response to monoamine stimulus	8/103	105/18903	1.06e-07	9.85e-07	3.91e-07	MAPK3/GSK3B/MAPK1/APP/PRKACA/ABL1/SNCA/DRD2	8
BP	GO:0071870	cellular response to catecholamine stimulus	8/103	105/18903	1.06e-07	9.85e-07	3.91e-07	MAPK3/GSK3B/MAPK1/APP/PRKACA/ABL1/SNCA/DRD2	8
BP	GO:0010888	negative regulation of lipid storage	5/103	22/18903	1.07e-07	9.85e-07	3.91e-07	TNF/IL6/PPARG/NFKBIA/PPARA	5
BP	GO:0051000	positive regulation of nitric-oxide synthase activity	5/103	22/18903	1.07e-07	9.85e-07	3.91e-07	AKT1/TNF/HIF1A/TERT/PTK2B	5
BP	GO:0008584	male gonad development	9/103	147/18903	1.1e-07	1.01e-06	4.01e-07	BCL2/ESR1/CCND1/BCL2L1/AR/ACE/PDGFRB/REN/NTRK1	9
BP	GO:0007409	axonogenesis	14/103	438/18903	1.1e-07	1.01e-06	4.02e-07	HSP90AA1/BCL2/HSP90AB1/ERBB2/GSK3B/APP/BRAF/ABL1/ITGB1/PTPN11/FYN/NTRK1/NTRK2/DRD2	14
BP	GO:0046546	development of primary male sexual characteristics	9/103	148/18903	1.16e-07	1.07e-06	4.23e-07	BCL2/ESR1/CCND1/BCL2L1/AR/ACE/PDGFRB/REN/NTRK1	9
BP	GO:0060047	heart contraction	11/103	250/18903	1.19e-07	1.09e-06	4.31e-07	TNF/HSP90AA1/MTOR/MDM2/JAK2/IL2/CDC42/PRKACA/ACE/DRD2/CALM1	11
BP	GO:0055074	calcium ion homeostasis	12/103	309/18903	1.19e-07	1.09e-06	4.33e-07	BCL2/KDR/APP/PTPRC/PRKACA/FGF2/ABL1/SNCA/DRD2/PTK2B/CALM1/F2	12
BP	GO:2001257	regulation of cation channel activity	10/103	197/18903	1.22e-07	1.12e-06	4.43e-07	MMP9/APP/PRKACA/ITGB1/CTSS/DRD2/PTK2B/ADRB2/OPRM1/CALM1	10
BP	GO:0032963	collagen metabolic process	8/103	107/18903	1.23e-07	1.12e-06	4.45e-07	IL6/HIF1A/MMP9/ITGB1/PDGFRB/CTSB/CTSS/F2	8
BP	GO:0050863	regulation of T cell activation	13/103	376/18903	1.32e-07	1.19e-06	4.73e-07	AKT1/IL6/SRC/CASP3/ERBB2/JAK2/IL2/PTPRC/BRAF/ABL1/PTPN11/FYN/LGALS3	13
BP	GO:0006090	pyruvate metabolic process	8/103	108/18903	1.32e-07	1.19e-06	4.73e-07	GAPDH/STAT3/HIF1A/MTOR/EP300/APP/PPARA/LDHA	8
BP	GO:0007631	feeding behavior	8/103	108/18903	1.32e-07	1.19e-06	4.73e-07	STAT3/APP/ACE/FYN/REN/NTRK2/DRD2/OPRM1	8
BP	GO:0071867	response to monoamine	8/103	108/18903	1.32e-07	1.19e-06	4.73e-07	MAPK3/GSK3B/MAPK1/APP/PRKACA/ABL1/SNCA/DRD2	8
BP	GO:0071869	response to catecholamine	8/103	108/18903	1.32e-07	1.19e-06	4.73e-07	MAPK3/GSK3B/MAPK1/APP/PRKACA/ABL1/SNCA/DRD2	8
BP	GO:0010828	positive regulation of glucose transmembrane transport	6/103	44/18903	1.35e-07	1.21e-06	4.79e-07	AKT1/MAPK14/BRAF/PTPN11/NFE2L2/TERT	6
BP	GO:0021762	substantia nigra development	6/103	44/18903	1.35e-07	1.21e-06	4.79e-07	CDC42/FGF2/HSPA5/MAOB/G6PD/CALM1	6
BP	GO:0071260	cellular response to mechanical stimulus	7/103	73/18903	1.41e-07	1.26e-06	4.99e-07	MAPK3/PTGS2/TLR4/FGF2/CASP8/MAPK8/CASP1	7
BP	GO:0042116	macrophage activation	8/103	109/18903	1.42e-07	1.27e-06	5.04e-07	TNF/IL6/JUN/TLR4/JAK2/APP/PTPRC/SNCA	8
BP	GO:0043122	regulation of I-kappaB kinase/NF-kappaB signaling	11/103	255/18903	1.45e-07	1.29e-06	5.12e-07	GAPDH/TNF/ESR1/TLR4/SIRT1/RELA/HDAC1/CASP8/ABL1/CASP1/FYN	11
BP	GO:0001763	morphogenesis of a branching structure	10/103	203/18903	1.62e-07	1.44e-06	5.71e-07	TNF/SRC/BCL2/ESR1/KDR/GRB2/FGF2/ABL1/AR/DRD2	10
BP	GO:0032611	interleukin-1 beta production	8/103	111/18903	1.64e-07	1.45e-06	5.75e-07	TNF/IL6/STAT3/TLR4/JAK2/APP/CASP8/CASP1	8
BP	GO:0032651	regulation of interleukin-1 beta production	8/103	111/18903	1.64e-07	1.45e-06	5.75e-07	TNF/IL6/STAT3/TLR4/JAK2/APP/CASP8/CASP1	8
BP	GO:1901987	regulation of cell cycle phase transition	14/103	453/18903	1.66e-07	1.47e-06	5.81e-07	AKT1/EGFR/BCL2/CCND1/MDM2/APP/MAPK14/EZH2/CDK4/CDK2/PTPN11/CDK1/TERT/AURKA	14
BP	GO:1901888	regulation of cell junction assembly	10/103	204/18903	1.7e-07	1.49e-06	5.92e-07	TNF/SRC/KDR/APP/PRKACA/ABL1/ACE/NTRK1/SNCA/NTRK2	10
BP	GO:0046323	glucose import	7/103	75/18903	1.7e-07	1.49e-06	5.92e-07	AKT1/TNF/MAPK14/PTPN11/ACE/NFE2L2/TERT	7
BP	GO:0043369	CD4-positive or CD8-positive, alpha-beta T cell lineage commitment	5/103	24/18903	1.7e-07	1.5e-06	5.93e-07	IL6/STAT3/BCL2/MTOR/BRAF	5
BP	GO:0003012	muscle system process	14/103	455/18903	1.75e-07	1.53e-06	6.08e-07	TNF/HSP90AA1/PPARG/PTGS2/MTOR/PARP1/PRKACA/EZH2/PPARA/PRKCA/DRD2/ADRB2/G6PD/CALM1	14
BP	GO:2001239	regulation of extrinsic apoptotic signaling pathway in absence of ligand	6/103	46/18903	1.77e-07	1.55e-06	6.14e-07	AKT1/TNF/BCL2/BCL2L1/MCL1/TERT	6
BP	GO:0034976	response to endoplasmic reticulum stress	11/103	261/18903	1.83e-07	1.6e-06	6.33e-07	BCL2/JUN/CCND1/GSK3B/SIRT1/EP300/BCL2L1/ABL1/HSPA5/NFE2L2/VCP	11
BP	GO:0071674	mononuclear cell migration	10/103	206/18903	1.86e-07	1.61e-06	6.4e-07	AKT1/TNF/IL6/MAPK3/MAPK1/APP/CDC42/ABL1/LGALS3/PTK2B	10
BP	GO:1904659	glucose transmembrane transport	8/103	113/18903	1.88e-07	1.63e-06	6.48e-07	AKT1/TNF/MAPK14/BRAF/PTPN11/ACE/NFE2L2/TERT	8
BP	GO:0198738	cell-cell signaling by wnt	14/103	458/18903	1.9e-07	1.64e-06	6.51e-07	SRC/EGFR/CCND1/GSK3B/APP/CDC42/MAPK14/FGF2/HDAC1/ABL1/TERT/DRD2/VCP/OPRM1	14
BP	GO:0044839	cell cycle G2/M phase transition	9/103	157/18903	1.93e-07	1.66e-06	6.6e-07	CCND1/APP/CDK4/CDK2/CDK1/CCNA2/ABCB1/AURKA/CALM1	9
BP	GO:0050878	regulation of body fluid levels	13/103	390/18903	2.01e-07	1.73e-06	6.86e-07	IL6/SRC/HIF1A/CCND1/TLR4/JAK2/MAPK14/PRKACA/PRKCA/NFE2L2/DRD2/XDH/F2	13
BP	GO:0009185	ribonucleoside diphosphate metabolic process	8/103	114/18903	2.02e-07	1.73e-06	6.86e-07	GAPDH/STAT3/HIF1A/MTOR/EP300/APP/PPARA/LDHA	8
BP	GO:0006110	regulation of glycolytic process	6/103	47/18903	2.02e-07	1.73e-06	6.86e-07	STAT3/HIF1A/MTOR/EP300/APP/PPARA	6
BP	GO:0008542	visual learning	6/103	47/18903	2.02e-07	1.73e-06	6.86e-07	HIF1A/APP/BRAF/ITGB1/HMGCR/DRD2	6
BP	GO:0070849	response to epidermal growth factor	6/103	47/18903	2.02e-07	1.73e-06	6.86e-07	AKT1/EGFR/MAPK3/ERBB2/MAPK1/PTPN11	6
BP	GO:0019722	calcium-mediated signaling	10/103	208/18903	2.03e-07	1.73e-06	6.87e-07	TNF/MTOR/GSK3B/KDR/PTPRC/PRKACA/AGTR1/GRIN2B/PTK2B/CALM1	10
BP	GO:2000209	regulation of anoikis	5/103	25/18903	2.12e-07	1.81e-06	7.16e-07	SRC/BCL2/MCL1/ITGB1/NTRK2	5
BP	GO:0031648	protein destabilization	6/103	48/18903	2.3e-07	1.95e-06	7.74e-07	SRC/SIRT1/EP300/MDM2/CREBBP/SNCA	6
BP	GO:0008645	hexose transmembrane transport	8/103	116/18903	2.31e-07	1.95e-06	7.74e-07	AKT1/TNF/MAPK14/BRAF/PTPN11/ACE/NFE2L2/TERT	8
BP	GO:0051702	biological process involved in interaction with symbiont	8/103	116/18903	2.31e-07	1.95e-06	7.74e-07	GAPDH/JUN/EP300/JAK2/CDC42/HDAC1/FASN/F2	8
BP	GO:0042594	response to starvation	10/103	211/18903	2.32e-07	1.95e-06	7.75e-07	BCL2/MAPK3/MTOR/MAPK1/SIRT1/PPARA/MAPK8/HSPA5/NFE2L2/COMT	10
BP	GO:0060541	respiratory system development	10/103	211/18903	2.32e-07	1.95e-06	7.75e-07	TNF/MAPK3/MAPK1/EP300/KDR/CDC42/FGF2/ACE/PDGFRB/CYP1A2	10
BP	GO:0006913	nucleocytoplasmic transport	12/103	329/18903	2.35e-07	1.97e-06	7.8e-07	AKT1/STAT3/HSP90AA1/HSP90AB1/PTGS2/GSK3B/JAK2/NFKBIA/MAPK14/PRKACA/PTPN11/CDK1	12
BP	GO:0051169	nuclear transport	12/103	329/18903	2.35e-07	1.97e-06	7.8e-07	AKT1/STAT3/HSP90AA1/HSP90AB1/PTGS2/GSK3B/JAK2/NFKBIA/MAPK14/PRKACA/PTPN11/CDK1	12
BP	GO:0002253	activation of immune response	13/103	397/18903	2.46e-07	2.06e-06	8.18e-07	SRC/HSP90AA1/BCL2/TLR4/MAPK1/EP300/RELA/PTPRC/BRAF/CREBBP/ABL1/FYN/LGALS3	13
BP	GO:0002064	epithelial cell development	10/103	213/18903	2.53e-07	2.12e-06	8.39e-07	AKT1/TNF/SRC/ESR1/HIF1A/GSK3B/KDR/AR/FASN/NTRK1	10
BP	GO:0035307	positive regulation of protein dephosphorylation	6/103	49/18903	2.61e-07	2.18e-06	8.64e-07	HSP90AB1/MTOR/JAK2/PTPRC/PDGFRB/CALM1	6
BP	GO:0045637	regulation of myeloid cell differentiation	10/103	214/18903	2.64e-07	2.2e-06	8.72e-07	TNF/STAT3/HIF1A/MTOR/TLR4/NFKBIA/MAPK14/CASP8/PRKCA/PTK2B	10
BP	GO:0060020	Bergmann glial cell differentiation	4/103	11/18903	2.66e-07	2.21e-06	8.77e-07	MAPK3/MAPK1/ABL1/PTPN11	4
BP	GO:0015749	monosaccharide transmembrane transport	8/103	119/18903	2.81e-07	2.33e-06	9.24e-07	AKT1/TNF/MAPK14/BRAF/PTPN11/ACE/NFE2L2/TERT	8
BP	GO:0060562	epithelial tube morphogenesis	12/103	335/18903	2.85e-07	2.35e-06	9.34e-07	TNF/SRC/BCL2/CASP3/ESR1/HIF1A/KDR/PRKACA/FGF2/ABL1/AR/NR3C1	12
BP	GO:0010833	telomere maintenance via telomere lengthening	7/103	81/18903	2.9e-07	2.39e-06	9.49e-07	SRC/HSP90AA1/MAPK3/HSP90AB1/MAPK1/PARP1/TERT	7
BP	GO:0051604	protein maturation	12/103	336/18903	2.94e-07	2.42e-06	9.59e-07	SRC/CASP3/EP300/PARP1/PRKACA/CASP8/CREBBP/CASP9/ACE/CASP1/REN/CTSS	12
BP	GO:0006606	protein import into nucleus	9/103	165/18903	2.94e-07	2.42e-06	9.59e-07	AKT1/STAT3/HSP90AA1/HSP90AB1/PTGS2/JAK2/NFKBIA/MAPK14/CDK1	9
BP	GO:0019693	ribose phosphate metabolic process	14/103	475/18903	2.95e-07	2.42e-06	9.6e-07	GAPDH/STAT3/HIF1A/MTOR/EP300/PARP1/APP/PPARA/HMGCR/SNCA/VCP/XDH/LDHA/G6PD	14
BP	GO:0046034	ATP metabolic process	10/103	217/18903	3.01e-07	2.46e-06	9.76e-07	GAPDH/STAT3/HIF1A/MTOR/EP300/PARP1/APP/PPARA/VCP/LDHA	10
BP	GO:0001894	tissue homeostasis	11/103	275/18903	3.09e-07	2.52e-06	9.98e-07	IL6/SRC/BCL2/PTGS2/TLR4/KDR/ITGB1/PTPN11/PRKCA/PTK2B/ADRB2	11
BP	GO:1903039	positive regulation of leukocyte cell-cell adhesion	11/103	275/18903	3.09e-07	2.52e-06	9.98e-07	AKT1/TNF/IL6/SRC/JAK2/IL2/RELA/PTPRC/ABL1/PTPN11/FYN	11
BP	GO:0045786	negative regulation of cell cycle	13/103	405/18903	3.09e-07	2.52e-06	9.98e-07	TNF/BCL2/CASP3/PTGS2/CCND1/SIRT1/MDM2/MAPK14/EZH2/ABL1/CDK2/PTPN11/CDK1	13
BP	GO:2000736	regulation of stem cell differentiation	7/103	82/18903	3.16e-07	2.56e-06	1.02e-06	STAT3/GSK3B/FGF2/EZH2/HDAC1/ABL1/NFE2L2	7
BP	GO:0030307	positive regulation of cell growth	9/103	167/18903	3.26e-07	2.64e-06	1.05e-06	AKT1/EGFR/BCL2/ERBB2/MTOR/IL2/CDC42/PTK2B/F2	9
BP	GO:0070665	positive regulation of leukocyte proliferation	9/103	167/18903	3.26e-07	2.64e-06	1.05e-06	IL6/BCL2/MAPK3/TLR4/MAPK1/BCL2L1/JAK2/IL2/PTPRC	9
BP	GO:0045058	T cell selection	6/103	51/18903	3.34e-07	2.69e-06	1.07e-06	IL6/STAT3/BCL2/MTOR/PTPRC/BRAF	6
BP	GO:0002768	immune response-regulating cell surface receptor signaling pathway	12/103	341/18903	3.44e-07	2.77e-06	1.1e-06	SRC/BCL2/MAPK1/EP300/RELA/PTPRC/BRAF/CREBBP/ABL1/MAPK8/FYN/LGALS3	12
BP	GO:0042692	muscle cell differentiation	13/103	409/18903	3.46e-07	2.78e-06	1.1e-06	AKT1/BCL2/CASP3/MTOR/SIRT1/MDM2/MAPK14/EZH2/PPARA/ITGB1/PDGFRB/CDK1/G6PD	13
BP	GO:0007568	aging	9/103	169/18903	3.6e-07	2.89e-06	1.14e-06	PTGS2/GRB2/FGF2/CASP9/ACE/PDGFRB/NFE2L2/MPO/NTRK1	9
BP	GO:0051170	import into nucleus	9/103	169/18903	3.6e-07	2.89e-06	1.14e-06	AKT1/STAT3/HSP90AA1/HSP90AB1/PTGS2/JAK2/NFKBIA/MAPK14/CDK1	9
BP	GO:0022612	gland morphogenesis	8/103	123/18903	3.62e-07	2.89e-06	1.15e-06	TNF/IL6/SRC/EGFR/BCL2/ESR1/AR/NR3C1	8
BP	GO:0071675	regulation of mononuclear cell migration	8/103	123/18903	3.62e-07	2.89e-06	1.15e-06	AKT1/TNF/MAPK3/MAPK1/APP/ABL1/LGALS3/PTK2B	8
BP	GO:0044843	cell cycle G1/S phase transition	11/103	280/18903	3.7e-07	2.94e-06	1.17e-06	AKT1/EGFR/BCL2/CCND1/MDM2/EZH2/CDK4/CDK2/ITGB1/CCNA2/TERT	11
BP	GO:2000058	regulation of ubiquitin-dependent protein catabolic process	9/103	170/18903	3.79e-07	3.01e-06	1.19e-06	AKT1/HSP90AB1/GSK3B/MDM2/CDK2/NFE2L2/AURKA/PTK2B/VCP	9
BP	GO:0032412	regulation of ion transmembrane transporter activity	11/103	281/18903	3.83e-07	3.04e-06	1.2e-06	MMP9/APP/PRKACA/ITGB1/ABCB1/CTSS/DRD2/PTK2B/ADRB2/OPRM1/CALM1	11
BP	GO:1900017	positive regulation of cytokine production involved in inflammatory response	5/103	28/18903	3.87e-07	3.07e-06	1.22e-06	TNF/IL6/STAT3/HIF1A/TLR4	5
BP	GO:0046661	male sex differentiation	9/103	171/18903	3.98e-07	3.14e-06	1.25e-06	BCL2/ESR1/CCND1/BCL2L1/AR/ACE/PDGFRB/REN/NTRK1	9
BP	GO:0008306	associative learning	7/103	85/18903	4.04e-07	3.19e-06	1.26e-06	HIF1A/APP/BRAF/ABL1/ITGB1/HMGCR/DRD2	7
BP	GO:0007259	receptor signaling pathway via JAK-STAT	9/103	172/18903	4.18e-07	3.29e-06	1.31e-06	TNF/IL6/STAT3/JAK2/IL2/PTPRC/FYN/PTK2B/F2	9
BP	GO:0007632	visual behavior	6/103	53/18903	4.21e-07	3.31e-06	1.31e-06	HIF1A/APP/BRAF/ITGB1/HMGCR/DRD2	6
BP	GO:0006874	cellular calcium ion homeostasis	11/103	284/18903	4.26e-07	3.34e-06	1.32e-06	BCL2/APP/PTPRC/PRKACA/FGF2/ABL1/SNCA/DRD2/PTK2B/CALM1/F2	11
BP	GO:1903050	regulation of proteolysis involved in protein catabolic process	10/103	227/18903	4.55e-07	3.56e-06	1.41e-06	AKT1/HSP90AB1/GSK3B/MDM2/PRKACA/CDK2/NFE2L2/AURKA/PTK2B/VCP	10
BP	GO:0046631	alpha-beta T cell activation	9/103	174/18903	4.61e-07	3.6e-06	1.43e-06	IL6/STAT3/BCL2/MTOR/JAK2/IL2/PTPRC/BRAF/ABL1	9
BP	GO:0097421	liver regeneration	5/103	29/18903	4.66e-07	3.63e-06	1.44e-06	TNF/IL6/CCND1/EZH2/AURKA	5
BP	GO:0010883	regulation of lipid storage	6/103	54/18903	4.72e-07	3.67e-06	1.46e-06	TNF/IL6/PPARG/SIRT1/NFKBIA/PPARA	6
BP	GO:0014910	regulation of smooth muscle cell migration	7/103	87/18903	4.74e-07	3.68e-06	1.46e-06	SRC/BCL2/TLR4/ACE/PDGFRB/NFE2L2/TERT	7
BP	GO:0048145	regulation of fibroblast proliferation	7/103	87/18903	4.74e-07	3.68e-06	1.46e-06	EGFR/JUN/ESR1/CDK4/ABL1/PDGFRB/CCNA2	7
BP	GO:0051048	negative regulation of secretion	9/103	175/18903	4.84e-07	3.74e-06	1.48e-06	TNF/BRAF/PTPN11/ACE/HMGCR/SNCA/DRD2/MAOB/OPRM1	9
BP	GO:0019318	hexose metabolic process	10/103	229/18903	4.94e-07	3.81e-06	1.51e-06	GAPDH/AKT1/TNF/SRC/SIRT1/EP300/MAPK14/PPARA/NR3C1/G6PD	10
BP	GO:0007265	Ras protein signal transduction	12/103	353/18903	4.97e-07	3.83e-06	1.52e-06	SRC/JUN/GRB2/CDC42/FGF2/ABL1/CDK2/ITGB1/PDGFRB/CCNA2/NTRK1/AGTR1	12
BP	GO:1901990	regulation of mitotic cell cycle phase transition	12/103	354/18903	5.12e-07	3.94e-06	1.56e-06	AKT1/EGFR/BCL2/CCND1/MDM2/APP/EZH2/CDK4/CDK2/CDK1/TERT/AURKA	12
BP	GO:0043525	positive regulation of neuron apoptotic process	6/103	55/18903	5.28e-07	4.05e-06	1.61e-06	TNF/CASP3/MCL1/ABL1/CASP9/NR3C1	6
BP	GO:0030003	cellular cation homeostasis	14/103	499/18903	5.34e-07	4.09e-06	1.62e-06	BCL2/HIF1A/MAPK3/MAPK1/APP/PTPRC/PRKACA/FGF2/ABL1/SNCA/DRD2/PTK2B/CALM1/F2	14
BP	GO:0002685	regulation of leukocyte migration	10/103	231/18903	5.34e-07	4.09e-06	1.62e-06	AKT1/TNF/IL6/MAPK3/MAPK1/APP/ABL1/LGALS3/CYP19A1/PTK2B	10
BP	GO:0072507	divalent inorganic cation homeostasis	12/103	356/18903	5.44e-07	4.15e-06	1.65e-06	BCL2/KDR/APP/PTPRC/PRKACA/FGF2/ABL1/SNCA/DRD2/PTK2B/CALM1/F2	12
BP	GO:0032612	interleukin-1 production	8/103	130/18903	5.54e-07	4.2e-06	1.67e-06	TNF/IL6/STAT3/TLR4/JAK2/APP/CASP8/CASP1	8
BP	GO:0032652	regulation of interleukin-1 production	8/103	130/18903	5.54e-07	4.2e-06	1.67e-06	TNF/IL6/STAT3/TLR4/JAK2/APP/CASP8/CASP1	8
BP	GO:0034644	cellular response to UV	7/103	89/18903	5.54e-07	4.2e-06	1.67e-06	PTGS2/MMP9/SIRT1/EP300/PARP1/CREBBP/CASP9	7
BP	GO:0048864	stem cell development	7/103	89/18903	5.54e-07	4.2e-06	1.67e-06	BCL2/HIF1A/MAPK3/MAPK1/PTPRC/CDC42/FGF2	7
BP	GO:0002360	T cell lineage commitment	5/103	30/18903	5.57e-07	4.2e-06	1.67e-06	IL6/STAT3/BCL2/MTOR/BRAF	5
BP	GO:1903203	regulation of oxidative stress-induced neuron death	5/103	30/18903	5.57e-07	4.2e-06	1.67e-06	TNF/HIF1A/TLR4/PARP1/MCL1	5
BP	GO:0015850	organic hydroxy compound transport	11/103	292/18903	5.6e-07	4.22e-06	1.67e-06	PPARG/SIRT1/NFKBIA/PTPN11/REN/AGTR1/SNCA/DRD2/MAOB/CYP19A1/RXRA	11
BP	GO:0051146	striated muscle cell differentiation	11/103	293/18903	5.8e-07	4.36e-06	1.73e-06	AKT1/BCL2/CASP3/MTOR/MAPK14/EZH2/PPARA/ITGB1/PDGFRB/CDK1/G6PD	11
BP	GO:0043470	regulation of carbohydrate catabolic process	6/103	56/18903	5.88e-07	4.42e-06	1.75e-06	STAT3/HIF1A/MTOR/EP300/APP/PPARA	6
BP	GO:0060191	regulation of lipase activity	7/103	90/18903	5.99e-07	4.49e-06	1.78e-06	EGFR/ESR1/FGF2/ABL1/PDGFRB/AGTR1/SNCA	7
BP	GO:0046883	regulation of hormone secretion	10/103	234/18903	6.01e-07	4.5e-06	1.78e-06	TNF/IL6/HIF1A/PPARG/JAK2/PTPN11/REN/AGTR1/DRD2/CYP19A1	10
BP	GO:0009132	nucleoside diphosphate metabolic process	8/103	132/18903	6.23e-07	4.64e-06	1.84e-06	GAPDH/STAT3/HIF1A/MTOR/EP300/APP/PPARA/LDHA	8
BP	GO:0034219	carbohydrate transmembrane transport	8/103	132/18903	6.23e-07	4.64e-06	1.84e-06	AKT1/TNF/MAPK14/BRAF/PTPN11/ACE/NFE2L2/TERT	8
BP	GO:0050808	synapse organization	13/103	432/18903	6.42e-07	4.78e-06	1.89e-06	TNF/ERBB2/APP/CDC42/MAPK14/ABL1/FYN/NTRK1/SNCA/GRIN2B/NTRK2/DRD2/VCP	13
BP	GO:0010332	response to gamma radiation	6/103	57/18903	6.55e-07	4.84e-06	1.92e-06	BCL2/MDM2/BCL2L1/PARP1/PTPRC/HSPA5	6
BP	GO:0035196	miRNA processing	6/103	57/18903	6.55e-07	4.84e-06	1.92e-06	TNF/IL6/EGFR/STAT3/ESR1/TERT	6
BP	GO:0043388	positive regulation of DNA binding	6/103	57/18903	6.55e-07	4.84e-06	1.92e-06	PPARG/MMP9/EP300/JAK2/PARP1/CALM1	6
BP	GO:0001101	response to acid chemical	8/103	133/18903	6.59e-07	4.87e-06	1.93e-06	TNF/EGFR/CASP3/MTOR/BCL2L1/FYN/NTRK1/NTRK2	8
BP	GO:0032102	negative regulation of response to external stimulus	13/103	436/18903	7.12e-07	5.25e-06	2.08e-06	TNF/SRC/PPARG/IL2/PARP1/PTPRC/MAPK14/FGF2/PPARA/FYN/DRD2/CYP19A1/F2	13
BP	GO:0048008	platelet-derived growth factor receptor signaling pathway	6/103	58/18903	7.27e-07	5.34e-06	2.12e-06	SRC/JAK2/ABL1/PTPN11/PDGFRB/SNCA	6
BP	GO:0048010	vascular endothelial growth factor receptor signaling pathway	6/103	58/18903	7.27e-07	5.34e-06	2.12e-06	SRC/HIF1A/KDR/MAPK14/FYN/PTK2B	6
BP	GO:0051403	stress-activated MAPK cascade	10/103	239/18903	7.3e-07	5.35e-06	2.12e-06	TNF/EGFR/MAPK3/TLR4/MAPK1/APP/MAPK14/MAPK8/PTK2B/XDH	10
BP	GO:0032770	positive regulation of monooxygenase activity	5/103	32/18903	7.8e-07	5.69e-06	2.26e-06	AKT1/TNF/HIF1A/TERT/PTK2B	5
BP	GO:0043552	positive regulation of phosphatidylinositol 3-kinase activity	5/103	32/18903	7.8e-07	5.69e-06	2.26e-06	SRC/CDC42/FGF2/PDGFRB/PTK2B	5
BP	GO:1990776	response to angiotensin	5/103	32/18903	7.8e-07	5.69e-06	2.26e-06	SRC/PTGS2/RELA/NFE2L2/AGTR1	5
BP	GO:0048738	cardiac muscle tissue development	10/103	241/18903	7.87e-07	5.73e-06	2.27e-06	MTOR/CDC42/MAPK14/FGF2/ABL1/PPARA/ITGB1/PDGFRB/CDK1/G6PD	10
BP	GO:0070141	response to UV-A	4/103	14/18903	7.98e-07	5.8e-06	2.3e-06	AKT1/EGFR/MMP9/CCND1	4
BP	GO:0042306	regulation of protein import into nucleus	6/103	59/18903	8.06e-07	5.84e-06	2.32e-06	HSP90AA1/HSP90AB1/PTGS2/JAK2/MAPK14/CDK1	6
BP	GO:0034767	positive regulation of ion transmembrane transport	9/103	186/18903	8.07e-07	5.84e-06	2.32e-06	ABL1/ITGB1/ABCB1/SNCA/CTSS/ADRB2/G6PD/CALM1/F2	9
BP	GO:0009205	purine ribonucleoside triphosphate metabolic process	10/103	242/18903	8.17e-07	5.91e-06	2.34e-06	GAPDH/STAT3/HIF1A/MTOR/EP300/PARP1/APP/PPARA/VCP/LDHA	10
BP	GO:0032944	regulation of mononuclear cell proliferation	10/103	243/18903	8.49e-07	6.12e-06	2.43e-06	IL6/BCL2/CASP3/ERBB2/TLR4/BCL2L1/JAK2/IL2/PTPRC/LGALS3	10
BP	GO:0046651	lymphocyte proliferation	11/103	305/18903	8.61e-07	6.2e-06	2.46e-06	IL6/BCL2/CASP3/ERBB2/TLR4/JAK2/IL2/PTPRC/ABL1/FYN/LGALS3	11
BP	GO:0014909	smooth muscle cell migration	7/103	95/18903	8.66e-07	6.22e-06	2.47e-06	SRC/BCL2/TLR4/ACE/PDGFRB/NFE2L2/TERT	7
BP	GO:0045444	fat cell differentiation	10/103	244/18903	8.81e-07	6.32e-06	2.51e-06	AKT1/TNF/IL6/PPARG/PTGS2/CCND1/SIRT1/EP300/MAPK14/ADRB2	10
BP	GO:0061138	morphogenesis of a branching epithelium	9/103	188/18903	8.83e-07	6.32e-06	2.51e-06	TNF/SRC/BCL2/ESR1/KDR/GRB2/FGF2/ABL1/AR	9
BP	GO:0051346	negative regulation of hydrolase activity	12/103	373/18903	8.9e-07	6.36e-06	2.52e-06	GAPDH/AKT1/TNF/SRC/PTGS2/MMP9/GSK3B/APP/ABL1/CTSB/SNCA/LGALS3	12
BP	GO:2000351	regulation of endothelial cell apoptotic process	6/103	60/18903	8.91e-07	6.36e-06	2.52e-06	TNF/KDR/BRAF/ABL1/NFE2L2/TERT	6
BP	GO:0036475	neuron death in response to oxidative stress	5/103	33/18903	9.16e-07	6.52e-06	2.59e-06	TNF/HIF1A/TLR4/PARP1/MCL1	5
BP	GO:0007565	female pregnancy	9/103	189/18903	9.23e-07	6.56e-06	2.6e-06	AKT1/BCL2/ESR1/PTGS2/MMP9/PARP1/AR/ACE/CTSB	9
BP	GO:0003073	regulation of systemic arterial blood pressure	7/103	96/18903	9.3e-07	6.6e-06	2.62e-06	TNF/AR/ACE/REN/AGTR1/DRD2/ADRB2	7
BP	GO:0009150	purine ribonucleotide metabolic process	13/103	447/18903	9.41e-07	6.67e-06	2.65e-06	GAPDH/STAT3/HIF1A/MTOR/EP300/PARP1/APP/PPARA/HMGCR/SNCA/VCP/XDH/LDHA	13
BP	GO:0007162	negative regulation of cell adhesion	11/103	308/18903	9.47e-07	6.7e-06	2.66e-06	AKT1/SRC/CASP3/ERBB2/JAK2/IL2/PTPRC/ABL1/PPARA/PTPN11/LGALS3	11
BP	GO:0031098	stress-activated protein kinase signaling cascade	10/103	246/18903	9.49e-07	6.7e-06	2.66e-06	TNF/EGFR/MAPK3/TLR4/MAPK1/APP/MAPK14/MAPK8/PTK2B/XDH	10
BP	GO:0050777	negative regulation of immune response	9/103	190/18903	9.64e-07	6.8e-06	2.7e-06	SRC/PPARG/IL2/PARP1/PTPRC/MAPK14/FYN/LGALS3/DRD2	9
BP	GO:0034341	response to interferon-gamma	8/103	140/18903	9.74e-07	6.86e-06	2.72e-06	GAPDH/TNF/PPARG/TLR4/JAK2/CDC42/CASP1/SNCA	8
BP	GO:0060135	maternal process involved in female pregnancy	6/103	61/18903	9.84e-07	6.89e-06	2.73e-06	AKT1/ESR1/PTGS2/PARP1/AR/CTSB	6
BP	GO:0070918	small regulatory ncRNA processing	6/103	61/18903	9.84e-07	6.89e-06	2.73e-06	TNF/IL6/EGFR/STAT3/ESR1/TERT	6
BP	GO:0009144	purine nucleoside triphosphate metabolic process	10/103	247/18903	9.84e-07	6.89e-06	2.73e-06	GAPDH/STAT3/HIF1A/MTOR/EP300/PARP1/APP/PPARA/VCP/LDHA	10
BP	GO:0005996	monosaccharide metabolic process	10/103	248/18903	1.02e-06	7.14e-06	2.83e-06	GAPDH/AKT1/TNF/SRC/SIRT1/EP300/MAPK14/PPARA/NR3C1/G6PD	10
BP	GO:0032434	regulation of proteasomal ubiquitin-dependent protein catabolic process	8/103	141/18903	1.03e-06	7.16e-06	2.84e-06	AKT1/HSP90AB1/GSK3B/MDM2/CDK2/NFE2L2/AURKA/VCP	8
BP	GO:0070555	response to interleukin-1	8/103	141/18903	1.03e-06	7.16e-06	2.84e-06	IL6/SRC/HIF1A/MAPK3/RELA/APP/PRKCA/SNCA	8
BP	GO:0009199	ribonucleoside triphosphate metabolic process	10/103	249/18903	1.06e-06	7.37e-06	2.92e-06	GAPDH/STAT3/HIF1A/MTOR/EP300/PARP1/APP/PPARA/VCP/LDHA	10
BP	GO:0002429	immune response-activating cell surface receptor signaling pathway	11/103	312/18903	1.07e-06	7.45e-06	2.95e-06	SRC/BCL2/MAPK1/EP300/RELA/PTPRC/BRAF/CREBBP/ABL1/FYN/LGALS3	11
BP	GO:0002757	immune response-activating signal transduction	11/103	312/18903	1.07e-06	7.45e-06	2.95e-06	SRC/BCL2/MAPK1/EP300/RELA/PTPRC/BRAF/CREBBP/ABL1/FYN/LGALS3	11
BP	GO:0038061	NIK/NF-kappaB signaling	8/103	142/18903	1.08e-06	7.5e-06	2.98e-06	AKT1/TNF/EGFR/TLR4/EP300/RELA/NFKBIA/APP	8
BP	GO:0000082	G1/S transition of mitotic cell cycle	10/103	250/18903	1.1e-06	7.56e-06	3e-06	AKT1/EGFR/BCL2/CCND1/MDM2/EZH2/CDK4/CDK2/ITGB1/TERT	10
BP	GO:0016485	protein processing	10/103	250/18903	1.1e-06	7.56e-06	3e-06	SRC/CASP3/PARP1/PRKACA/CASP8/CASP9/ACE/CASP1/REN/CTSS	10
BP	GO:0071695	anatomical structure maturation	10/103	250/18903	1.1e-06	7.56e-06	3e-06	BCL2/HIF1A/PPARG/KDR/APP/PRKACA/REN/AURKA/PTK2B/G6PD	10
BP	GO:0060485	mesenchyme development	11/103	313/18903	1.11e-06	7.62e-06	3.02e-06	IL6/BCL2/HIF1A/MAPK3/MTOR/GSK3B/MAPK1/MDM2/CDC42/EZH2/PDGFRB	11
BP	GO:0019932	second-messenger-mediated signaling	11/103	314/18903	1.14e-06	7.85e-06	3.11e-06	TNF/EGFR/MTOR/GSK3B/KDR/PTPRC/PRKACA/AGTR1/GRIN2B/PTK2B/CALM1	11
BP	GO:0061136	regulation of proteasomal protein catabolic process	9/103	194/18903	1.15e-06	7.86e-06	3.12e-06	AKT1/HSP90AB1/GSK3B/MDM2/PRKACA/CDK2/NFE2L2/AURKA/VCP	9
BP	GO:0030900	forebrain development	12/103	383/18903	1.17e-06	8.03e-06	3.18e-06	SRC/EGFR/CASP3/HIF1A/GSK3B/APP/FGF2/EZH2/HDAC1/FYN/NTRK2/DRD2	12
BP	GO:0016055	Wnt signaling pathway	13/103	456/18903	1.18e-06	8.03e-06	3.18e-06	SRC/EGFR/CCND1/GSK3B/APP/CDC42/MAPK14/FGF2/HDAC1/ABL1/TERT/DRD2/VCP	13
BP	GO:0001776	leukocyte homeostasis	7/103	100/18903	1.23e-06	8.36e-06	3.32e-06	AKT1/IL6/BCL2/CASP3/HIF1A/IL2/ABL1	7
BP	GO:2000352	negative regulation of endothelial cell apoptotic process	5/103	35/18903	1.24e-06	8.45e-06	3.35e-06	KDR/BRAF/ABL1/NFE2L2/TERT	5
BP	GO:0002218	activation of innate immune response	6/103	64/18903	1.31e-06	8.91e-06	3.53e-06	SRC/HSP90AA1/TLR4/EP300/CREBBP/FYN	6
BP	GO:0090257	regulation of muscle system process	10/103	256/18903	1.36e-06	9.23e-06	3.66e-06	HSP90AA1/PPARG/PTGS2/PARP1/PRKACA/PPARA/PRKCA/ADRB2/G6PD/CALM1	10
BP	GO:0017015	regulation of transforming growth factor beta receptor signaling pathway	8/103	147/18903	1.41e-06	9.51e-06	3.77e-06	PPARG/HSP90AB1/SIRT1/EP300/HDAC1/CREBBP/PPARA/HSPA5	8
BP	GO:0014706	striated muscle tissue development	10/103	257/18903	1.41e-06	9.51e-06	3.77e-06	MTOR/CDC42/MAPK14/FGF2/ABL1/PPARA/ITGB1/PDGFRB/CDK1/G6PD	10
BP	GO:0050708	regulation of protein secretion	10/103	257/18903	1.41e-06	9.51e-06	3.77e-06	TNF/IL6/HIF1A/PPARG/TLR4/JAK2/PTPN11/HMGCR/DRD2/OPRM1	10
BP	GO:1903580	positive regulation of ATP metabolic process	5/103	36/18903	1.44e-06	9.66e-06	3.83e-06	HIF1A/MTOR/APP/PPARA/VCP	5
BP	GO:0040014	regulation of multicellular organism growth	6/103	65/18903	1.44e-06	9.66e-06	3.83e-06	STAT3/BCL2/APP/CDK4/DRD2/ADRB2	6
BP	GO:0050435	amyloid-beta metabolic process	6/103	65/18903	1.44e-06	9.66e-06	3.83e-06	TNF/CASP3/RELA/ACE/REN/NTRK2	6
BP	GO:0022409	positive regulation of cell-cell adhesion	11/103	322/18903	1.46e-06	9.8e-06	3.89e-06	AKT1/TNF/IL6/SRC/JAK2/IL2/RELA/PTPRC/ABL1/PTPN11/FYN	11
BP	GO:0002687	positive regulation of leukocyte migration	8/103	148/18903	1.48e-06	9.9e-06	3.93e-06	TNF/IL6/MAPK3/MAPK1/APP/ABL1/LGALS3/PTK2B	8
BP	GO:0032147	activation of protein kinase activity	8/103	148/18903	1.48e-06	9.9e-06	3.93e-06	SRC/EGFR/MTOR/JAK2/ABL1/DRD2/PTK2B/ADRB2	8
BP	GO:0009259	ribonucleotide metabolic process	13/103	466/18903	1.5e-06	9.96e-06	3.95e-06	GAPDH/STAT3/HIF1A/MTOR/EP300/PARP1/APP/PPARA/HMGCR/SNCA/VCP/XDH/LDHA	13
BP	GO:0019233	sensory perception of pain	7/103	103/18903	1.5e-06	9.96e-06	3.95e-06	TNF/MAPK3/PTGS2/ACE/FYN/NTRK1/OPRM1	7
BP	GO:1903076	regulation of protein localization to plasma membrane	7/103	103/18903	1.5e-06	9.96e-06	3.95e-06	AKT1/TNF/EGFR/BCL2L1/AR/ITGB1/LGALS3	7
BP	GO:0008202	steroid metabolic process	11/103	323/18903	1.51e-06	9.99e-06	3.96e-06	TNF/ESR1/SIRT1/APP/NR3C1/CYP3A4/HMGCR/CYP19A1/CYP1A2/G6PD/CYP2C9	11
BP	GO:0072503	cellular divalent inorganic cation homeostasis	11/103	323/18903	1.51e-06	9.99e-06	3.96e-06	BCL2/APP/PTPRC/PRKACA/FGF2/ABL1/SNCA/DRD2/PTK2B/CALM1/F2	11
BP	GO:0050867	positive regulation of cell activation	13/103	467/18903	1.53e-06	1.01e-05	4.02e-06	AKT1/TNF/IL6/SRC/BCL2/TLR4/JAK2/IL2/PTPRC/ABL1/PTPN11/PDGFRB/FYN	13
BP	GO:0015849	organic acid transport	11/103	324/18903	1.55e-06	1.03e-05	4.07e-06	AKT1/TNF/PPARG/PPARA/ITGB1/ACE/ABCB1/SNCA/ABCG2/NTRK2/DRD2	11
BP	GO:0072577	endothelial cell apoptotic process	6/103	66/18903	1.58e-06	1.04e-05	4.12e-06	TNF/KDR/BRAF/ABL1/NFE2L2/TERT	6
BP	GO:1903844	regulation of cellular response to transforming growth factor beta stimulus	8/103	150/18903	1.64e-06	1.08e-05	4.28e-06	PPARG/HSP90AB1/SIRT1/EP300/HDAC1/CREBBP/PPARA/HSPA5	8
BP	GO:0038179	neurotrophin signaling pathway	5/103	37/18903	1.65e-06	1.08e-05	4.3e-06	SRC/CASP3/PTPN11/NTRK1/NTRK2	5
BP	GO:0046326	positive regulation of glucose import	5/103	37/18903	1.65e-06	1.08e-05	4.3e-06	AKT1/MAPK14/PTPN11/NFE2L2/TERT	5
BP	GO:0051385	response to mineralocorticoid	5/103	37/18903	1.65e-06	1.08e-05	4.3e-06	SRC/CCND1/PARP1/ACE/MAOB	5
BP	GO:0032760	positive regulation of tumor necrosis factor production	7/103	105/18903	1.71e-06	1.11e-05	4.42e-06	IL6/STAT3/TLR4/JAK2/APP/PTPRC/PTPN11	7
BP	GO:1901796	regulation of signal transduction by p53 class mediator	7/103	105/18903	1.71e-06	1.11e-05	4.42e-06	AKT1/BCL2/MTOR/SIRT1/EP300/MDM2/AURKA	7
BP	GO:1901224	positive regulation of NIK/NF-kappaB signaling	6/103	67/18903	1.72e-06	1.12e-05	4.46e-06	TNF/EGFR/TLR4/EP300/RELA/APP	6
BP	GO:0006631	fatty acid metabolic process	12/103	400/18903	1.85e-06	1.2e-05	4.76e-06	AKT1/PPARG/PTGS2/SIRT1/MAPK14/PPARA/CYP3A4/FASN/SNCA/PTGS1/CYP1A2/CYP2C9	12
BP	GO:0043550	regulation of lipid kinase activity	6/103	68/18903	1.88e-06	1.22e-05	4.84e-06	SRC/CDC42/FGF2/PDGFRB/PTK2B/F2	6
BP	GO:1902808	positive regulation of cell cycle G1/S phase transition	6/103	68/18903	1.88e-06	1.22e-05	4.84e-06	AKT1/EGFR/CCND1/MDM2/EZH2/TERT	6
BP	GO:0006163	purine nucleotide metabolic process	13/103	476/18903	1.89e-06	1.22e-05	4.85e-06	GAPDH/STAT3/HIF1A/MTOR/EP300/PARP1/APP/PPARA/HMGCR/SNCA/VCP/XDH/LDHA	13
BP	GO:0010742	macrophage derived foam cell differentiation	5/103	38/18903	1.9e-06	1.22e-05	4.85e-06	PPARG/EP300/NFKBIA/PPARA/AGTR1	5
BP	GO:0032094	response to food	5/103	38/18903	1.9e-06	1.22e-05	4.85e-06	AKT1/PPARA/MPO/OPRM1/G6PD	5
BP	GO:0002285	lymphocyte activation involved in immune response	9/103	207/18903	1.96e-06	1.27e-05	5.02e-06	IL6/STAT3/MTOR/TLR4/IL2/PTPRC/ABL1/LGALS3/PTK2B	9
BP	GO:0009141	nucleoside triphosphate metabolic process	10/103	267/18903	1.99e-06	1.28e-05	5.08e-06	GAPDH/STAT3/HIF1A/MTOR/EP300/PARP1/APP/PPARA/VCP/LDHA	10
BP	GO:0051092	positive regulation of NF-kappaB transcription factor activity	8/103	154/18903	2e-06	1.28e-05	5.09e-06	TNF/STAT3/TLR4/EP300/RELA/APP/AR/NTRK1	8
BP	GO:0032869	cellular response to insulin stimulus	9/103	208/18903	2.04e-06	1.31e-05	5.2e-06	AKT1/SRC/PPARG/GSK3B/SIRT1/PARP1/GRB2/CDK4/PTPN11	9
BP	GO:0002260	lymphocyte homeostasis	6/103	69/18903	2.05e-06	1.31e-05	5.2e-06	AKT1/BCL2/CASP3/HIF1A/IL2/ABL1	6
BP	GO:0007004	telomere maintenance via telomerase	6/103	69/18903	2.05e-06	1.31e-05	5.2e-06	SRC/HSP90AA1/MAPK3/HSP90AB1/MAPK1/TERT	6
BP	GO:0014812	muscle cell migration	7/103	108/18903	2.06e-06	1.32e-05	5.22e-06	SRC/BCL2/TLR4/ACE/PDGFRB/NFE2L2/TERT	7
BP	GO:0016052	carbohydrate catabolic process	8/103	155/18903	2.1e-06	1.34e-05	5.31e-06	GAPDH/STAT3/HIF1A/MTOR/EP300/APP/PPARA/LDHA	8
BP	GO:0044703	multi-organism reproductive process	9/103	209/18903	2.12e-06	1.35e-05	5.37e-06	AKT1/BCL2/ESR1/PTGS2/MMP9/PARP1/AR/ACE/CTSB	9
BP	GO:0090077	foam cell differentiation	5/103	39/18903	2.16e-06	1.38e-05	5.46e-06	PPARG/EP300/NFKBIA/PPARA/AGTR1	5
BP	GO:0033209	tumor necrosis factor-mediated signaling pathway	7/103	109/18903	2.19e-06	1.39e-05	5.51e-06	TNF/JAK2/RELA/NFKBIA/CASP8/CASP1/PTK2B	7
BP	GO:1903557	positive regulation of tumor necrosis factor superfamily cytokine production	7/103	109/18903	2.19e-06	1.39e-05	5.51e-06	IL6/STAT3/TLR4/JAK2/APP/PTPRC/PTPN11	7
BP	GO:0008643	carbohydrate transport	8/103	156/18903	2.2e-06	1.39e-05	5.52e-06	AKT1/TNF/MAPK14/BRAF/PTPN11/ACE/NFE2L2/TERT	8
BP	GO:0043627	response to estrogen	6/103	70/18903	2.23e-06	1.41e-05	5.6e-06	HSP90AA1/ESR1/CCND1/EP300/AR/PDGFRB	6
BP	GO:0048754	branching morphogenesis of an epithelial tube	8/103	157/18903	2.31e-06	1.46e-05	5.78e-06	TNF/SRC/BCL2/ESR1/KDR/FGF2/ABL1/AR	8
BP	GO:0009615	response to virus	12/103	409/18903	2.32e-06	1.46e-05	5.8e-06	TNF/IL6/SRC/HSP90AA1/BCL2/HIF1A/BCL2L1/JAK2/RELA/PTPRC/MAPK14/CASP1	12
BP	GO:2000060	positive regulation of ubiquitin-dependent protein catabolic process	7/103	110/18903	2.33e-06	1.47e-05	5.82e-06	AKT1/GSK3B/MDM2/NFE2L2/AURKA/PTK2B/VCP	7
BP	GO:0031348	negative regulation of defense response	10/103	272/18903	2.35e-06	1.47e-05	5.85e-06	SRC/PPARG/IL2/PARP1/PTPRC/MAPK14/PPARA/FYN/DRD2/CYP19A1	10
BP	GO:0016051	carbohydrate biosynthetic process	9/103	212/18903	2.39e-06	1.5e-05	5.93e-06	AKT1/GSK3B/SIRT1/EP300/PPARA/NR3C1/SNCA/PTK2B/G6PD	9
BP	GO:0042098	T cell proliferation	9/103	212/18903	2.39e-06	1.5e-05	5.93e-06	IL6/CASP3/ERBB2/JAK2/IL2/PTPRC/ABL1/FYN/LGALS3	9
BP	GO:0051900	regulation of mitochondrial depolarization	4/103	18/18903	2.4e-06	1.5e-05	5.95e-06	SRC/BCL2/KDR/PARP1	4
BP	GO:0048246	macrophage chemotaxis	5/103	40/18903	2.46e-06	1.54e-05	6.1e-06	MAPK3/MAPK1/LGALS3/CYP19A1/PTK2B	5
BP	GO:0018958	phenol-containing compound metabolic process	7/103	111/18903	2.48e-06	1.54e-05	6.12e-06	BCL2/CTSB/SNCA/MAOA/DRD2/MAOB/COMT	7
BP	GO:1901222	regulation of NIK/NF-kappaB signaling	7/103	111/18903	2.48e-06	1.54e-05	6.12e-06	TNF/EGFR/TLR4/EP300/RELA/NFKBIA/APP	7
BP	GO:0033143	regulation of intracellular steroid hormone receptor signaling pathway	6/103	72/18903	2.64e-06	1.64e-05	6.49e-06	SRC/SIRT1/EP300/PARP1/HDAC1/AR	6
BP	GO:0042698	ovulation cycle	6/103	72/18903	2.64e-06	1.64e-05	6.49e-06	SRC/CASP3/ESR1/SIRT1/HSPA5/OPRM1	6
BP	GO:0051147	regulation of muscle cell differentiation	8/103	160/18903	2.66e-06	1.65e-05	6.53e-06	BCL2/MTOR/SIRT1/MDM2/MAPK14/EZH2/PPARA/G6PD	8
BP	GO:0051348	negative regulation of transferase activity	10/103	276/18903	2.67e-06	1.65e-05	6.56e-06	AKT1/SRC/CASP3/PPARG/GSK3B/SIRT1/PTPRC/ABL1/HMGCR/SNCA	10
BP	GO:0042417	dopamine metabolic process	5/103	41/18903	2.79e-06	1.72e-05	6.83e-06	SNCA/MAOA/DRD2/MAOB/COMT	5
BP	GO:0150077	regulation of neuroinflammatory response	5/103	41/18903	2.79e-06	1.72e-05	6.83e-06	TNF/IL6/PTGS2/MMP9/PTPRC	5
BP	GO:0044706	multi-multicellular organism process	9/103	218/18903	3e-06	1.85e-05	7.33e-06	AKT1/BCL2/ESR1/PTGS2/MMP9/PARP1/AR/ACE/CTSB	9
BP	GO:1902176	negative regulation of oxidative stress-induced intrinsic apoptotic signaling pathway	4/103	19/18903	3.03e-06	1.86e-05	7.38e-06	AKT1/HIF1A/SIRT1/NFE2L2	4
BP	GO:0006875	cellular metal ion homeostasis	12/103	420/18903	3.05e-06	1.87e-05	7.43e-06	BCL2/HIF1A/APP/PTPRC/PRKACA/FGF2/ABL1/SNCA/DRD2/PTK2B/CALM1/F2	12
BP	GO:0035924	cellular response to vascular endothelial growth factor stimulus	6/103	74/18903	3.1e-06	1.9e-05	7.54e-06	AKT1/KDR/RELA/MAPK14/PDGFRB/XDH	6
BP	GO:0042303	molting cycle	7/103	115/18903	3.14e-06	1.92e-05	7.6e-06	TNF/EGFR/BCL2/PTGS2/RELA/HDAC1/TERT	7
BP	GO:0042633	hair cycle	7/103	115/18903	3.14e-06	1.92e-05	7.6e-06	TNF/EGFR/BCL2/PTGS2/RELA/HDAC1/TERT	7
BP	GO:1904892	regulation of receptor signaling pathway via STAT	7/103	115/18903	3.14e-06	1.92e-05	7.6e-06	TNF/IL6/PPARG/JAK2/PTPRC/PTK2B/F2	7
BP	GO:0071354	cellular response to interleukin-6	5/103	42/18903	3.16e-06	1.92e-05	7.61e-06	IL6/SRC/STAT3/JAK2/RELA	5
BP	GO:1900274	regulation of phospholipase C activity	5/103	42/18903	3.16e-06	1.92e-05	7.61e-06	EGFR/ESR1/FGF2/ABL1/PDGFRB	5
BP	GO:0060537	muscle tissue development	12/103	422/18903	3.21e-06	1.95e-05	7.72e-06	BCL2/MTOR/EP300/CDC42/MAPK14/FGF2/ABL1/PPARA/ITGB1/PDGFRB/CDK1/G6PD	12
BP	GO:0002065	columnar/cuboidal epithelial cell differentiation	7/103	116/18903	3.33e-06	2.02e-05	8e-06	AKT1/SRC/HIF1A/GSK3B/FGF2/ABL1/FASN	7
BP	GO:0006278	RNA-templated DNA biosynthetic process	6/103	75/18903	3.36e-06	2.03e-05	8.05e-06	SRC/HSP90AA1/MAPK3/HSP90AB1/MAPK1/TERT	6
BP	GO:0071479	cellular response to ionizing radiation	6/103	75/18903	3.36e-06	2.03e-05	8.05e-06	SIRT1/MDM2/BCL2L1/GRB2/MAPK14/HSPA5	6
BP	GO:0045861	negative regulation of proteolysis	11/103	352/18903	3.46e-06	2.09e-05	8.27e-06	GAPDH/AKT1/TNF/SRC/HSP90AB1/PTGS2/MMP9/APP/CTSB/SNCA/F2	11
BP	GO:0010810	regulation of cell-substrate adhesion	9/103	222/18903	3.49e-06	2.1e-05	8.33e-06	SRC/BCL2/GSK3B/JAK2/KDR/CDC42/BRAF/ABL1/PTK2B	9
BP	GO:0046632	alpha-beta T cell differentiation	7/103	117/18903	3.52e-06	2.12e-05	8.41e-06	IL6/STAT3/BCL2/MTOR/IL2/BRAF/ABL1	7
BP	GO:0031952	regulation of protein autophosphorylation	5/103	43/18903	3.56e-06	2.14e-05	8.48e-06	SRC/JUN/PTPRC/ACE/CALM1	5
BP	GO:0010822	positive regulation of mitochondrion organization	6/103	76/18903	3.63e-06	2.18e-05	8.63e-06	HIF1A/MMP9/GSK3B/KDR/MAPK8/AURKA	6
BP	GO:0043200	response to amino acid	7/103	118/18903	3.73e-06	2.23e-05	8.85e-06	TNF/EGFR/CASP3/MTOR/BCL2L1/FYN/NTRK2	7
BP	GO:0071346	cellular response to interferon-gamma	7/103	118/18903	3.73e-06	2.23e-05	8.85e-06	GAPDH/TNF/PPARG/TLR4/JAK2/CDC42/CASP1	7
BP	GO:0030220	platelet formation	4/103	20/18903	3.77e-06	2.24e-05	8.9e-06	CASP3/EP300/PTPN11/CASP9	4
BP	GO:0060749	mammary gland alveolus development	4/103	20/18903	3.77e-06	2.24e-05	8.9e-06	ESR1/HIF1A/CCND1/AR	4
BP	GO:0061377	mammary gland lobule development	4/103	20/18903	3.77e-06	2.24e-05	8.9e-06	ESR1/HIF1A/CCND1/AR	4
BP	GO:0031279	regulation of cyclase activity	6/103	77/18903	3.92e-06	2.33e-05	9.24e-06	MAPK3/MAPK14/MAPK8/DRD2/ADRB2/CALM1	6
BP	GO:0014911	positive regulation of smooth muscle cell migration	5/103	44/18903	4e-06	2.37e-05	9.41e-06	SRC/BCL2/TLR4/PDGFRB/TERT	5
BP	GO:0051897	positive regulation of protein kinase B signaling	7/103	120/18903	4.17e-06	2.47e-05	9.79e-06	TNF/SRC/EGFR/HSP90AA1/HSP90AB1/FGF2/ITGB1	7
BP	GO:1904029	regulation of cyclin-dependent protein kinase activity	7/103	120/18903	4.17e-06	2.47e-05	9.79e-06	AKT1/SRC/EGFR/CASP3/HSP90AB1/CCND1/CCNA2	7
BP	GO:0034250	positive regulation of cellular amide metabolic process	8/103	170/18903	4.18e-06	2.47e-05	9.79e-06	TNF/IL6/CASP3/ERBB2/MTOR/RELA/NFE2L2/PTK2B	8
BP	GO:0043154	negative regulation of cysteine-type endopeptidase activity involved in apoptotic process	6/103	78/18903	4.22e-06	2.49e-05	9.88e-06	AKT1/TNF/SRC/PTGS2/MMP9/SNCA	6
BP	GO:0051966	regulation of synaptic transmission, glutamatergic	6/103	78/18903	4.22e-06	2.49e-05	9.88e-06	TNF/PTGS2/NTRK1/GRIN2B/DRD2/PTK2B	6
BP	GO:0046879	hormone secretion	10/103	291/18903	4.28e-06	2.52e-05	9.99e-06	TNF/IL6/HIF1A/PPARG/JAK2/PTPN11/REN/AGTR1/DRD2/CYP19A1	10
BP	GO:0001655	urogenital system development	11/103	360/18903	4.28e-06	2.52e-05	9.99e-06	BCL2/ESR1/MMP9/FGF2/AR/CASP9/ACE/PDGFRB/REN/AGTR1/CYP19A1	11
BP	GO:0090100	positive regulation of transmembrane receptor protein serine/threonine kinase signaling pathway	7/103	121/18903	4.41e-06	2.59e-05	1.03e-05	PPARG/HSP90AB1/EP300/JAK2/KDR/PARP1/CREBBP	7
BP	GO:0043620	regulation of DNA-templated transcription in response to stress	5/103	45/18903	4.48e-06	2.62e-05	1.04e-05	JUN/HIF1A/RELA/HSPA5/NFE2L2	5
BP	GO:0046427	positive regulation of receptor signaling pathway via JAK-STAT	5/103	45/18903	4.48e-06	2.62e-05	1.04e-05	TNF/IL6/JAK2/PTK2B/F2	5
BP	GO:0070741	response to interleukin-6	5/103	45/18903	4.48e-06	2.62e-05	1.04e-05	IL6/SRC/STAT3/JAK2/RELA	5
BP	GO:0048588	developmental cell growth	9/103	229/18903	4.49e-06	2.62e-05	1.04e-05	HSP90AA1/HSP90AB1/GSK3B/APP/ABL1/PPARA/ITGB1/AURKA/G6PD	9
BP	GO:0071498	cellular response to fluid shear stress	4/103	21/18903	4.63e-06	2.7e-05	1.07e-05	SRC/PTGS2/NFE2L2/PTK2B	4
BP	GO:0008286	insulin receptor signaling pathway	7/103	122/18903	4.66e-06	2.71e-05	1.07e-05	AKT1/SRC/GSK3B/SIRT1/GRB2/CDK4/PTPN11	7
BP	GO:0071230	cellular response to amino acid stimulus	6/103	80/18903	4.9e-06	2.85e-05	1.13e-05	TNF/EGFR/MTOR/BCL2L1/FYN/NTRK2	6
BP	GO:0071482	cellular response to light stimulus	7/103	123/18903	4.91e-06	2.85e-05	1.13e-05	PTGS2/MMP9/SIRT1/EP300/PARP1/CREBBP/CASP9	7
BP	GO:0097237	cellular response to toxic substance	7/103	123/18903	4.91e-06	2.85e-05	1.13e-05	TNF/PTGS2/NFE2L2/MPO/ABCG2/PTGS1/GSR	7
BP	GO:1990090	cellular response to nerve growth factor stimulus	5/103	46/18903	5e-06	2.89e-05	1.15e-05	AKT1/APP/HSPA5/NTRK1/NTRK2	5
BP	GO:2000273	positive regulation of signaling receptor activity	5/103	46/18903	5e-06	2.89e-05	1.15e-05	HIF1A/JAK2/HDAC1/ITGB1/ADRB2	5
BP	GO:0002263	cell activation involved in immune response	10/103	297/18903	5.13e-06	2.96e-05	1.17e-05	IL6/STAT3/MTOR/TLR4/IL2/APP/PTPRC/ABL1/LGALS3/PTK2B	10
BP	GO:0014855	striated muscle cell proliferation	6/103	81/18903	5.27e-06	3.04e-05	1.2e-05	SRC/JAK2/MAPK14/FGF2/ABL1/CDK1	6
BP	GO:0030336	negative regulation of cell migration	11/103	368/18903	5.28e-06	3.04e-05	1.21e-05	AKT1/TNF/STAT3/BCL2/PPARG/FGF2/HDAC1/BRAF/NFE2L2/DRD2/CYP19A1	11
BP	GO:0003014	renal system process	7/103	125/18903	5.47e-06	3.13e-05	1.24e-05	BCL2/PRKACA/ACE/REN/AGTR1/ABCG2/DRD2	7
BP	GO:0010811	positive regulation of cell-substrate adhesion	7/103	125/18903	5.47e-06	3.13e-05	1.24e-05	GSK3B/JAK2/KDR/CDC42/BRAF/ABL1/PTK2B	7
BP	GO:1904375	regulation of protein localization to cell periphery	7/103	125/18903	5.47e-06	3.13e-05	1.24e-05	AKT1/TNF/EGFR/BCL2L1/AR/ITGB1/LGALS3	7
BP	GO:0051972	regulation of telomerase activity	5/103	47/18903	5.57e-06	3.18e-05	1.26e-05	SRC/HSP90AA1/MAPK3/HSP90AB1/MAPK1	5
BP	GO:0140353	lipid export from cell	5/103	47/18903	5.57e-06	3.18e-05	1.26e-05	PTGS2/PTPN11/REN/AGTR1/CYP19A1	5
BP	GO:0009914	hormone transport	10/103	300/18903	5.6e-06	3.18e-05	1.26e-05	TNF/IL6/HIF1A/PPARG/JAK2/PTPN11/REN/AGTR1/DRD2/CYP19A1	10
BP	GO:0002223	stimulatory C-type lectin receptor signaling pathway	4/103	22/18903	5.64e-06	3.18e-05	1.26e-05	SRC/EP300/CREBBP/FYN	4
BP	GO:0036344	platelet morphogenesis	4/103	22/18903	5.64e-06	3.18e-05	1.26e-05	CASP3/EP300/PTPN11/CASP9	4
BP	GO:0044321	response to leptin	4/103	22/18903	5.64e-06	3.18e-05	1.26e-05	STAT3/CCND1/SIRT1/CCNA2	4
BP	GO:1903209	positive regulation of oxidative stress-induced cell death	4/103	22/18903	5.64e-06	3.18e-05	1.26e-05	TNF/TLR4/MCL1/ABL1	4
BP	GO:1990840	response to lectin	4/103	22/18903	5.64e-06	3.18e-05	1.26e-05	SRC/EP300/CREBBP/FYN	4
BP	GO:1990858	cellular response to lectin	4/103	22/18903	5.64e-06	3.18e-05	1.26e-05	SRC/EP300/CREBBP/FYN	4
BP	GO:2000831	regulation of steroid hormone secretion	4/103	22/18903	5.64e-06	3.18e-05	1.26e-05	PTPN11/REN/AGTR1/CYP19A1	4
BP	GO:0010975	regulation of neuron projection development	12/103	446/18903	5.64e-06	3.18e-05	1.26e-05	AKT1/GSK3B/EP300/EZH2/BRAF/ABL1/HSPA5/FYN/NFE2L2/NTRK1/NTRK2/PTK2B	12
BP	GO:0051279	regulation of release of sequestered calcium ion into cytosol	6/103	82/18903	5.66e-06	3.19e-05	1.26e-05	PRKACA/ABL1/SNCA/PTK2B/CALM1/F2	6
BP	GO:0072594	establishment of protein localization to organelle	12/103	449/18903	6.04e-06	3.4e-05	1.35e-05	AKT1/STAT3/HSP90AA1/HSP90AB1/PTGS2/JAK2/NFKBIA/MAPK14/MAPK8/HSPA5/CDK1/TERT	12
BP	GO:0060759	regulation of response to cytokine stimulus	8/103	179/18903	6.11e-06	3.43e-05	1.36e-05	IL6/HIF1A/PPARG/TLR4/PTPRC/CASP8/PTPN11/CASP1	8
BP	GO:0002696	positive regulation of leukocyte activation	12/103	450/18903	6.17e-06	3.46e-05	1.37e-05	AKT1/TNF/IL6/SRC/BCL2/TLR4/JAK2/IL2/PTPRC/ABL1/PTPN11/FYN	12
BP	GO:0045981	positive regulation of nucleotide metabolic process	5/103	48/18903	6.19e-06	3.46e-05	1.37e-05	HIF1A/MTOR/APP/PPARA/VCP	5
BP	GO:0048538	thymus development	5/103	48/18903	6.19e-06	3.46e-05	1.37e-05	BCL2/MAPK3/MAPK1/BRAF/ABL1	5
BP	GO:1900544	positive regulation of purine nucleotide metabolic process	5/103	48/18903	6.19e-06	3.46e-05	1.37e-05	HIF1A/MTOR/APP/PPARA/VCP	5
BP	GO:1990089	response to nerve growth factor	5/103	48/18903	6.19e-06	3.46e-05	1.37e-05	AKT1/APP/HSPA5/NTRK1/NTRK2	5
BP	GO:0021700	developmental maturation	10/103	304/18903	6.29e-06	3.51e-05	1.39e-05	BCL2/HIF1A/PPARG/KDR/APP/PRKACA/REN/AURKA/PTK2B/G6PD	10
BP	GO:0050670	regulation of lymphocyte proliferation	9/103	239/18903	6.35e-06	3.53e-05	1.4e-05	IL6/BCL2/CASP3/ERBB2/TLR4/JAK2/IL2/PTPRC/LGALS3	9
BP	GO:0097194	execution phase of apoptosis	6/103	84/18903	6.51e-06	3.62e-05	1.44e-05	AKT1/IL6/CASP3/BCL2L1/CASP8/CASP9	6
BP	GO:0051928	positive regulation of calcium ion transport	7/103	129/18903	6.73e-06	3.74e-05	1.48e-05	ABL1/PDGFRB/SNCA/LGALS3/G6PD/CALM1/F2	7
BP	GO:0002363	alpha-beta T cell lineage commitment	4/103	23/18903	6.8e-06	3.77e-05	1.49e-05	IL6/STAT3/BCL2/MTOR	4
BP	GO:1904894	positive regulation of receptor signaling pathway via STAT	5/103	49/18903	6.87e-06	3.8e-05	1.51e-05	TNF/IL6/JAK2/PTK2B/F2	5
BP	GO:2000378	negative regulation of reactive oxygen species metabolic process	5/103	49/18903	6.87e-06	3.8e-05	1.51e-05	BCL2/HIF1A/PPARA/FYN/G6PD	5
BP	GO:0046890	regulation of lipid biosynthetic process	8/103	182/18903	6.91e-06	3.81e-05	1.51e-05	AKT1/TNF/PTGS2/MTOR/SIRT1/CDK4/PPARA/NR3C1	8
BP	GO:0008625	extrinsic apoptotic signaling pathway via death domain receptors	6/103	85/18903	6.98e-06	3.85e-05	1.53e-05	TNF/BCL2/GSK3B/BCL2L1/CASP8/LGALS3	6
BP	GO:0071466	cellular response to xenobiotic stimulus	8/103	183/18903	7.19e-06	3.96e-05	1.57e-05	BRAF/HSPA5/NFE2L2/CYP3A4/REN/ABCB1/CYP1A2/CYP2C9	8
BP	GO:0050728	negative regulation of inflammatory response	8/103	184/18903	7.48e-06	4.11e-05	1.63e-05	SRC/PPARG/IL2/PTPRC/MAPK14/PPARA/FYN/CYP19A1	8
BP	GO:0002066	columnar/cuboidal epithelial cell development	5/103	50/18903	7.6e-06	4.17e-05	1.65e-05	AKT1/SRC/HIF1A/GSK3B/FASN	5
BP	GO:2000146	negative regulation of cell motility	11/103	383/18903	7.7e-06	4.23e-05	1.68e-05	AKT1/TNF/STAT3/BCL2/PPARG/FGF2/HDAC1/BRAF/NFE2L2/DRD2/CYP19A1	11
BP	GO:1901617	organic hydroxy compound biosynthetic process	9/103	245/18903	7.76e-06	4.25e-05	1.68e-05	TNF/SIRT1/FGF2/CYP3A4/HMGCR/SNCA/CYP19A1/PTK2B/G6PD	9
BP	GO:0002040	sprouting angiogenesis	8/103	185/18903	7.79e-06	4.25e-05	1.68e-05	AKT1/PTGS2/KDR/FGF2/ABL1/ITGB1/AGTR1/PTK2B	8
BP	GO:0032200	telomere organization	8/103	185/18903	7.79e-06	4.25e-05	1.68e-05	SRC/HSP90AA1/MAPK3/HSP90AB1/MAPK1/PARP1/EZH2/TERT	8
BP	GO:2000045	regulation of G1/S transition of mitotic cell cycle	8/103	185/18903	7.79e-06	4.25e-05	1.68e-05	AKT1/EGFR/BCL2/CCND1/MDM2/EZH2/CDK2/TERT	8
BP	GO:0001892	embryonic placenta development	6/103	87/18903	7.98e-06	4.34e-05	1.72e-05	AKT1/EGFR/HIF1A/MAPK1/GRB2/CASP8	6
BP	GO:0010507	negative regulation of autophagy	6/103	87/18903	7.98e-06	4.34e-05	1.72e-05	AKT1/STAT3/BCL2/MTOR/MCL1/SNCA	6
BP	GO:0019915	lipid storage	6/103	87/18903	7.98e-06	4.34e-05	1.72e-05	TNF/IL6/PPARG/SIRT1/NFKBIA/PPARA	6
BP	GO:0001649	osteoblast differentiation	9/103	246/18903	8.02e-06	4.35e-05	1.72e-05	AKT1/TNF/IL6/PPARG/GSK3B/MAPK14/PRKACA/FGF2/FASN	9
BP	GO:0010623	programmed cell death involved in cell development	4/103	24/18903	8.12e-06	4.4e-05	1.74e-05	BCL2/BCL2L1/FGF2/NTRK1	4
BP	GO:0048011	neurotrophin TRK receptor signaling pathway	4/103	24/18903	8.12e-06	4.4e-05	1.74e-05	SRC/CASP3/PTPN11/NTRK1	4
BP	GO:0002244	hematopoietic progenitor cell differentiation	7/103	133/18903	8.23e-06	4.44e-05	1.76e-05	BCL2/KDR/PTPRC/BRAF/ABL1/ACE/NFE2L2	7
BP	GO:0030168	platelet activation	7/103	133/18903	8.23e-06	4.44e-05	1.76e-05	IL6/SRC/TLR4/JAK2/MAPK14/PRKCA/F2	7
BP	GO:0022602	ovulation cycle process	5/103	51/18903	8.38e-06	4.51e-05	1.79e-05	SRC/CASP3/ESR1/SIRT1/HSPA5	5
BP	GO:0043124	negative regulation of I-kappaB kinase/NF-kappaB signaling	5/103	51/18903	8.38e-06	4.51e-05	1.79e-05	ESR1/SIRT1/HDAC1/CASP8/ABL1	5
BP	GO:0060324	face development	5/103	51/18903	8.38e-06	4.51e-05	1.79e-05	MAPK3/MAPK1/EP300/BRAF/PTPN11	5
BP	GO:0002312	B cell activation involved in immune response	6/103	88/18903	8.53e-06	4.58e-05	1.82e-05	IL6/TLR4/IL2/PTPRC/ABL1/PTK2B	6
BP	GO:0042593	glucose homeostasis	9/103	248/18903	8.55e-06	4.59e-05	1.82e-05	AKT1/IL6/STAT3/HIF1A/PPARG/SIRT1/PRKACA/PTPN11/ACE	9
BP	GO:0001654	eye development	11/103	388/18903	8.71e-06	4.66e-05	1.85e-05	EGFR/STAT3/BCL2/JUN/HIF1A/KDR/FGF2/HDAC1/PDGFRB/NTRK2/DRD2	11
BP	GO:0033500	carbohydrate homeostasis	9/103	249/18903	8.84e-06	4.72e-05	1.87e-05	AKT1/IL6/STAT3/HIF1A/PPARG/SIRT1/PRKACA/PTPN11/ACE	9
BP	GO:1902105	regulation of leukocyte differentiation	10/103	317/18903	9.08e-06	4.85e-05	1.92e-05	TNF/ERBB2/MTOR/TLR4/IL2/PTPRC/CASP8/BRAF/ABL1/PRKCA	10
BP	GO:0043123	positive regulation of I-kappaB kinase/NF-kappaB signaling	8/103	189/18903	9.11e-06	4.85e-05	1.92e-05	GAPDH/TNF/TLR4/RELA/CASP8/ABL1/CASP1/FYN	8
BP	GO:0071229	cellular response to acid chemical	6/103	89/18903	9.11e-06	4.85e-05	1.92e-05	TNF/EGFR/MTOR/BCL2L1/FYN/NTRK2	6
BP	GO:0010543	regulation of platelet activation	5/103	52/18903	9.24e-06	4.91e-05	1.95e-05	IL6/TLR4/JAK2/PRKCA/F2	5
BP	GO:0048013	ephrin receptor signaling pathway	5/103	52/18903	9.24e-06	4.91e-05	1.95e-05	SRC/MMP9/PTPN11/FYN/NTRK1	5
BP	GO:0050870	positive regulation of T cell activation	9/103	251/18903	9.42e-06	5e-05	1.98e-05	AKT1/IL6/SRC/JAK2/IL2/PTPRC/ABL1/PTPN11/FYN	9
BP	GO:1903052	positive regulation of proteolysis involved in protein catabolic process	7/103	136/18903	9.53e-06	5.05e-05	2e-05	AKT1/GSK3B/MDM2/NFE2L2/AURKA/PTK2B/VCP	7
BP	GO:0150063	visual system development	11/103	392/18903	9.59e-06	5.06e-05	2.01e-05	EGFR/STAT3/BCL2/JUN/HIF1A/KDR/FGF2/HDAC1/PDGFRB/NTRK2/DRD2	11
BP	GO:0019058	viral life cycle	10/103	319/18903	9.59e-06	5.06e-05	2.01e-05	TNF/EGFR/BCL2/HSP90AB1/PPARA/ITGB1/CDK1/CTSB/AGTR1/VCP	10
BP	GO:0060326	cell chemotaxis	10/103	319/18903	9.59e-06	5.06e-05	2.01e-05	IL6/MAPK3/MAPK1/KDR/FGF2/PDGFRB/AGTR1/LGALS3/CYP19A1/PTK2B	10
BP	GO:0048762	mesenchymal cell differentiation	9/103	252/18903	9.73e-06	5.12e-05	2.03e-05	IL6/BCL2/HIF1A/MAPK3/MTOR/GSK3B/MAPK1/CDC42/EZH2	9
BP	GO:1903320	regulation of protein modification by small protein conjugation or removal	9/103	252/18903	9.73e-06	5.12e-05	2.03e-05	AKT1/HSP90AA1/HIF1A/HSP90AB1/RELA/ABL1/HSPA5/FYN/VCP	9
BP	GO:0009409	response to cold	5/103	53/18903	1.02e-05	5.34e-05	2.12e-05	HSP90AA1/NFKBIA/PRKACA/CASP8/ADRB2	5
BP	GO:0030901	midbrain development	6/103	91/18903	1.04e-05	5.43e-05	2.15e-05	CDC42/FGF2/HSPA5/MAOB/G6PD/CALM1	6
BP	GO:2000117	negative regulation of cysteine-type endopeptidase activity	6/103	91/18903	1.04e-05	5.43e-05	2.15e-05	AKT1/TNF/SRC/PTGS2/MMP9/SNCA	6
BP	GO:0050852	T cell receptor signaling pathway	7/103	139/18903	1.1e-05	5.76e-05	2.28e-05	MAPK1/RELA/PTPRC/BRAF/ABL1/FYN/LGALS3	7
BP	GO:0009791	post-embryonic development	6/103	92/18903	1.1e-05	5.76e-05	2.28e-05	BCL2/MTOR/JAK2/KDR/ABL1/CYP1A2	6
BP	GO:0010657	muscle cell apoptotic process	6/103	92/18903	1.1e-05	5.76e-05	2.28e-05	HSP90AA1/PPARG/SIRT1/JAK2/NFE2L2/PTK2B	6
BP	GO:0048880	sensory system development	11/103	398/18903	1.11e-05	5.76e-05	2.29e-05	EGFR/STAT3/BCL2/JUN/HIF1A/KDR/FGF2/HDAC1/PDGFRB/NTRK2/DRD2	11
BP	GO:0030520	intracellular estrogen receptor signaling pathway	5/103	54/18903	1.11e-05	5.8e-05	2.3e-05	SRC/ESR1/PARP1/AR/ESR2	5
BP	GO:1904031	positive regulation of cyclin-dependent protein kinase activity	5/103	54/18903	1.11e-05	5.8e-05	2.3e-05	AKT1/SRC/EGFR/HSP90AB1/CCND1	5
BP	GO:0002433	immune response-regulating cell surface receptor signaling pathway involved in phagocytosis	4/103	26/18903	1.13e-05	5.87e-05	2.33e-05	SRC/PTPRC/ABL1/FYN	4
BP	GO:0035994	response to muscle stretch	4/103	26/18903	1.13e-05	5.87e-05	2.33e-05	JUN/RELA/NFKBIA/MAPK14	4
BP	GO:0038096	Fc-gamma receptor signaling pathway involved in phagocytosis	4/103	26/18903	1.13e-05	5.87e-05	2.33e-05	SRC/PTPRC/ABL1/FYN	4
BP	GO:0070102	interleukin-6-mediated signaling pathway	4/103	26/18903	1.13e-05	5.87e-05	2.33e-05	IL6/SRC/STAT3/JAK2	4
BP	GO:0032872	regulation of stress-activated MAPK cascade	8/103	195/18903	1.14e-05	5.91e-05	2.34e-05	TNF/EGFR/MAPK3/TLR4/MAPK1/APP/PTK2B/XDH	8
BP	GO:0051251	positive regulation of lymphocyte activation	11/103	400/18903	1.16e-05	5.98e-05	2.37e-05	AKT1/IL6/SRC/BCL2/TLR4/JAK2/IL2/PTPRC/ABL1/PTPN11/FYN	11
BP	GO:0050886	endocrine process	6/103	93/18903	1.17e-05	6.04e-05	2.39e-05	PPARG/PTPN11/ACE/REN/AGTR1/CYP19A1	6
BP	GO:0055017	cardiac muscle tissue growth	6/103	93/18903	1.17e-05	6.04e-05	2.39e-05	MAPK14/FGF2/ABL1/PPARA/CDK1/G6PD	6
BP	GO:2000106	regulation of leukocyte apoptotic process	6/103	93/18903	1.17e-05	6.04e-05	2.39e-05	BCL2/HIF1A/SIRT1/BCL2L1/IL2/LGALS3	6
BP	GO:0001889	liver development	7/103	141/18903	1.21e-05	6.19e-05	2.46e-05	TNF/IL6/JUN/CCND1/RELA/EZH2/AURKA	7
BP	GO:0006986	response to unfolded protein	7/103	141/18903	1.21e-05	6.19e-05	2.46e-05	HSP90AA1/HSP90AB1/CCND1/EP300/HSPA5/NFE2L2/VCP	7
BP	GO:0006584	catecholamine metabolic process	5/103	55/18903	1.22e-05	6.21e-05	2.46e-05	SNCA/MAOA/DRD2/MAOB/COMT	5
BP	GO:0009712	catechol-containing compound metabolic process	5/103	55/18903	1.22e-05	6.21e-05	2.46e-05	SNCA/MAOA/DRD2/MAOB/COMT	5
BP	GO:0010518	positive regulation of phospholipase activity	5/103	55/18903	1.22e-05	6.21e-05	2.46e-05	EGFR/ESR1/FGF2/PDGFRB/AGTR1	5
BP	GO:0038093	Fc receptor signaling pathway	5/103	55/18903	1.22e-05	6.21e-05	2.46e-05	SRC/PTPRC/ABL1/MAPK8/FYN	5
BP	GO:0042743	hydrogen peroxide metabolic process	5/103	55/18903	1.22e-05	6.21e-05	2.46e-05	FYN/MPO/SNCA/MAOB/CYP1A2	5
BP	GO:1900087	positive regulation of G1/S transition of mitotic cell cycle	5/103	55/18903	1.22e-05	6.21e-05	2.46e-05	AKT1/EGFR/CCND1/MDM2/TERT	5
BP	GO:1903202	negative regulation of oxidative stress-induced cell death	5/103	55/18903	1.22e-05	6.21e-05	2.46e-05	AKT1/HIF1A/SIRT1/FYN/NFE2L2	5
BP	GO:0002042	cell migration involved in sprouting angiogenesis	6/103	94/18903	1.25e-05	6.33e-05	2.51e-05	AKT1/PTGS2/KDR/FGF2/ABL1/ITGB1	6
BP	GO:0032436	positive regulation of proteasomal ubiquitin-dependent protein catabolic process	6/103	94/18903	1.25e-05	6.33e-05	2.51e-05	AKT1/GSK3B/MDM2/NFE2L2/AURKA/VCP	6
BP	GO:0022411	cellular component disassembly	12/103	483/18903	1.26e-05	6.37e-05	2.53e-05	TNF/IL6/HIF1A/MMP9/GSK3B/PRKCA/CDK1/AURKA/CTSS/VCP/ADRB2/CALM1	12
BP	GO:0070302	regulation of stress-activated protein kinase signaling cascade	8/103	198/18903	1.28e-05	6.47e-05	2.56e-05	TNF/EGFR/MAPK3/TLR4/MAPK1/APP/PTK2B/XDH	8
BP	GO:0010875	positive regulation of cholesterol efflux	4/103	27/18903	1.32e-05	6.68e-05	2.65e-05	PPARG/SIRT1/NFKBIA/RXRA	4
BP	GO:0035929	steroid hormone secretion	4/103	27/18903	1.32e-05	6.68e-05	2.65e-05	PTPN11/REN/AGTR1/CYP19A1	4
BP	GO:2000737	negative regulation of stem cell differentiation	4/103	27/18903	1.32e-05	6.68e-05	2.65e-05	STAT3/GSK3B/EZH2/NFE2L2	4
BP	GO:0010676	positive regulation of cellular carbohydrate metabolic process	5/103	56/18903	1.33e-05	6.7e-05	2.66e-05	AKT1/SRC/SIRT1/PPARA/SNCA	5
BP	GO:0043551	regulation of phosphatidylinositol 3-kinase activity	5/103	56/18903	1.33e-05	6.7e-05	2.66e-05	SRC/CDC42/FGF2/PDGFRB/PTK2B	5
BP	GO:0060986	endocrine hormone secretion	5/103	56/18903	1.33e-05	6.7e-05	2.66e-05	PPARG/PTPN11/REN/AGTR1/CYP19A1	5
BP	GO:0010466	negative regulation of peptidase activity	9/103	263/18903	1.37e-05	6.87e-05	2.72e-05	GAPDH/AKT1/TNF/SRC/PTGS2/MMP9/APP/CTSB/SNCA	9
BP	GO:0050921	positive regulation of chemotaxis	7/103	144/18903	1.38e-05	6.93e-05	2.75e-05	IL6/MAPK3/MAPK1/KDR/FGF2/PDGFRB/PTK2B	7
BP	GO:0061008	hepaticobiliary system development	7/103	144/18903	1.38e-05	6.93e-05	2.75e-05	TNF/IL6/JUN/CCND1/RELA/EZH2/AURKA	7
BP	GO:0019217	regulation of fatty acid metabolic process	6/103	96/18903	1.41e-05	7.03e-05	2.79e-05	AKT1/PPARG/PTGS2/SIRT1/PPARA/SNCA	6
BP	GO:0051153	regulation of striated muscle cell differentiation	6/103	96/18903	1.41e-05	7.03e-05	2.79e-05	BCL2/MTOR/MAPK14/EZH2/PPARA/G6PD	6
BP	GO:0031644	regulation of nervous system process	7/103	145/18903	1.45e-05	7.22e-05	2.86e-05	TNF/SRC/APP/GRIN2B/PTK2B/ADRB2/OPRM1	7
BP	GO:0022408	negative regulation of cell-cell adhesion	8/103	202/18903	1.48e-05	7.36e-05	2.92e-05	AKT1/CASP3/ERBB2/JAK2/IL2/ABL1/PPARA/LGALS3	8
BP	GO:0030111	regulation of Wnt signaling pathway	10/103	336/18903	1.5e-05	7.48e-05	2.97e-05	SRC/EGFR/GSK3B/APP/MAPK14/FGF2/HDAC1/ABL1/TERT/VCP	10
BP	GO:0051701	biological process involved in interaction with host	8/103	203/18903	1.53e-05	7.59e-05	3.01e-05	SRC/EGFR/HSP90AB1/BCL2L1/ITGB1/CDK1/CTSB/AGTR1	8
BP	GO:0002052	positive regulation of neuroblast proliferation	4/103	28/18903	1.54e-05	7.59e-05	3.01e-05	HIF1A/FGF2/ITGB1/DRD2	4
BP	GO:0010758	regulation of macrophage chemotaxis	4/103	28/18903	1.54e-05	7.59e-05	3.01e-05	MAPK3/MAPK1/CYP19A1/PTK2B	4
BP	GO:0010971	positive regulation of G2/M transition of mitotic cell cycle	4/103	28/18903	1.54e-05	7.59e-05	3.01e-05	CCND1/APP/CDK4/CDK1	4
BP	GO:0032104	regulation of response to extracellular stimulus	4/103	28/18903	1.54e-05	7.59e-05	3.01e-05	BCL2/PPARA/RXRA/OPRM1	4
BP	GO:0032107	regulation of response to nutrient levels	4/103	28/18903	1.54e-05	7.59e-05	3.01e-05	BCL2/PPARA/RXRA/OPRM1	4
BP	GO:1904385	cellular response to angiotensin	4/103	28/18903	1.54e-05	7.59e-05	3.01e-05	SRC/RELA/NFE2L2/AGTR1	4
BP	GO:0045598	regulation of fat cell differentiation	7/103	147/18903	1.58e-05	7.8e-05	3.09e-05	AKT1/TNF/IL6/PPARG/PTGS2/SIRT1/MAPK14	7
BP	GO:0031032	actomyosin structure organization	8/103	204/18903	1.59e-05	7.8e-05	3.09e-05	SRC/MTOR/CDC42/BRAF/ABL1/ITGB1/PDGFRB/PTK2B	8
BP	GO:0001541	ovarian follicle development	5/103	58/18903	1.59e-05	7.8e-05	3.09e-05	SRC/BCL2/ESR1/BCL2L1/KDR	5
BP	GO:0007204	positive regulation of cytosolic calcium ion concentration	8/103	205/18903	1.64e-05	8.07e-05	3.2e-05	BCL2/ESR1/JAK2/IL2/ABL1/AGTR1/DRD2/PTK2B	8
BP	GO:0043010	camera-type eye development	10/103	340/18903	1.67e-05	8.17e-05	3.24e-05	EGFR/STAT3/JUN/HIF1A/KDR/FGF2/HDAC1/PDGFRB/NTRK2/DRD2	10
BP	GO:0003300	cardiac muscle hypertrophy	6/103	99/18903	1.68e-05	8.21e-05	3.26e-05	PPARG/PARP1/EZH2/PPARA/PRKCA/G6PD	6
BP	GO:0010389	regulation of G2/M transition of mitotic cell cycle	6/103	99/18903	1.68e-05	8.21e-05	3.26e-05	CCND1/APP/CDK4/CDK2/CDK1/AURKA	6
BP	GO:0032755	positive regulation of interleukin-6 production	6/103	99/18903	1.68e-05	8.21e-05	3.26e-05	TNF/IL6/STAT3/TLR4/APP/PTPN11	6
BP	GO:0003018	vascular process in circulatory system	9/103	270/18903	1.69e-05	8.22e-05	3.26e-05	TNF/SRC/PTGS2/ABL1/ACE/ABCB1/AGTR1/ABCG2/ADRB2	9
BP	GO:1903078	positive regulation of protein localization to plasma membrane	5/103	59/18903	1.73e-05	8.41e-05	3.34e-05	AKT1/TNF/EGFR/ITGB1/LGALS3	5
BP	GO:0032946	positive regulation of mononuclear cell proliferation	7/103	149/18903	1.73e-05	8.41e-05	3.34e-05	IL6/BCL2/TLR4/BCL2L1/JAK2/IL2/PTPRC	7
BP	GO:0097254	renal tubular secretion	4/103	29/18903	1.78e-05	8.64e-05	3.43e-05	ACE/AGTR1/ABCG2/DRD2	4
BP	GO:0040013	negative regulation of locomotion	11/103	419/18903	1.78e-05	8.66e-05	3.43e-05	AKT1/TNF/STAT3/BCL2/PPARG/FGF2/HDAC1/BRAF/NFE2L2/DRD2/CYP19A1	11
BP	GO:0090596	sensory organ morphogenesis	9/103	272/18903	1.79e-05	8.67e-05	3.44e-05	STAT3/BCL2/HIF1A/MAPK3/MAPK1/KDR/FGF2/HDAC1/NTRK2	9
BP	GO:0030010	establishment of cell polarity	7/103	150/18903	1.81e-05	8.74e-05	3.47e-05	HSP90AA1/HSP90AB1/GSK3B/CDC42/ABL1/ITGB1/PTK2B	7
BP	GO:0032025	response to cobalt ion	3/103	10/18903	1.83e-05	8.84e-05	3.51e-05	CASP3/CASP8/CASP9	3
BP	GO:0042135	neurotransmitter catabolic process	3/103	10/18903	1.83e-05	8.84e-05	3.51e-05	MAOA/MAOB/COMT	3
BP	GO:0070391	response to lipoteichoic acid	3/103	10/18903	1.83e-05	8.84e-05	3.51e-05	TLR4/RELA/MAPK14	3
BP	GO:0071223	cellular response to lipoteichoic acid	3/103	10/18903	1.83e-05	8.84e-05	3.51e-05	TLR4/RELA/MAPK14	3
BP	GO:1905517	macrophage migration	5/103	60/18903	1.88e-05	9.03e-05	3.58e-05	MAPK3/MAPK1/LGALS3/CYP19A1/PTK2B	5
BP	GO:1903531	negative regulation of secretion by cell	7/103	151/18903	1.88e-05	9.06e-05	3.59e-05	BRAF/PTPN11/HMGCR/SNCA/DRD2/MAOB/OPRM1	7
BP	GO:0045732	positive regulation of protein catabolic process	8/103	209/18903	1.89e-05	9.08e-05	3.6e-05	AKT1/TNF/HSP90AA1/GSK3B/MDM2/NFE2L2/AURKA/VCP	8
BP	GO:0061448	connective tissue development	9/103	274/18903	1.89e-05	9.09e-05	3.6e-05	HIF1A/MAPK3/PPARG/SIRT1/MAPK14/FGF2/CDK4/PTPN11/PDGFRB	9
BP	GO:0014897	striated muscle hypertrophy	6/103	102/18903	1.99e-05	9.53e-05	3.78e-05	PPARG/PARP1/EZH2/PPARA/PRKCA/G6PD	6
BP	GO:0035249	synaptic transmission, glutamatergic	6/103	102/18903	1.99e-05	9.53e-05	3.78e-05	TNF/PTGS2/NTRK1/GRIN2B/DRD2/PTK2B	6
BP	GO:0060419	heart growth	6/103	102/18903	1.99e-05	9.53e-05	3.78e-05	MAPK14/FGF2/ABL1/PPARA/CDK1/G6PD	6
BP	GO:0046456	icosanoid biosynthetic process	5/103	61/18903	2.03e-05	9.71e-05	3.85e-05	PTGS2/SIRT1/CASP1/PTGS1/CYP2C9	5
BP	GO:0009651	response to salt stress	4/103	30/18903	2.04e-05	9.75e-05	3.86e-05	TNF/HSP90AA1/HSP90AB1/PTK2B	4
BP	GO:0030902	hindbrain development	7/103	153/18903	2.05e-05	9.78e-05	3.88e-05	BCL2/FGF2/EZH2/ABL1/ITGB1/PTPN11/HSPA5	7
BP	GO:0032677	regulation of interleukin-8 production	6/103	103/18903	2.11e-05	0.000100059	3.97e-05	TNF/IL6/STAT3/TLR4/RELA/PTPRC	6
BP	GO:0045639	positive regulation of myeloid cell differentiation	6/103	103/18903	2.11e-05	0.000100059	3.97e-05	TNF/STAT3/HIF1A/MAPK14/CASP8/PRKCA	6
BP	GO:0046620	regulation of organ growth	6/103	103/18903	2.11e-05	0.000100059	3.97e-05	AKT1/MAPK14/FGF2/PPARA/CDK1/G6PD	6
BP	GO:0000723	telomere maintenance	7/103	154/18903	2.14e-05	0.000101139	4.01e-05	SRC/HSP90AA1/MAPK3/HSP90AB1/MAPK1/PARP1/TERT	7
BP	GO:0016125	sterol metabolic process	7/103	154/18903	2.14e-05	0.000101139	4.01e-05	APP/CYP3A4/HMGCR/CYP19A1/CYP1A2/G6PD/CYP2C9	7
BP	GO:0034763	negative regulation of transmembrane transport	7/103	154/18903	2.14e-05	0.000101139	4.01e-05	AKT1/TNF/BCL2/MMP9/ACE/DRD2/CALM1	7
BP	GO:0098754	detoxification	7/103	154/18903	2.14e-05	0.000101139	4.01e-05	PTGS2/NFE2L2/MPO/ABCB1/ABCG2/PTGS1/GSR	7
BP	GO:1902806	regulation of cell cycle G1/S phase transition	8/103	213/18903	2.17e-05	0.000102211	4.05e-05	AKT1/EGFR/BCL2/CCND1/MDM2/EZH2/CDK2/TERT	8
BP	GO:0099601	regulation of neurotransmitter receptor activity	5/103	62/18903	2.2e-05	0.000103861	4.12e-05	SRC/APP/PTK2B/ADRB2/OPRM1	5
BP	GO:0014896	muscle hypertrophy	6/103	104/18903	2.23e-05	0.0001045	4.14e-05	PPARG/PARP1/EZH2/PPARA/PRKCA/G6PD	6
BP	GO:0032637	interleukin-8 production	6/103	104/18903	2.23e-05	0.0001045	4.14e-05	TNF/IL6/STAT3/TLR4/RELA/PTPRC	6
BP	GO:0042100	B cell proliferation	6/103	104/18903	2.23e-05	0.0001045	4.14e-05	BCL2/CASP3/TLR4/IL2/PTPRC/ABL1	6
BP	GO:0046425	regulation of receptor signaling pathway via JAK-STAT	6/103	104/18903	2.23e-05	0.0001045	4.14e-05	TNF/IL6/JAK2/PTPRC/PTK2B/F2	6
BP	GO:0008016	regulation of heart contraction	8/103	214/18903	2.24e-05	0.000104976	4.16e-05	TNF/HSP90AA1/MDM2/JAK2/IL2/PRKACA/DRD2/CALM1	8
BP	GO:0002220	innate immune response activating cell surface receptor signaling pathway	4/103	31/18903	2.34e-05	0.000109122	4.33e-05	SRC/EP300/CREBBP/FYN	4
BP	GO:0060603	mammary gland duct morphogenesis	4/103	31/18903	2.34e-05	0.000109122	4.33e-05	SRC/ESR1/AR/NR3C1	4
BP	GO:1902751	positive regulation of cell cycle G2/M phase transition	4/103	31/18903	2.34e-05	0.000109122	4.33e-05	CCND1/APP/CDK4/CDK1	4
BP	GO:0032757	positive regulation of interleukin-8 production	5/103	63/18903	2.38e-05	0.000111043	4.4e-05	TNF/IL6/STAT3/TLR4/RELA	5
BP	GO:0045453	bone resorption	5/103	63/18903	2.38e-05	0.000111043	4.4e-05	IL6/SRC/PRKCA/PTK2B/ADRB2	5
BP	GO:0006469	negative regulation of protein kinase activity	8/103	216/18903	2.39e-05	0.00011145	4.42e-05	AKT1/CASP3/PPARG/SIRT1/PTPRC/ABL1/HMGCR/SNCA	8
BP	GO:0072584	caveolin-mediated endocytosis	3/103	11/18903	2.51e-05	0.000116787	4.63e-05	SRC/MAPK3/MAPK1	3
BP	GO:0010906	regulation of glucose metabolic process	6/103	107/18903	2.62e-05	0.000121435	4.82e-05	AKT1/SRC/SIRT1/EP300/PPARA/NR3C1	6
BP	GO:0014013	regulation of gliogenesis	6/103	107/18903	2.62e-05	0.000121435	4.82e-05	TNF/IL6/MTOR/EZH2/HDAC1/F2	6
BP	GO:0001505	regulation of neurotransmitter levels	8/103	219/18903	2.64e-05	0.000122459	4.86e-05	GSK3B/BRAF/ITGB1/SNCA/MAOA/DRD2/MAOB/COMT	8
BP	GO:0009306	protein secretion	10/103	359/18903	2.65e-05	0.000122641	4.86e-05	TNF/IL6/HIF1A/PPARG/TLR4/JAK2/PTPN11/HMGCR/DRD2/OPRM1	10
BP	GO:0002758	innate immune response-activating signal transduction	4/103	32/18903	2.66e-05	0.000122641	4.86e-05	SRC/EP300/CREBBP/FYN	4
BP	GO:0010743	regulation of macrophage derived foam cell differentiation	4/103	32/18903	2.66e-05	0.000122641	4.86e-05	PPARG/NFKBIA/PPARA/AGTR1	4
BP	GO:1903715	regulation of aerobic respiration	4/103	32/18903	2.66e-05	0.000122641	4.86e-05	TNF/HIF1A/SNCA/VCP	4
BP	GO:0035592	establishment of protein localization to extracellular region	10/103	360/18903	2.72e-05	0.000125212	4.97e-05	TNF/IL6/HIF1A/PPARG/TLR4/JAK2/PTPN11/HMGCR/DRD2/OPRM1	10
BP	GO:0008637	apoptotic mitochondrial changes	6/103	108/18903	2.76e-05	0.000126715	5.03e-05	AKT1/BCL2/MMP9/GSK3B/BCL2L1/MAPK8	6
BP	GO:0062014	negative regulation of small molecule metabolic process	6/103	108/18903	2.76e-05	0.000126715	5.03e-05	AKT1/STAT3/SIRT1/EP300/PARP1/PPARA	6
BP	GO:0090398	cellular senescence	6/103	108/18903	2.76e-05	0.000126715	5.03e-05	SIRT1/MAPK14/ABL1/CDK2/MAPK8/TERT	6
BP	GO:1905330	regulation of morphogenesis of an epithelium	5/103	65/18903	2.78e-05	0.000127329	5.05e-05	TNF/ESR1/FGF2/ABL1/AR	5
BP	GO:0030038	contractile actin filament bundle assembly	6/103	109/18903	2.91e-05	0.000133059	5.28e-05	SRC/MTOR/CDC42/BRAF/ABL1/PTK2B	6
BP	GO:0043149	stress fiber assembly	6/103	109/18903	2.91e-05	0.000133059	5.28e-05	SRC/MTOR/CDC42/BRAF/ABL1/PTK2B	6
BP	GO:0001782	B cell homeostasis	4/103	33/18903	3.01e-05	0.000137109	5.44e-05	BCL2/CASP3/HIF1A/ABL1	4
BP	GO:0002431	Fc receptor mediated stimulatory signaling pathway	4/103	33/18903	3.01e-05	0.000137109	5.44e-05	SRC/PTPRC/ABL1/FYN	4
BP	GO:0038094	Fc-gamma receptor signaling pathway	4/103	33/18903	3.01e-05	0.000137109	5.44e-05	SRC/PTPRC/ABL1/FYN	4
BP	GO:0051968	positive regulation of synaptic transmission, glutamatergic	4/103	33/18903	3.01e-05	0.000137109	5.44e-05	PTGS2/NTRK1/GRIN2B/PTK2B	4
BP	GO:0071353	cellular response to interleukin-4	4/103	33/18903	3.01e-05	0.000137109	5.44e-05	HSP90AB1/CDK4/HSPA5/FASN	4
BP	GO:1902749	regulation of cell cycle G2/M phase transition	6/103	110/18903	3.06e-05	0.00013918	5.52e-05	CCND1/APP/CDK4/CDK2/CDK1/AURKA	6
BP	GO:0035966	response to topologically incorrect protein	7/103	163/18903	3.08e-05	0.000140058	5.55e-05	HSP90AA1/HSP90AB1/CCND1/EP300/HSPA5/NFE2L2/VCP	7
BP	GO:0007596	blood coagulation	8/103	225/18903	3.2e-05	0.000145144	5.76e-05	IL6/SRC/TLR4/JAK2/MAPK14/PRKCA/NFE2L2/F2	8
BP	GO:0006633	fatty acid biosynthetic process	7/103	164/18903	3.21e-05	0.000145144	5.76e-05	PTGS2/SIRT1/CYP3A4/FASN/PTGS1/CYP1A2/CYP2C9	7
BP	GO:0002366	leukocyte activation involved in immune response	9/103	293/18903	3.21e-05	0.000145144	5.76e-05	IL6/STAT3/MTOR/TLR4/IL2/PTPRC/ABL1/LGALS3/PTK2B	9
BP	GO:0030888	regulation of B cell proliferation	5/103	67/18903	3.22e-05	0.000145144	5.76e-05	BCL2/CASP3/TLR4/IL2/PTPRC	5
BP	GO:0042531	positive regulation of tyrosine phosphorylation of STAT protein	5/103	67/18903	3.22e-05	0.000145144	5.76e-05	TNF/IL6/JAK2/IL2/FYN	5
BP	GO:1904377	positive regulation of protein localization to cell periphery	5/103	67/18903	3.22e-05	0.000145144	5.76e-05	AKT1/TNF/EGFR/ITGB1/LGALS3	5
BP	GO:0042177	negative regulation of protein catabolic process	6/103	111/18903	3.22e-05	0.000145191	5.76e-05	EGFR/HSP90AB1/RELA/FYN/HMGCR/SNCA	6
BP	GO:0071692	protein localization to extracellular region	10/103	368/18903	3.27e-05	0.000147394	5.85e-05	TNF/IL6/HIF1A/PPARG/TLR4/JAK2/PTPN11/HMGCR/DRD2/OPRM1	10
BP	GO:0019336	phenol-containing compound catabolic process	3/103	12/18903	3.34e-05	0.000149793	5.94e-05	MAOA/MAOB/COMT	3
BP	GO:0060736	prostate gland growth	3/103	12/18903	3.34e-05	0.000149793	5.94e-05	ESR1/AR/CYP19A1	3
BP	GO:0031589	cell-substrate adhesion	10/103	369/18903	3.35e-05	0.000150322	5.96e-05	SRC/BCL2/GSK3B/JAK2/KDR/CDC42/BRAF/ABL1/ITGB1/PTK2B	10
BP	GO:0051973	positive regulation of telomerase activity	4/103	34/18903	3.4e-05	0.000152189	6.04e-05	HSP90AA1/MAPK3/HSP90AB1/MAPK1	4
BP	GO:0055094	response to lipoprotein particle	4/103	34/18903	3.4e-05	0.000152189	6.04e-05	AKT1/PPARG/TLR4/ITGB1	4
BP	GO:0060193	positive regulation of lipase activity	5/103	68/18903	3.46e-05	0.000154619	6.13e-05	EGFR/ESR1/FGF2/PDGFRB/AGTR1	5
BP	GO:0030217	T cell differentiation	9/103	296/18903	3.47e-05	0.000155124	6.15e-05	IL6/STAT3/BCL2/ERBB2/MTOR/IL2/PTPRC/BRAF/ABL1	9
BP	GO:0007229	integrin-mediated signaling pathway	6/103	113/18903	3.56e-05	0.000159012	6.31e-05	SRC/CDC42/ABL1/ITGB1/PTPN11/PTK2B	6
BP	GO:0001959	regulation of cytokine-mediated signaling pathway	7/103	167/18903	3.6e-05	0.000160517	6.37e-05	IL6/HIF1A/PPARG/PTPRC/CASP8/PTPN11/CASP1	7
BP	GO:0010611	regulation of cardiac muscle hypertrophy	5/103	69/18903	3.71e-05	0.000165075	6.55e-05	PPARG/PARP1/PPARA/PRKCA/G6PD	5
BP	GO:0055021	regulation of cardiac muscle tissue growth	5/103	69/18903	3.71e-05	0.000165075	6.55e-05	MAPK14/FGF2/PPARA/CDK1/G6PD	5
BP	GO:0050817	coagulation	8/103	230/18903	3.75e-05	0.000166253	6.59e-05	IL6/SRC/TLR4/JAK2/MAPK14/PRKCA/NFE2L2/F2	8
BP	GO:0050920	regulation of chemotaxis	8/103	230/18903	3.75e-05	0.000166253	6.59e-05	IL6/MAPK3/MAPK1/KDR/FGF2/PDGFRB/CYP19A1/PTK2B	8
BP	GO:0001893	maternal placenta development	4/103	35/18903	3.82e-05	0.000169063	6.7e-05	AKT1/PTGS2/PARP1/CTSB	4
BP	GO:0060218	hematopoietic stem cell differentiation	4/103	35/18903	3.82e-05	0.000169063	6.7e-05	BCL2/ABL1/ACE/NFE2L2	4
BP	GO:0090050	positive regulation of cell migration involved in sprouting angiogenesis	4/103	35/18903	3.82e-05	0.000169063	6.7e-05	PTGS2/KDR/FGF2/ABL1	4
BP	GO:0007599	hemostasis	8/103	231/18903	3.86e-05	0.000170705	6.77e-05	IL6/SRC/TLR4/JAK2/MAPK14/PRKCA/NFE2L2/F2	8
BP	GO:0002262	myeloid cell homeostasis	7/103	169/18903	3.89e-05	0.0001715	6.8e-05	IL6/STAT3/CASP3/HIF1A/JAK2/MAPK14/G6PD	7
BP	GO:1990748	cellular detoxification	6/103	115/18903	3.93e-05	0.000173447	6.88e-05	PTGS2/NFE2L2/MPO/ABCG2/PTGS1/GSR	6
BP	GO:0032722	positive regulation of chemokine production	5/103	70/18903	3.98e-05	0.000175285	6.95e-05	TNF/IL6/HIF1A/TLR4/APP	5
BP	GO:0060560	developmental growth involved in morphogenesis	8/103	233/18903	4.11e-05	0.000180676	7.17e-05	HSP90AA1/ESR1/HSP90AB1/GSK3B/APP/ABL1/ITGB1/AURKA	8
BP	GO:1904064	positive regulation of cation transmembrane transport	7/103	171/18903	4.19e-05	0.000184055	7.3e-05	ABL1/SNCA/CTSS/ADRB2/G6PD/CALM1/F2	7
BP	GO:0070670	response to interleukin-4	4/103	36/18903	4.28e-05	0.000187972	7.45e-05	HSP90AB1/CDK4/HSPA5/FASN	4
BP	GO:0010745	negative regulation of macrophage derived foam cell differentiation	3/103	13/18903	4.32e-05	0.000189157	7.5e-05	PPARG/NFKBIA/PPARA	3
BP	GO:0061029	eyelid development in camera-type eye	3/103	13/18903	4.32e-05	0.000189157	7.5e-05	EGFR/JUN/HDAC1	3
BP	GO:0000079	regulation of cyclin-dependent protein serine/threonine kinase activity	6/103	117/18903	4.34e-05	0.000189469	7.51e-05	AKT1/SRC/EGFR/CASP3/CCND1/CCNA2	6
BP	GO:0021782	glial cell development	6/103	117/18903	4.34e-05	0.000189469	7.51e-05	AKT1/TNF/IL6/TLR4/APP/NTRK2	6
BP	GO:1903034	regulation of response to wounding	7/103	172/18903	4.35e-05	0.000189785	7.53e-05	TNF/MTOR/FGF2/BRAF/ITGB1/NFE2L2/F2	7
BP	GO:0072331	signal transduction by p53 class mediator	7/103	173/18903	4.51e-05	0.000196702	7.8e-05	AKT1/BCL2/MTOR/SIRT1/EP300/MDM2/AURKA	7
BP	GO:1901800	positive regulation of proteasomal protein catabolic process	6/103	118/18903	4.55e-05	0.000198108	7.86e-05	AKT1/GSK3B/MDM2/NFE2L2/AURKA/VCP	6
BP	GO:0014743	regulation of muscle hypertrophy	5/103	72/18903	4.56e-05	0.000198534	7.87e-05	PPARG/PARP1/PPARA/PRKCA/G6PD	5
BP	GO:0002274	myeloid leukocyte activation	8/103	237/18903	4.63e-05	0.000201181	7.98e-05	TNF/IL6/JUN/TLR4/JAK2/APP/PTPRC/SNCA	8
BP	GO:0016358	dendrite development	8/103	237/18903	4.63e-05	0.000201181	7.98e-05	GSK3B/IL2/APP/CDC42/EZH2/ABL1/ITGB1/FYN	8
BP	GO:0021543	pallium development	7/103	174/18903	4.68e-05	0.000202953	8.05e-05	EGFR/CASP3/HIF1A/GSK3B/EZH2/HDAC1/NTRK2	7
BP	GO:0002068	glandular epithelial cell development	4/103	37/18903	4.78e-05	0.000206316	8.18e-05	AKT1/HIF1A/GSK3B/FASN	4
BP	GO:0007588	excretion	4/103	37/18903	4.78e-05	0.000206316	8.18e-05	ACE/AGTR1/ABCG2/DRD2	4
BP	GO:0071312	cellular response to alkaloid	4/103	37/18903	4.78e-05	0.000206316	8.18e-05	CASP3/BCL2L1/CCNA2/OPRM1	4
BP	GO:0071402	cellular response to lipoprotein particle stimulus	4/103	37/18903	4.78e-05	0.000206316	8.18e-05	AKT1/PPARG/TLR4/ITGB1	4
BP	GO:1902745	positive regulation of lamellipodium organization	4/103	37/18903	4.78e-05	0.000206316	8.18e-05	SRC/HSP90AA1/MTOR/CDC42	4
BP	GO:0002067	glandular epithelial cell differentiation	5/103	73/18903	4.88e-05	0.000209971	8.33e-05	AKT1/HIF1A/GSK3B/FGF2/FASN	5
BP	GO:0071677	positive regulation of mononuclear cell migration	5/103	73/18903	4.88e-05	0.000209971	8.33e-05	TNF/APP/ABL1/LGALS3/PTK2B	5
BP	GO:0002821	positive regulation of adaptive immune response	6/103	120/18903	5e-05	0.000214702	8.51e-05	TNF/IL6/SIRT1/JAK2/IL2/PTPRC	6
BP	GO:0007006	mitochondrial membrane organization	6/103	120/18903	5e-05	0.000214702	8.51e-05	HSP90AA1/BCL2/GSK3B/BCL2L1/MAPK8/SNCA	6
BP	GO:1902905	positive regulation of supramolecular fiber organization	7/103	176/18903	5.03e-05	0.00021592	8.56e-05	MTOR/GRB2/APP/CDC42/BRAF/ABL1/PTK2B	7
BP	GO:0033673	negative regulation of kinase activity	8/103	240/18903	5.06e-05	0.000217071	8.61e-05	AKT1/CASP3/PPARG/SIRT1/PTPRC/ABL1/HMGCR/SNCA	8
BP	GO:0051926	negative regulation of calcium ion transport	5/103	74/18903	5.21e-05	0.000223038	8.85e-05	BCL2/PTGS2/ACE/DRD2/CALM1	5
BP	GO:2001020	regulation of response to DNA damage stimulus	9/103	312/18903	5.22e-05	0.000223559	8.87e-05	EGFR/BCL2/SIRT1/MDM2/BCL2L1/PARP1/MCL1/ABL1/CASP9	9
BP	GO:0000077	DNA damage checkpoint signaling	6/103	121/18903	5.23e-05	0.000223734	8.87e-05	CCND1/MDM2/MAPK14/CDK2/PTPN11/CDK1	6
BP	GO:0001659	temperature homeostasis	7/103	178/18903	5.4e-05	0.00023049	9.14e-05	TNF/STAT3/PTGS2/TLR4/JAK2/DRD2/ADRB2	7
BP	GO:0006694	steroid biosynthetic process	7/103	178/18903	5.4e-05	0.00023049	9.14e-05	TNF/SIRT1/NR3C1/CYP3A4/HMGCR/CYP19A1/G6PD	7
BP	GO:0035791	platelet-derived growth factor receptor-beta signaling pathway	3/103	14/18903	5.47e-05	0.000232083	9.2e-05	SRC/ABL1/PDGFRB	3
BP	GO:0045348	positive regulation of MHC class II biosynthetic process	3/103	14/18903	5.47e-05	0.000232083	9.2e-05	TLR4/SIRT1/JAK2	3
BP	GO:0050966	detection of mechanical stimulus involved in sensory perception of pain	3/103	14/18903	5.47e-05	0.000232083	9.2e-05	TNF/FYN/NTRK1	3
BP	GO:0071236	cellular response to antibiotic	3/103	14/18903	5.47e-05	0.000232083	9.2e-05	MDM2/EZH2/HSPA5	3
BP	GO:0071871	response to epinephrine	3/103	14/18903	5.47e-05	0.000232083	9.2e-05	PRKACA/ABL1/SNCA	3
BP	GO:0043500	muscle adaptation	6/103	122/18903	5.48e-05	0.000232083	9.2e-05	PPARG/PARP1/EZH2/PPARA/PRKCA/G6PD	6
BP	GO:0071901	negative regulation of protein serine/threonine kinase activity	6/103	122/18903	5.48e-05	0.000232083	9.2e-05	AKT1/CASP3/PPARG/SIRT1/ABL1/HMGCR	6
BP	GO:0016239	positive regulation of macroautophagy	5/103	75/18903	5.56e-05	0.000234731	9.31e-05	HIF1A/MAPK3/SIRT1/KDR/ADRB2	5
BP	GO:0032890	regulation of organic acid transport	5/103	75/18903	5.56e-05	0.000234731	9.31e-05	AKT1/TNF/PPARA/ITGB1/SNCA	5
BP	GO:0046887	positive regulation of hormone secretion	6/103	123/18903	5.74e-05	0.000242162	9.6e-05	HIF1A/PPARG/JAK2/PTPN11/DRD2/CYP19A1	6
BP	GO:0008210	estrogen metabolic process	4/103	39/18903	5.91e-05	0.000247965	9.83e-05	CYP3A4/CYP19A1/CYP1A2/CYP2C9	4
BP	GO:0032373	positive regulation of sterol transport	4/103	39/18903	5.91e-05	0.000247965	9.83e-05	PPARG/SIRT1/NFKBIA/RXRA	4
BP	GO:0032376	positive regulation of cholesterol transport	4/103	39/18903	5.91e-05	0.000247965	9.83e-05	PPARG/SIRT1/NFKBIA/RXRA	4
BP	GO:0043618	regulation of transcription from RNA polymerase II promoter in response to stress	4/103	39/18903	5.91e-05	0.000247965	9.83e-05	JUN/HIF1A/HSPA5/NFE2L2	4
BP	GO:0044060	regulation of endocrine process	4/103	39/18903	5.91e-05	0.000247965	9.83e-05	PTPN11/REN/AGTR1/CYP19A1	4
BP	GO:0045685	regulation of glial cell differentiation	5/103	76/18903	5.92e-05	0.00024812	9.84e-05	IL6/MTOR/HDAC1/CDK1/F2	5
BP	GO:0060420	regulation of heart growth	5/103	76/18903	5.92e-05	0.00024812	9.84e-05	MAPK14/FGF2/PPARA/CDK1/G6PD	5
BP	GO:0055007	cardiac muscle cell differentiation	6/103	124/18903	6e-05	0.000251019	9.95e-05	MTOR/PPARA/ITGB1/PDGFRB/CDK1/G6PD	6
BP	GO:0072089	stem cell proliferation	6/103	124/18903	6e-05	0.000251019	9.95e-05	KDR/PTPRC/FGF2/ACE/TERT/ABCB1	6
BP	GO:0045930	negative regulation of mitotic cell cycle	8/103	246/18903	6.02e-05	0.000251612	9.98e-05	TNF/BCL2/CCND1/MDM2/EZH2/ABL1/CDK2/CDK1	8
BP	GO:0031330	negative regulation of cellular catabolic process	8/103	247/18903	6.2e-05	0.000258611	0.00010256	AKT1/STAT3/BCL2/HSP90AB1/MTOR/MAPK14/MCL1/SNCA	8
BP	GO:0042129	regulation of T cell proliferation	7/103	182/18903	6.22e-05	0.000259277	0.000102824	IL6/CASP3/ERBB2/JAK2/IL2/PTPRC/LGALS3	7
BP	GO:0001952	regulation of cell-matrix adhesion	6/103	125/18903	6.28e-05	0.000261448	0.000103685	SRC/BCL2/GSK3B/KDR/ABL1/PTK2B	6
BP	GO:0030968	endoplasmic reticulum unfolded protein response	5/103	77/18903	6.3e-05	0.000261518	0.000103713	CCND1/EP300/HSPA5/NFE2L2/VCP	5
BP	GO:0032729	positive regulation of interferon-gamma production	5/103	77/18903	6.3e-05	0.000261518	0.000103713	TNF/TLR4/JAK2/IL2/ABL1	5
BP	GO:0090559	regulation of membrane permeability	5/103	77/18903	6.3e-05	0.000261518	0.000103713	BCL2/MTOR/GSK3B/BCL2L1/MAPK8	5
BP	GO:1903036	positive regulation of response to wounding	5/103	77/18903	6.3e-05	0.000261518	0.000103713	MTOR/BRAF/ITGB1/NFE2L2/F2	5
BP	GO:0010762	regulation of fibroblast migration	4/103	40/18903	6.53e-05	0.000269911	0.000107041	AKT1/FGF2/BRAF/ITGB1	4
BP	GO:0010863	positive regulation of phospholipase C activity	4/103	40/18903	6.53e-05	0.000269911	0.000107041	EGFR/ESR1/FGF2/PDGFRB	4
BP	GO:0071392	cellular response to estradiol stimulus	4/103	40/18903	6.53e-05	0.000269911	0.000107041	EGFR/ESR1/CCNA2/ESR2	4
BP	GO:1902692	regulation of neuroblast proliferation	4/103	40/18903	6.53e-05	0.000269911	0.000107041	HIF1A/FGF2/ITGB1/DRD2	4
BP	GO:0006690	icosanoid metabolic process	6/103	126/18903	6.56e-05	0.000270825	0.000107404	PTGS2/SIRT1/CASP1/PTGS1/CYP1A2/CYP2C9	6
BP	GO:0032640	tumor necrosis factor production	7/103	184/18903	6.66e-05	0.000274404	0.000108823	IL6/STAT3/TLR4/JAK2/APP/PTPRC/PTPN11	7
BP	GO:0032680	regulation of tumor necrosis factor production	7/103	184/18903	6.66e-05	0.000274404	0.000108823	IL6/STAT3/TLR4/JAK2/APP/PTPRC/PTPN11	7
BP	GO:0048308	organelle inheritance	3/103	15/18903	6.82e-05	0.000279593	0.000110881	MAPK3/MAPK1/CDK1	3
BP	GO:0048313	Golgi inheritance	3/103	15/18903	6.82e-05	0.000279593	0.000110881	MAPK3/MAPK1/CDK1	3
BP	GO:0061307	cardiac neural crest cell differentiation involved in heart development	3/103	15/18903	6.82e-05	0.000279593	0.000110881	MAPK3/MAPK1/CDC42	3
BP	GO:0061308	cardiac neural crest cell development involved in heart development	3/103	15/18903	6.82e-05	0.000279593	0.000110881	MAPK3/MAPK1/CDC42	3
BP	GO:0010951	negative regulation of endopeptidase activity	8/103	252/18903	7.13e-05	0.000291592	0.000115639	GAPDH/AKT1/TNF/SRC/PTGS2/MMP9/APP/SNCA	8
BP	GO:0050851	antigen receptor-mediated signaling pathway	8/103	252/18903	7.13e-05	0.000291592	0.000115639	BCL2/MAPK1/RELA/PTPRC/BRAF/ABL1/FYN/LGALS3	8
BP	GO:0002437	inflammatory response to antigenic stimulus	5/103	79/18903	7.13e-05	0.000291592	0.000115639	TNF/SRC/MAPK14/FYN/OPRM1	5
BP	GO:0030218	erythrocyte differentiation	6/103	128/18903	7.16e-05	0.000292663	0.000116064	STAT3/CASP3/HIF1A/JAK2/MAPK14/G6PD	6
BP	GO:0046688	response to copper ion	4/103	41/18903	7.21e-05	0.000293963	0.00011658	APP/NFE2L2/CDK1/SNCA	4
BP	GO:0051281	positive regulation of release of sequestered calcium ion into cytosol	4/103	41/18903	7.21e-05	0.000293963	0.00011658	ABL1/SNCA/CALM1/F2	4
BP	GO:0002221	pattern recognition receptor signaling pathway	7/103	187/18903	7.38e-05	0.000300462	0.000119157	TNF/ESR1/TLR4/RELA/NFKBIA/CASP1/CTSS	7
BP	GO:0031570	DNA integrity checkpoint signaling	6/103	129/18903	7.48e-05	0.000304375	0.000120709	CCND1/MDM2/MAPK14/CDK2/PTPN11/CDK1	6
BP	GO:0070227	lymphocyte apoptotic process	5/103	80/18903	7.57e-05	0.000307839	0.000122083	AKT1/BCL2/HIF1A/IL2/LGALS3	5
BP	GO:0002833	positive regulation of response to biotic stimulus	7/103	188/18903	7.63e-05	0.000309772	0.000122849	SRC/HSP90AA1/TLR4/EP300/CREBBP/PRKCA/FYN	7
BP	GO:0021537	telencephalon development	8/103	255/18903	7.74e-05	0.000314171	0.000124594	EGFR/CASP3/HIF1A/GSK3B/EZH2/HDAC1/NTRK2/DRD2	8
BP	GO:0071706	tumor necrosis factor superfamily cytokine production	7/103	189/18903	7.89e-05	0.000319308	0.000126631	IL6/STAT3/TLR4/JAK2/APP/PTPRC/PTPN11	7
BP	GO:1903555	regulation of tumor necrosis factor superfamily cytokine production	7/103	189/18903	7.89e-05	0.000319308	0.000126631	IL6/STAT3/TLR4/JAK2/APP/PTPRC/PTPN11	7
BP	GO:0010907	positive regulation of glucose metabolic process	4/103	42/18903	7.94e-05	0.000320342	0.000127041	AKT1/SRC/SIRT1/PPARA	4
BP	GO:0014002	astrocyte development	4/103	42/18903	7.94e-05	0.000320342	0.000127041	TNF/IL6/TLR4/APP	4
BP	GO:0043029	T cell homeostasis	4/103	42/18903	7.94e-05	0.000320342	0.000127041	AKT1/BCL2/CASP3/IL2	4
BP	GO:0034349	glial cell apoptotic process	3/103	16/18903	8.36e-05	0.000335979	0.000133243	CASP3/CASP9/PRKCA	3
BP	GO:0048266	behavioral response to pain	3/103	16/18903	8.36e-05	0.000335979	0.000133243	AKT1/MTOR/NTRK1	3
BP	GO:0070431	nucleotide-binding oligomerization domain containing 2 signaling pathway	3/103	16/18903	8.36e-05	0.000335979	0.000133243	TLR4/RELA/NFKBIA	3
BP	GO:2000846	regulation of corticosteroid hormone secretion	3/103	16/18903	8.36e-05	0.000335979	0.000133243	PTPN11/REN/AGTR1	3
BP	GO:0055001	muscle cell development	7/103	191/18903	8.42e-05	0.000338405	0.000134205	BCL2/MTOR/PPARA/ITGB1/PDGFRB/CDK1/G6PD	7
BP	GO:0042509	regulation of tyrosine phosphorylation of STAT protein	5/103	82/18903	8.52e-05	0.000341624	0.000135481	TNF/IL6/JAK2/IL2/FYN	5
BP	GO:0051149	positive regulation of muscle cell differentiation	5/103	82/18903	8.52e-05	0.000341624	0.000135481	BCL2/MTOR/SIRT1/MDM2/MAPK14	5
BP	GO:0015980	energy derivation by oxidation of organic compounds	9/103	333/18903	8.61e-05	0.000344845	0.000136759	AKT1/TNF/HIF1A/MTOR/GSK3B/CDK1/SNCA/VCP/CYP1A2	9
BP	GO:0071364	cellular response to epidermal growth factor stimulus	4/103	43/18903	8.71e-05	0.000347928	0.000137981	AKT1/EGFR/ERBB2/PTPN11	4
BP	GO:0071548	response to dexamethasone	4/103	43/18903	8.71e-05	0.000347928	0.000137981	JAK2/CASP9/ACE/NR3C1	4
BP	GO:1900371	regulation of purine nucleotide biosynthetic process	4/103	43/18903	8.71e-05	0.000347928	0.000137981	PARP1/PPARA/SNCA/VCP	4
BP	GO:0050848	regulation of calcium-mediated signaling	5/103	83/18903	9.03e-05	0.000359483	0.000142564	TNF/MTOR/GSK3B/PTK2B/CALM1	5
BP	GO:0055013	cardiac muscle cell development	5/103	83/18903	9.03e-05	0.000359483	0.000142564	MTOR/PPARA/PDGFRB/CDK1/G6PD	5
BP	GO:0061515	myeloid cell development	5/103	83/18903	9.03e-05	0.000359483	0.000142564	SRC/EP300/APP/PTPN11/G6PD	5
BP	GO:0030808	regulation of nucleotide biosynthetic process	4/103	44/18903	9.54e-05	0.000378373	0.000150055	PARP1/PPARA/SNCA/VCP	4
BP	GO:0072538	T-helper 17 type immune response	4/103	44/18903	9.54e-05	0.000378373	0.000150055	IL6/STAT3/JAK2/IL2	4
BP	GO:0098815	modulation of excitatory postsynaptic potential	4/103	44/18903	9.54e-05	0.000378373	0.000150055	APP/GRIN2B/PTK2B/ADRB2	4
BP	GO:1905521	regulation of macrophage migration	4/103	44/18903	9.54e-05	0.000378373	0.000150055	MAPK3/MAPK1/CYP19A1/PTK2B	4
BP	GO:0051851	modulation by host of symbiont process	5/103	84/18903	9.56e-05	0.000378373	0.000150055	JUN/EP300/CDC42/HDAC1/FASN	5
BP	GO:0051899	membrane depolarization	5/103	84/18903	9.56e-05	0.000378373	0.000150055	SRC/BCL2/KDR/PARP1/ABL1	5
BP	GO:0010565	regulation of cellular ketone metabolic process	6/103	136/18903	0.000100224	0.000396319	0.000157172	AKT1/PPARG/PTGS2/SIRT1/PPARA/SNCA	6
BP	GO:0009404	toxin metabolic process	3/103	17/18903	0.000101066	0.000397973	0.000157828	NFE2L2/CYP3A4/CYP1A2	3
BP	GO:0031649	heat generation	3/103	17/18903	0.000101066	0.000397973	0.000157828	TNF/PTGS2/ADRB2	3
BP	GO:0090594	inflammatory response to wounding	3/103	17/18903	0.000101066	0.000397973	0.000157828	HIF1A/PPARG/TLR4	3
BP	GO:0034103	regulation of tissue remodeling	5/103	85/18903	0.000101131	0.000397973	0.000157828	IL6/SRC/PPARG/IL2/PRKCA	5
BP	GO:0048041	focal adhesion assembly	5/103	85/18903	0.000101131	0.000397973	0.000157828	SRC/BCL2/KDR/ABL1/PTK2B	5
BP	GO:0003254	regulation of membrane depolarization	4/103	45/18903	0.00010432	0.000407903	0.000161766	SRC/BCL2/KDR/PARP1	4
BP	GO:0010712	regulation of collagen metabolic process	4/103	45/18903	0.00010432	0.000407903	0.000161766	IL6/ITGB1/PDGFRB/F2	4
BP	GO:0030574	collagen catabolic process	4/103	45/18903	0.00010432	0.000407903	0.000161766	MMP9/ITGB1/CTSB/CTSS	4
BP	GO:0030890	positive regulation of B cell proliferation	4/103	45/18903	0.00010432	0.000407903	0.000161766	BCL2/TLR4/IL2/PTPRC	4
BP	GO:0031295	T cell costimulation	4/103	45/18903	0.00010432	0.000407903	0.000161766	AKT1/SRC/PTPN11/FYN	4
BP	GO:0034101	erythrocyte homeostasis	6/103	137/18903	0.000104357	0.000407903	0.000161766	STAT3/CASP3/HIF1A/JAK2/MAPK14/G6PD	6
BP	GO:0061041	regulation of wound healing	6/103	137/18903	0.000104357	0.000407903	0.000161766	TNF/MTOR/FGF2/ITGB1/NFE2L2/F2	6
BP	GO:0007260	tyrosine phosphorylation of STAT protein	5/103	86/18903	0.000106913	0.000417095	0.000165411	TNF/IL6/JAK2/IL2/FYN	5
BP	GO:0033077	T cell differentiation in thymus	5/103	86/18903	0.000106913	0.000417095	0.000165411	BCL2/ERBB2/PTPRC/BRAF/ABL1	5
BP	GO:0009746	response to hexose	7/103	199/18903	0.00010886	0.000424284	0.000168262	TNF/CASP3/HIF1A/PTGS2/PRKACA/ACE/PTK2B	7
BP	GO:0010660	regulation of muscle cell apoptotic process	5/103	87/18903	0.000112945	0.000438845	0.000174037	PPARG/SIRT1/JAK2/NFE2L2/PTK2B	5
BP	GO:2000134	negative regulation of G1/S transition of mitotic cell cycle	5/103	87/18903	0.000112945	0.000438845	0.000174037	BCL2/CCND1/MDM2/EZH2/CDK2	5
BP	GO:0008203	cholesterol metabolic process	6/103	139/18903	0.000113028	0.000438845	0.000174037	APP/CYP3A4/HMGCR/CYP1A2/G6PD/CYP2C9	6
BP	GO:0008277	regulation of G protein-coupled receptor signaling pathway	6/103	139/18903	0.000113028	0.000438845	0.000174037	PRKCA/SNCA/DRD2/ADRB2/OPRM1/F2	6
BP	GO:0010677	negative regulation of cellular carbohydrate metabolic process	4/103	46/18903	0.00011378	0.000440085	0.000174529	STAT3/GSK3B/EP300/PPARA	4
BP	GO:0048806	genitalia development	4/103	46/18903	0.00011378	0.000440085	0.000174529	ESR1/AR/PTPN11/CYP19A1	4
BP	GO:0060443	mammary gland morphogenesis	4/103	46/18903	0.00011378	0.000440085	0.000174529	SRC/ESR1/AR/NR3C1	4
BP	GO:1900271	regulation of long-term synaptic potentiation	4/103	46/18903	0.00011378	0.000440085	0.000174529	GSK3B/APP/ABL1/DRD2	4
BP	GO:0032370	positive regulation of lipid transport	5/103	88/18903	0.000119235	0.000459876	0.000182378	PPARG/SIRT1/NFKBIA/CYP19A1/RXRA	5
BP	GO:0043367	CD4-positive, alpha-beta T cell differentiation	5/103	88/18903	0.000119235	0.000459876	0.000182378	IL6/STAT3/MTOR/IL2/BRAF	5
BP	GO:0046889	positive regulation of lipid biosynthetic process	5/103	88/18903	0.000119235	0.000459876	0.000182378	AKT1/TNF/PTGS2/MTOR/PPARA	5
BP	GO:0002295	T-helper cell lineage commitment	3/103	18/18903	0.000120799	0.000461099	0.000182863	IL6/STAT3/MTOR	3
BP	GO:0030730	sequestering of triglyceride	3/103	18/18903	0.000120799	0.000461099	0.000182863	TNF/PPARG/PPARA	3
BP	GO:0038128	ERBB2 signaling pathway	3/103	18/18903	0.000120799	0.000461099	0.000182863	SRC/EGFR/ERBB2	3
BP	GO:0042402	cellular biogenic amine catabolic process	3/103	18/18903	0.000120799	0.000461099	0.000182863	MAOA/MAOB/COMT	3
BP	GO:0044320	cellular response to leptin stimulus	3/103	18/18903	0.000120799	0.000461099	0.000182863	STAT3/SIRT1/CCNA2	3
BP	GO:0050665	hydrogen peroxide biosynthetic process	3/103	18/18903	0.000120799	0.000461099	0.000182863	FYN/MAOB/CYP1A2	3
BP	GO:0051580	regulation of neurotransmitter uptake	3/103	18/18903	0.000120799	0.000461099	0.000182863	ITGB1/SNCA/DRD2	3
BP	GO:0051770	positive regulation of nitric-oxide synthase biosynthetic process	3/103	18/18903	0.000120799	0.000461099	0.000182863	TLR4/JAK2/KDR	3
BP	GO:0060391	positive regulation of SMAD protein signal transduction	3/103	18/18903	0.000120799	0.000461099	0.000182863	PPARG/JAK2/PARP1	3
BP	GO:0060644	mammary gland epithelial cell differentiation	3/103	18/18903	0.000120799	0.000461099	0.000182863	AKT1/HIF1A/FGF2	3
BP	GO:2000641	regulation of early endosome to late endosome transport	3/103	18/18903	0.000120799	0.000461099	0.000182863	SRC/MAPK3/MAPK1	3
BP	GO:1901988	negative regulation of cell cycle phase transition	8/103	272/18903	0.000121146	0.00046199	0.000183216	BCL2/CCND1/MDM2/MAPK14/EZH2/CDK2/PTPN11/CDK1	8
BP	GO:0002861	regulation of inflammatory response to antigenic stimulus	4/103	47/18903	0.000123845	0.000470081	0.000186425	TNF/SRC/MAPK14/FYN	4
BP	GO:0030521	androgen receptor signaling pathway	4/103	47/18903	0.000123845	0.000470081	0.000186425	SIRT1/EP300/HDAC1/AR	4
BP	GO:0031294	lymphocyte costimulation	4/103	47/18903	0.000123845	0.000470081	0.000186425	AKT1/SRC/PTPN11/FYN	4
BP	GO:0060711	labyrinthine layer development	4/103	47/18903	0.000123845	0.000470081	0.000186425	AKT1/MAPK1/GRB2/CASP8	4
BP	GO:0071470	cellular response to osmotic stress	4/103	47/18903	0.000123845	0.000470081	0.000186425	CASP3/PTGS2/MTOR/CASP1	4
BP	GO:0046849	bone remodeling	5/103	89/18903	0.000125791	0.00047702	0.000189177	IL6/SRC/PRKCA/PTK2B/ADRB2	5
BP	GO:0046165	alcohol biosynthetic process	6/103	143/18903	0.000132085	0.000500421	0.000198457	FGF2/CYP3A4/HMGCR/SNCA/PTK2B/G6PD	6
BP	GO:0046364	monosaccharide biosynthetic process	5/103	90/18903	0.000132619	0.00050151	0.000198889	SIRT1/EP300/PPARA/NR3C1/G6PD	5
BP	GO:0055006	cardiac cell development	5/103	90/18903	0.000132619	0.00050151	0.000198889	MTOR/PPARA/PDGFRB/CDK1/G6PD	5
BP	GO:0006953	acute-phase response	4/103	48/18903	0.000134541	0.000506428	0.000200839	TNF/IL6/PTGS2/F2	4
BP	GO:0032620	interleukin-17 production	4/103	48/18903	0.000134541	0.000506428	0.000200839	IL6/TLR4/JAK2/IL2	4
BP	GO:0032660	regulation of interleukin-17 production	4/103	48/18903	0.000134541	0.000506428	0.000200839	IL6/TLR4/JAK2/IL2	4
BP	GO:0045776	negative regulation of blood pressure	4/103	48/18903	0.000134541	0.000506428	0.000200839	TNF/PPARA/DRD2/ADRB2	4
BP	GO:1902003	regulation of amyloid-beta formation	4/103	48/18903	0.000134541	0.000506428	0.000200839	TNF/CASP3/RELA/NTRK2	4
BP	GO:0010508	positive regulation of autophagy	6/103	144/18903	0.000137225	0.000515577	0.000204468	HIF1A/MAPK3/GSK3B/SIRT1/KDR/ADRB2	6
BP	GO:0030177	positive regulation of Wnt signaling pathway	6/103	144/18903	0.000137225	0.000515577	0.000204468	SRC/EGFR/FGF2/ABL1/TERT/VCP	6
BP	GO:0034284	response to monosaccharide	7/103	207/18903	0.000139032	0.000521883	0.000206968	TNF/CASP3/HIF1A/PTGS2/PRKACA/ACE/PTK2B	7
BP	GO:0001942	hair follicle development	5/103	91/18903	0.000139727	0.000523044	0.000207429	TNF/EGFR/BCL2/RELA/HDAC1	5
BP	GO:0106027	neuron projection organization	5/103	91/18903	0.000139727	0.000523044	0.000207429	GSK3B/APP/CDC42/FYN/GRIN2B	5
BP	GO:1903351	cellular response to dopamine	5/103	91/18903	0.000139727	0.000523044	0.000207429	MAPK3/GSK3B/MAPK1/ABL1/DRD2	5
BP	GO:1903532	positive regulation of secretion by cell	8/103	278/18903	0.000140759	0.000526424	0.000208769	HIF1A/PPARG/TLR4/JAK2/PTPN11/SNCA/DRD2/CYP19A1	8
BP	GO:0045089	positive regulation of innate immune response	6/103	145/18903	0.000142524	0.000530462	0.00021037	SRC/HSP90AA1/TLR4/EP300/CREBBP/FYN	6
BP	GO:0035813	regulation of renal sodium excretion	3/103	19/18903	0.000142882	0.000530462	0.00021037	ACE/AGTR1/DRD2	3
BP	GO:0035930	corticosteroid hormone secretion	3/103	19/18903	0.000142882	0.000530462	0.00021037	PTPN11/REN/AGTR1	3
BP	GO:0036003	positive regulation of transcription from RNA polymerase II promoter in response to stress	3/103	19/18903	0.000142882	0.000530462	0.00021037	HIF1A/HSPA5/NFE2L2	3
BP	GO:0045346	regulation of MHC class II biosynthetic process	3/103	19/18903	0.000142882	0.000530462	0.00021037	TLR4/SIRT1/JAK2	3
BP	GO:0060977	coronary vasculature morphogenesis	3/103	19/18903	0.000142882	0.000530462	0.00021037	FGF2/ACE/PDGFRB	3
BP	GO:0070989	oxidative demethylation	3/103	19/18903	0.000142882	0.000530462	0.00021037	CYP3A4/CYP1A2/CYP2C9	3
BP	GO:1902894	negative regulation of miRNA transcription	3/103	19/18903	0.000142882	0.000530462	0.00021037	PPARG/RELA/PPARA	3
BP	GO:0003044	regulation of systemic arterial blood pressure mediated by a chemical signal	4/103	49/18903	0.00014589	0.000538682	0.00021363	ACE/REN/AGTR1/ADRB2	4
BP	GO:0031281	positive regulation of cyclase activity	4/103	49/18903	0.00014589	0.000538682	0.00021363	MAPK3/MAPK14/MAPK8/ADRB2	4
BP	GO:0034198	cellular response to amino acid starvation	4/103	49/18903	0.00014589	0.000538682	0.00021363	MAPK3/MTOR/MAPK1/MAPK8	4
BP	GO:0043457	regulation of cellular respiration	4/103	49/18903	0.00014589	0.000538682	0.00021363	TNF/HIF1A/SNCA/VCP	4
BP	GO:0050798	activated T cell proliferation	4/103	49/18903	0.00014589	0.000538682	0.00021363	CASP3/IL2/ABL1/FYN	4
BP	GO:1903426	regulation of reactive oxygen species biosynthetic process	4/103	49/18903	0.00014589	0.000538682	0.00021363	TLR4/PPARA/FYN/SNCA	4
BP	GO:0072091	regulation of stem cell proliferation	5/103	92/18903	0.000147123	0.00054176	0.000214851	KDR/PTPRC/FGF2/ACE/TERT	5
BP	GO:0097581	lamellipodium organization	5/103	92/18903	0.000147123	0.00054176	0.000214851	SRC/HSP90AA1/MTOR/CDC42/ITGB1	5
BP	GO:1903350	response to dopamine	5/103	92/18903	0.000147123	0.00054176	0.000214851	MAPK3/GSK3B/MAPK1/ABL1/DRD2	5
BP	GO:0031333	negative regulation of protein-containing complex assembly	6/103	146/18903	0.000147982	0.000543939	0.000215715	SRC/GSK3B/EP300/CDC42/HSPA5/SNCA	6
BP	GO:0050671	positive regulation of lymphocyte proliferation	6/103	146/18903	0.000147982	0.000543939	0.000215715	IL6/BCL2/TLR4/JAK2/IL2/PTPRC	6
BP	GO:0035296	regulation of tube diameter	6/103	147/18903	0.000153606	0.000562576	0.000223106	TNF/PTGS2/ABL1/ACE/AGTR1/ADRB2	6
BP	GO:0051592	response to calcium ion	6/103	147/18903	0.000153606	0.000562576	0.000223106	JUN/CCND1/BRAF/HSPA5/PTK2B/CALM1	6
BP	GO:0097746	blood vessel diameter maintenance	6/103	147/18903	0.000153606	0.000562576	0.000223106	TNF/PTGS2/ABL1/ACE/AGTR1/ADRB2	6
BP	GO:1903038	negative regulation of leukocyte cell-cell adhesion	6/103	147/18903	0.000153606	0.000562576	0.000223106	AKT1/CASP3/ERBB2/IL2/PPARA/LGALS3	6
BP	GO:1904427	positive regulation of calcium ion transmembrane transport	5/103	93/18903	0.000154816	0.000566497	0.000224661	ABL1/SNCA/G6PD/CALM1/F2	5
BP	GO:0045737	positive regulation of cyclin-dependent protein serine/threonine kinase activity	4/103	50/18903	0.000157916	0.000577322	0.000228954	AKT1/SRC/EGFR/CCND1	4
BP	GO:0035150	regulation of tube size	6/103	148/18903	0.000159397	0.000582214	0.000230895	TNF/PTGS2/ABL1/ACE/AGTR1/ADRB2	6
BP	GO:0008544	epidermis development	9/103	362/18903	0.000161733	0.000590218	0.000234069	TNF/EGFR/BCL2/CASP3/RELA/FGF2/EZH2/HDAC1/PPARA	9
BP	GO:0022404	molting cycle process	5/103	94/18903	0.000162812	0.00059309	0.000235208	TNF/EGFR/BCL2/RELA/HDAC1	5
BP	GO:0022405	hair cycle process	5/103	94/18903	0.000162812	0.00059309	0.000235208	TNF/EGFR/BCL2/RELA/HDAC1	5
BP	GO:0050796	regulation of insulin secretion	6/103	149/18903	0.00016536	0.000601295	0.000238462	TNF/IL6/HIF1A/JAK2/PTPN11/DRD2	6
BP	GO:1902652	secondary alcohol metabolic process	6/103	149/18903	0.00016536	0.000601295	0.000238462	APP/CYP3A4/HMGCR/CYP1A2/G6PD/CYP2C9	6
BP	GO:0009310	amine catabolic process	3/103	20/18903	0.000167432	0.000603971	0.000239523	MAOA/MAOB/COMT	3
BP	GO:0014856	skeletal muscle cell proliferation	3/103	20/18903	0.000167432	0.000603971	0.000239523	SRC/JAK2/FGF2	3
BP	GO:0032495	response to muramyl dipeptide	3/103	20/18903	0.000167432	0.000603971	0.000239523	RELA/NFKBIA/MAPK14	3
BP	GO:0045342	MHC class II biosynthetic process	3/103	20/18903	0.000167432	0.000603971	0.000239523	TLR4/SIRT1/JAK2	3
BP	GO:1900221	regulation of amyloid-beta clearance	3/103	20/18903	0.000167432	0.000603971	0.000239523	TNF/HDAC1/HMGCR	3
BP	GO:1902004	positive regulation of amyloid-beta formation	3/103	20/18903	0.000167432	0.000603971	0.000239523	TNF/CASP3/RELA	3
BP	GO:1903579	negative regulation of ATP metabolic process	3/103	20/18903	0.000167432	0.000603971	0.000239523	STAT3/PARP1/PPARA	3
BP	GO:2000010	positive regulation of protein localization to cell surface	3/103	20/18903	0.000167432	0.000603971	0.000239523	AKT1/TNF/HSP90AB1	3
BP	GO:2000629	negative regulation of miRNA metabolic process	3/103	20/18903	0.000167432	0.000603971	0.000239523	PPARG/RELA/PPARA	3
BP	GO:0048568	embryonic organ development	10/103	449/18903	0.000170148	0.000612835	0.000243038	AKT1/TNF/EGFR/HIF1A/MAPK3/MAPK1/KDR/GRB2/CDC42/CASP8	10
BP	GO:0050873	brown fat cell differentiation	4/103	51/18903	0.000170642	0.000612835	0.000243038	PTGS2/SIRT1/MAPK14/ADRB2	4
BP	GO:0060425	lung morphogenesis	4/103	51/18903	0.000170642	0.000612835	0.000243038	TNF/MAPK3/MAPK1/CDC42	4
BP	GO:0060688	regulation of morphogenesis of a branching structure	4/103	51/18903	0.000170642	0.000612835	0.000243038	TNF/ESR1/ABL1/AR	4
BP	GO:1990928	response to amino acid starvation	4/103	51/18903	0.000170642	0.000612835	0.000243038	MAPK3/MTOR/MAPK1/MAPK8	4
BP	GO:0007044	cell-substrate junction assembly	5/103	95/18903	0.00017112	0.000612928	0.000243075	SRC/BCL2/KDR/ABL1/PTK2B	5
BP	GO:0032465	regulation of cytokinesis	5/103	95/18903	0.00017112	0.000612928	0.000243075	BCL2L1/CDC42/AURKA/DRD2/CALM1	5
BP	GO:0098773	skin epidermis development	5/103	95/18903	0.00017112	0.000612928	0.000243075	TNF/EGFR/BCL2/RELA/HDAC1	5
BP	GO:0043161	proteasome-mediated ubiquitin-dependent protein catabolic process	10/103	450/18903	0.000173235	0.00061996	0.000245864	AKT1/HSP90AB1/GSK3B/SIRT1/MDM2/CDK2/HSPA5/NFE2L2/AURKA/VCP	10
BP	GO:0006066	alcohol metabolic process	9/103	367/18903	0.000179179	0.000640667	0.000254076	APP/FGF2/CYP3A4/HMGCR/SNCA/PTK2B/CYP1A2/G6PD/CYP2C9	9
BP	GO:0061097	regulation of protein tyrosine kinase activity	5/103	96/18903	0.000179748	0.000642137	0.000254659	SRC/EGFR/APP/PTPRC/ACE	5
BP	GO:0007215	glutamate receptor signaling pathway	4/103	52/18903	0.000184092	0.000655356	0.000259901	APP/FYN/GRIN2B/PTK2B	4
BP	GO:0045912	negative regulation of carbohydrate metabolic process	4/103	52/18903	0.000184092	0.000655356	0.000259901	STAT3/GSK3B/EP300/PPARA	4
BP	GO:0046622	positive regulation of organ growth	4/103	52/18903	0.000184092	0.000655356	0.000259901	AKT1/MAPK14/FGF2/CDK1	4
BP	GO:0051496	positive regulation of stress fiber assembly	4/103	52/18903	0.000184092	0.000655356	0.000259901	MTOR/CDC42/BRAF/ABL1	4
BP	GO:0046942	carboxylic acid transport	8/103	290/18903	0.000187891	0.000668294	0.000265032	TNF/PTGS2/ITGB1/ACE/SNCA/ABCG2/NTRK2/DRD2	8
BP	GO:0006576	cellular biogenic amine metabolic process	5/103	97/18903	0.000188704	0.000670015	0.000265714	SNCA/MAOA/DRD2/MAOB/COMT	5
BP	GO:0043502	regulation of muscle adaptation	5/103	97/18903	0.000188704	0.000670015	0.000265714	PPARG/PARP1/PPARA/PRKCA/G6PD	5
BP	GO:0042180	cellular ketone metabolic process	7/103	218/18903	0.000191267	0.000677932	0.000268854	AKT1/PPARG/PTGS2/SIRT1/PPARA/SNCA/CYP19A1	7
BP	GO:0072330	monocarboxylic acid biosynthetic process	7/103	218/18903	0.000191267	0.000677932	0.000268854	PTGS2/SIRT1/CYP3A4/FASN/PTGS1/CYP1A2/CYP2C9	7
BP	GO:0007252	I-kappaB phosphorylation	3/103	21/18903	0.000194565	0.000687225	0.00027254	AKT1/TNF/TLR4	3
BP	GO:0035812	renal sodium excretion	3/103	21/18903	0.000194565	0.000687225	0.00027254	ACE/AGTR1/DRD2	3
BP	GO:0043373	CD4-positive, alpha-beta T cell lineage commitment	3/103	21/18903	0.000194565	0.000687225	0.00027254	IL6/STAT3/MTOR	3
BP	GO:0045821	positive regulation of glycolytic process	3/103	21/18903	0.000194565	0.000687225	0.00027254	HIF1A/MTOR/APP	3
BP	GO:0050905	neuromuscular process	6/103	154/18903	0.000197875	0.000697361	0.000276559	TNF/HSP90AA1/MTOR/APP/ABL1/DRD2	6
BP	GO:0032642	regulation of chemokine production	5/103	98/18903	0.000197997	0.000697361	0.000276559	TNF/IL6/HIF1A/TLR4/APP	5
BP	GO:1902807	negative regulation of cell cycle G1/S phase transition	5/103	98/18903	0.000197997	0.000697361	0.000276559	BCL2/CCND1/MDM2/EZH2/CDK2	5
BP	GO:0006111	regulation of gluconeogenesis	4/103	53/18903	0.000198291	0.000697361	0.000276559	SIRT1/EP300/PPARA/NR3C1	4
BP	GO:0010874	regulation of cholesterol efflux	4/103	53/18903	0.000198291	0.000697361	0.000276559	PPARG/SIRT1/NFKBIA/RXRA	4
BP	GO:0030512	negative regulation of transforming growth factor beta receptor signaling pathway	5/103	99/18903	0.000207635	0.00072896	0.000289091	PPARG/SIRT1/HDAC1/PPARA/HSPA5	5
BP	GO:0032602	chemokine production	5/103	99/18903	0.000207635	0.00072896	0.000289091	TNF/IL6/HIF1A/TLR4/APP	5
BP	GO:0043583	ear development	7/103	221/18903	0.000207972	0.000729514	0.000289311	BCL2/MAPK3/MAPK1/FGF2/PTPN11/PDGFRB/CCNA2	7
BP	GO:0030857	negative regulation of epithelial cell differentiation	4/103	54/18903	0.000213263	0.000745504	0.000295652	MMP9/CCND1/EZH2/XDH	4
BP	GO:0042149	cellular response to glucose starvation	4/103	54/18903	0.000213263	0.000745504	0.000295652	BCL2/SIRT1/HSPA5/NFE2L2	4
BP	GO:0045744	negative regulation of G protein-coupled receptor signaling pathway	4/103	54/18903	0.000213263	0.000745504	0.000295652	SNCA/DRD2/ADRB2/OPRM1	4
BP	GO:1902743	regulation of lamellipodium organization	4/103	54/18903	0.000213263	0.000745504	0.000295652	SRC/HSP90AA1/MTOR/CDC42	4
BP	GO:0042886	amide transport	8/103	296/18903	0.000215925	0.000754162	0.000299086	TNF/IL6/HIF1A/JAK2/PTPN11/ABCB1/ABCG2/DRD2	8
BP	GO:0030316	osteoclast differentiation	5/103	100/18903	0.000217626	0.00075815	0.000300667	TNF/SRC/MTOR/TLR4/MAPK14	5
BP	GO:0034620	cellular response to unfolded protein	5/103	100/18903	0.000217626	0.00075815	0.000300667	CCND1/EP300/HSPA5/NFE2L2/VCP	5
BP	GO:0098869	cellular oxidant detoxification	5/103	100/18903	0.000217626	0.00075815	0.000300667	PTGS2/NFE2L2/MPO/PTGS1/GSR	5
BP	GO:0010042	response to manganese ion	3/103	22/18903	0.000224395	0.000776414	0.00030791	PTGS2/APP/HSPA5	3
BP	GO:0035584	calcium-mediated signaling using intracellular calcium source	3/103	22/18903	0.000224395	0.000776414	0.00030791	KDR/PTPRC/PRKACA	3
BP	GO:0044062	regulation of excretion	3/103	22/18903	0.000224395	0.000776414	0.00030791	ACE/AGTR1/DRD2	3
BP	GO:0046628	positive regulation of insulin receptor signaling pathway	3/103	22/18903	0.000224395	0.000776414	0.00030791	SRC/SIRT1/PTPN11	3
BP	GO:0051767	nitric-oxide synthase biosynthetic process	3/103	22/18903	0.000224395	0.000776414	0.00030791	TLR4/JAK2/KDR	3
BP	GO:0051769	regulation of nitric-oxide synthase biosynthetic process	3/103	22/18903	0.000224395	0.000776414	0.00030791	TLR4/JAK2/KDR	3
BP	GO:0060065	uterus development	3/103	22/18903	0.000224395	0.000776414	0.00030791	SRC/ESR1/CYP19A1	3
BP	GO:2000310	regulation of NMDA receptor activity	3/103	22/18903	0.000224395	0.000776414	0.00030791	APP/PTK2B/OPRM1	3
BP	GO:0044409	entry into host	6/103	158/18903	0.000227356	0.000785323	0.000311443	SRC/EGFR/ITGB1/CDK1/CTSB/AGTR1	6
BP	GO:0090101	negative regulation of transmembrane receptor protein serine/threonine kinase signaling pathway	6/103	158/18903	0.000227356	0.000785323	0.000311443	PPARG/SIRT1/HDAC1/ABL1/PPARA/HSPA5	6
BP	GO:0015908	fatty acid transport	5/103	101/18903	0.000227979	0.000785778	0.000311624	AKT1/PPARG/PPARA/ACE/DRD2	5
BP	GO:0150115	cell-substrate junction organization	5/103	101/18903	0.000227979	0.000785778	0.000311624	SRC/BCL2/KDR/ABL1/PTK2B	5
BP	GO:0010761	fibroblast migration	4/103	55/18903	0.000229032	0.000785778	0.000311624	AKT1/FGF2/BRAF/ITGB1	4
BP	GO:0031103	axon regeneration	4/103	55/18903	0.000229032	0.000785778	0.000311624	BCL2/JUN/JAK2/BRAF	4
BP	GO:1902991	regulation of amyloid precursor protein catabolic process	4/103	55/18903	0.000229032	0.000785778	0.000311624	TNF/CASP3/RELA/NTRK2	4
BP	GO:2000107	negative regulation of leukocyte apoptotic process	4/103	55/18903	0.000229032	0.000785778	0.000311624	BCL2/HIF1A/BCL2L1/IL2	4
BP	GO:2000179	positive regulation of neural precursor cell proliferation	4/103	55/18903	0.000229032	0.000785778	0.000311624	HIF1A/FGF2/ITGB1/DRD2	4
BP	GO:2000648	positive regulation of stem cell proliferation	4/103	55/18903	0.000229032	0.000785778	0.000311624	KDR/PTPRC/FGF2/TERT	4
BP	GO:0007292	female gamete generation	6/103	159/18903	0.00023524	0.000805718	0.000319532	SRC/BCL2/PTGS2/SIRT1/AURKA/PTK2B	6
BP	GO:0048592	eye morphogenesis	6/103	159/18903	0.00023524	0.000805718	0.000319532	STAT3/BCL2/HIF1A/KDR/FGF2/NTRK2	6
BP	GO:0051017	actin filament bundle assembly	6/103	160/18903	0.000243339	0.000832056	0.000329977	SRC/MTOR/CDC42/BRAF/ABL1/PTK2B	6
BP	GO:0120254	olefinic compound metabolic process	6/103	160/18903	0.000243339	0.000832056	0.000329977	PTGS2/CYP3A4/CYP19A1/PTGS1/CYP1A2/CYP2C9	6
BP	GO:0001836	release of cytochrome c from mitochondria	4/103	56/18903	0.000245624	0.000837756	0.000332237	AKT1/BCL2/MMP9/BCL2L1	4
BP	GO:0001954	positive regulation of cell-matrix adhesion	4/103	56/18903	0.000245624	0.000837756	0.000332237	GSK3B/KDR/ABL1/PTK2B	4
BP	GO:0034205	amyloid-beta formation	4/103	56/18903	0.000245624	0.000837756	0.000332237	TNF/CASP3/RELA/NTRK2	4
BP	GO:0002082	regulation of oxidative phosphorylation	3/103	23/18903	0.000257035	0.000870836	0.000345356	TNF/SNCA/VCP	3
BP	GO:0048143	astrocyte activation	3/103	23/18903	0.000257035	0.000870836	0.000345356	TNF/IL6/APP	3
BP	GO:0048169	regulation of long-term neuronal synaptic plasticity	3/103	23/18903	0.000257035	0.000870836	0.000345356	APP/SNCA/DRD2	3
BP	GO:0060444	branching involved in mammary gland duct morphogenesis	3/103	23/18903	0.000257035	0.000870836	0.000345356	SRC/ESR1/AR	3
BP	GO:0090335	regulation of brown fat cell differentiation	3/103	23/18903	0.000257035	0.000870836	0.000345356	PTGS2/SIRT1/MAPK14	3
BP	GO:1900543	negative regulation of purine nucleotide metabolic process	3/103	23/18903	0.000257035	0.000870836	0.000345356	STAT3/PARP1/PPARA	3
BP	GO:1902254	negative regulation of intrinsic apoptotic signaling pathway by p53 class mediator	3/103	23/18903	0.000257035	0.000870836	0.000345356	BCL2/SIRT1/MDM2	3
BP	GO:2001169	regulation of ATP biosynthetic process	3/103	23/18903	0.000257035	0.000870836	0.000345356	PARP1/PPARA/VCP	3
BP	GO:0051047	positive regulation of secretion	8/103	304/18903	0.000258566	0.000875294	0.000347124	HIF1A/PPARG/TLR4/JAK2/PTPN11/SNCA/DRD2/CYP19A1	8
BP	GO:0048168	regulation of neuronal synaptic plasticity	4/103	57/18903	0.000263062	0.000888299	0.000352281	APP/SNCA/GRIN2B/DRD2	4
BP	GO:0061756	leukocyte adhesion to vascular endothelial cell	4/103	57/18903	0.000263062	0.000888299	0.000352281	TNF/IL6/RELA/ITGB1	4
BP	GO:0070231	T cell apoptotic process	4/103	57/18903	0.000263062	0.000888299	0.000352281	AKT1/BCL2/HIF1A/LGALS3	4
BP	GO:0007200	phospholipase C-activating G protein-coupled receptor signaling pathway	5/103	105/18903	0.000273188	0.000920962	0.000365235	ESR1/AGTR1/DRD2/OPRM1/F2	5
BP	GO:0051588	regulation of neurotransmitter transport	5/103	105/18903	0.000273188	0.000920962	0.000365235	GSK3B/BRAF/ITGB1/SNCA/DRD2	5
BP	GO:0030856	regulation of epithelial cell differentiation	6/103	164/18903	0.000277955	0.000934711	0.000370688	TNF/MMP9/CCND1/FGF2/EZH2/XDH	6
BP	GO:0055067	monovalent inorganic cation homeostasis	6/103	164/18903	0.000277955	0.000934711	0.000370688	BCL2/MAPK3/MAPK1/ACE/AGTR1/DRD2	6
BP	GO:0061572	actin filament bundle organization	6/103	164/18903	0.000277955	0.000934711	0.000370688	SRC/MTOR/CDC42/BRAF/ABL1/PTK2B	6
BP	GO:0019369	arachidonic acid metabolic process	4/103	58/18903	0.000281373	0.000944641	0.000374626	PTGS2/PTGS1/CYP1A2/CYP2C9	4
BP	GO:0051898	negative regulation of protein kinase B signaling	4/103	58/18903	0.000281373	0.000944641	0.000374626	SIRT1/PPARA/DRD2/XDH	4
BP	GO:0001822	kidney development	8/103	309/18903	0.000288556	0.00096796	0.000383873	BCL2/MMP9/FGF2/CASP9/ACE/PDGFRB/REN/AGTR1	8
BP	GO:0010226	response to lithium ion	3/103	24/18903	0.000292593	0.000977474	0.000387647	PTGS2/NFE2L2/PTK2B	3
BP	GO:0035357	peroxisome proliferator activated receptor signaling pathway	3/103	24/18903	0.000292593	0.000977474	0.000387647	PPARG/SIRT1/RXRA	3
BP	GO:0051590	positive regulation of neurotransmitter transport	3/103	24/18903	0.000292593	0.000977474	0.000387647	ITGB1/SNCA/DRD2	3
BP	GO:0060571	morphogenesis of an epithelial fold	3/103	24/18903	0.000292593	0.000977474	0.000387647	EGFR/HIF1A/AR	3
BP	GO:2000637	positive regulation of miRNA-mediated gene silencing	3/103	24/18903	0.000292593	0.000977474	0.000387647	IL6/EGFR/STAT3	3
BP	GO:0007163	establishment or maintenance of cell polarity	7/103	234/18903	0.00029453	0.00098233	0.000389573	HSP90AA1/HSP90AB1/GSK3B/CDC42/ABL1/ITGB1/PTK2B	7
BP	GO:0009743	response to carbohydrate	7/103	234/18903	0.00029453	0.00098233	0.000389573	TNF/CASP3/HIF1A/PTGS2/PRKACA/ACE/PTK2B	7
BP	GO:0001701	in utero embryonic development	9/103	393/18903	0.000297244	0.00099057	0.00039284	AKT1/EGFR/HIF1A/MAPK1/BCL2L1/GRB2/CASP8/AR/ITGB1	9
BP	GO:0002027	regulation of heart rate	5/103	107/18903	0.000298195	0.000992925	0.000393774	TNF/MDM2/PRKACA/DRD2/CALM1	5
BP	GO:0022604	regulation of cell morphogenesis	8/103	312/18903	0.000307877	0.00102433	0.000406228	SRC/KDR/CDC42/BRAF/ABL1/FYN/PTK2B/F2	8
BP	GO:0032526	response to retinoic acid	5/103	108/18903	0.000311331	0.00103413	0.000410114	TNF/GSK3B/PDGFRB/RXRA/PTK2B	5
BP	GO:0044106	cellular amine metabolic process	5/103	108/18903	0.000311331	0.00103413	0.000410114	SNCA/MAOA/DRD2/MAOB/COMT	5
BP	GO:0048639	positive regulation of developmental growth	6/103	168/18903	0.00031633	0.00104988	0.000416359	AKT1/BCL2/MAPK14/FGF2/CDK1/DRD2	6
BP	GO:0019748	secondary metabolic process	4/103	60/18903	0.000320711	0.00106355	0.000421782	BCL2/NFE2L2/CYP3A4/CYP1A2	4
BP	GO:0006909	phagocytosis	8/103	314/18903	0.000321337	0.00106475	0.00042226	TNF/SRC/TLR4/PTPRC/CDC42/ABL1/ITGB1/FYN	8
BP	GO:0007160	cell-matrix adhesion	7/103	238/18903	0.000326319	0.00108038	0.000428459	SRC/BCL2/GSK3B/KDR/ABL1/ITGB1/PTK2B	7
BP	GO:0003081	regulation of systemic arterial blood pressure by renin-angiotensin	3/103	25/18903	0.000331179	0.00108587	0.000430636	ACE/REN/AGTR1	3
BP	GO:0042659	regulation of cell fate specification	3/103	25/18903	0.000331179	0.00108587	0.000430636	FGF2/HDAC1/AR	3
BP	GO:0045980	negative regulation of nucleotide metabolic process	3/103	25/18903	0.000331179	0.00108587	0.000430636	STAT3/PARP1/PPARA	3
BP	GO:0046697	decidualization	3/103	25/18903	0.000331179	0.00108587	0.000430636	PTGS2/PARP1/CTSB	3
BP	GO:0060148	positive regulation of post-transcriptional gene silencing	3/103	25/18903	0.000331179	0.00108587	0.000430636	IL6/EGFR/STAT3	3
BP	GO:0062149	detection of stimulus involved in sensory perception of pain	3/103	25/18903	0.000331179	0.00108587	0.000430636	TNF/FYN/NTRK1	3
BP	GO:0070423	nucleotide-binding oligomerization domain containing signaling pathway	3/103	25/18903	0.000331179	0.00108587	0.000430636	TLR4/RELA/NFKBIA	3
BP	GO:1900078	positive regulation of cellular response to insulin stimulus	3/103	25/18903	0.000331179	0.00108587	0.000430636	SRC/SIRT1/PTPN11	3
BP	GO:1900370	positive regulation of post-transcriptional gene silencing by RNA	3/103	25/18903	0.000331179	0.00108587	0.000430636	IL6/EGFR/STAT3	3
BP	GO:1901984	negative regulation of protein acetylation	3/103	25/18903	0.000331179	0.00108587	0.000430636	GSK3B/SIRT1/SNCA	3
BP	GO:1902993	positive regulation of amyloid precursor protein catabolic process	3/103	25/18903	0.000331179	0.00108587	0.000430636	TNF/CASP3/RELA	3
BP	GO:1904996	positive regulation of leukocyte adhesion to vascular endothelial cell	3/103	25/18903	0.000331179	0.00108587	0.000430636	TNF/IL6/RELA	3
BP	GO:0007281	germ cell development	8/103	316/18903	0.000335273	0.00109841	0.000435608	AKT1/SRC/BCL2/MTOR/BCL2L1/PRKACA/AURKA/PTK2B	8
BP	GO:1904356	regulation of telomere maintenance via telomere lengthening	4/103	61/18903	0.00034179	0.00111886	0.000443718	SRC/MAPK3/MAPK1/PARP1	4
BP	GO:0010948	negative regulation of cell cycle process	8/103	318/18903	0.000349699	0.00114291	0.000453257	BCL2/CCND1/MDM2/MAPK14/EZH2/CDK2/PTPN11/CDK1	8
BP	GO:0072001	renal system development	8/103	318/18903	0.000349699	0.00114291	0.000453257	BCL2/MMP9/FGF2/CASP9/ACE/PDGFRB/REN/AGTR1	8
BP	GO:0001676	long-chain fatty acid metabolic process	5/103	111/18903	0.000353381	0.00115217	0.000456928	PTGS2/CYP3A4/PTGS1/CYP1A2/CYP2C9	5
BP	GO:0021761	limbic system development	5/103	111/18903	0.000353381	0.00115217	0.000456928	CASP3/GSK3B/EZH2/HDAC1/DRD2	5
BP	GO:0022037	metencephalon development	5/103	111/18903	0.000353381	0.00115217	0.000456928	BCL2/EZH2/ABL1/PTPN11/HSPA5	5
BP	GO:0007254	JNK cascade	6/103	172/18903	0.000358744	0.00116778	0.000463119	TNF/EGFR/TLR4/APP/MAPK8/PTK2B	6
BP	GO:1990138	neuron projection extension	6/103	172/18903	0.000358744	0.00116778	0.000463119	HSP90AA1/HSP90AB1/GSK3B/ABL1/ITGB1/AURKA	6
BP	GO:0031102	neuron projection regeneration	4/103	62/18903	0.000363842	0.00117778	0.000467086	BCL2/JUN/JAK2/BRAF	4
BP	GO:0032233	positive regulation of actin filament bundle assembly	4/103	62/18903	0.000363842	0.00117778	0.000467086	MTOR/CDC42/BRAF/ABL1	4
BP	GO:0043030	regulation of macrophage activation	4/103	62/18903	0.000363842	0.00117778	0.000467086	IL6/TLR4/PTPRC/SNCA	4
BP	GO:0046902	regulation of mitochondrial membrane permeability	4/103	62/18903	0.000363842	0.00117778	0.000467086	BCL2/GSK3B/BCL2L1/MAPK8	4
BP	GO:0060038	cardiac muscle cell proliferation	4/103	62/18903	0.000363842	0.00117778	0.000467086	MAPK14/FGF2/ABL1/CDK1	4
BP	GO:0070228	regulation of lymphocyte apoptotic process	4/103	62/18903	0.000363842	0.00117778	0.000467086	BCL2/HIF1A/IL2/LGALS3	4
BP	GO:0090303	positive regulation of wound healing	4/103	62/18903	0.000363842	0.00117778	0.000467086	MTOR/ITGB1/NFE2L2/F2	4
BP	GO:0006706	steroid catabolic process	3/103	26/18903	0.000372899	0.00119852	0.000475308	CYP3A4/CYP19A1/CYP1A2	3
BP	GO:0032515	negative regulation of phosphoprotein phosphatase activity	3/103	26/18903	0.000372899	0.00119852	0.000475308	TNF/GSK3B/LGALS3	3
BP	GO:0033598	mammary gland epithelial cell proliferation	3/103	26/18903	0.000372899	0.00119852	0.000475308	ESR1/CCND1/MAPK1	3
BP	GO:0035235	ionotropic glutamate receptor signaling pathway	3/103	26/18903	0.000372899	0.00119852	0.000475308	APP/GRIN2B/PTK2B	3
BP	GO:0035872	nucleotide-binding domain, leucine rich repeat containing receptor signaling pathway	3/103	26/18903	0.000372899	0.00119852	0.000475308	TLR4/RELA/NFKBIA	3
BP	GO:0042178	xenobiotic catabolic process	3/103	26/18903	0.000372899	0.00119852	0.000475308	CYP3A4/CYP1A2/CYP2C9	3
BP	GO:0045822	negative regulation of heart contraction	3/103	26/18903	0.000372899	0.00119852	0.000475308	TNF/JAK2/IL2	3
BP	GO:1990806	ligand-gated ion channel signaling pathway	3/103	26/18903	0.000372899	0.00119852	0.000475308	APP/GRIN2B/PTK2B	3
BP	GO:2000773	negative regulation of cellular senescence	3/103	26/18903	0.000372899	0.00119852	0.000475308	SIRT1/ABL1/TERT	3
BP	GO:0031214	biomineral tissue development	6/103	174/18903	0.000381556	0.00122538	0.00048596	HIF1A/PTGS2/PPARA/RXRA/PTK2B/ADRB2	6
BP	GO:1905954	positive regulation of lipid localization	5/103	113/18903	0.000383712	0.00123133	0.00048832	PPARG/SIRT1/NFKBIA/CYP19A1/RXRA	5
BP	GO:0010573	vascular endothelial growth factor production	4/103	63/18903	0.000386894	0.00123764	0.000490822	TNF/IL6/HIF1A/PTGS2	4
BP	GO:0032481	positive regulation of type I interferon production	4/103	63/18903	0.000386894	0.00123764	0.000490822	GAPDH/HSP90AA1/TLR4/PTPN11	4
BP	GO:0046173	polyol biosynthetic process	4/103	63/18903	0.000386894	0.00123764	0.000490822	FGF2/CYP3A4/SNCA/PTK2B	4
BP	GO:0050994	regulation of lipid catabolic process	4/103	63/18903	0.000386894	0.00123764	0.000490822	AKT1/TNF/CDK4/PPARA	4
BP	GO:0002526	acute inflammatory response	5/103	114/18903	0.000399595	0.00127626	0.000506139	TNF/IL6/PTGS2/OPRM1/F2	5
BP	GO:0002824	positive regulation of adaptive immune response based on somatic recombination of immune receptors built from immunoglobulin superfamily domains	5/103	114/18903	0.000399595	0.00127626	0.000506139	TNF/IL6/JAK2/IL2/PTPRC	5
BP	GO:0022900	electron transport chain	6/103	176/18903	0.000405489	0.00129204	0.000512397	CDK1/SNCA/MAOB/CYP19A1/GSR/CYP1A2	6
BP	GO:0032635	interleukin-6 production	6/103	176/18903	0.000405489	0.00129204	0.000512397	TNF/IL6/STAT3/TLR4/APP/PTPN11	6
BP	GO:0032675	regulation of interleukin-6 production	6/103	176/18903	0.000405489	0.00129204	0.000512397	TNF/IL6/STAT3/TLR4/APP/PTPN11	6
BP	GO:0019229	regulation of vasoconstriction	4/103	64/18903	0.000410972	0.00130746	0.000518514	PTGS2/ABL1/ACE/AGTR1	4
BP	GO:0071384	cellular response to corticosteroid stimulus	4/103	64/18903	0.000410972	0.00130746	0.000518514	JAK2/CASP9/ACE/NR3C1	4
BP	GO:0046394	carboxylic acid biosynthetic process	8/103	326/18903	0.000412567	0.00131151	0.000520119	PTGS2/SIRT1/CASP1/CYP3A4/FASN/PTGS1/CYP1A2/CYP2C9	8
BP	GO:0033559	unsaturated fatty acid metabolic process	5/103	115/18903	0.00041597	0.00131497	0.000521489	PTGS2/SIRT1/PTGS1/CYP1A2/CYP2C9	5
BP	GO:0034502	protein localization to chromosome	5/103	115/18903	0.00041597	0.00131497	0.000521489	ESR1/EZH2/CDK1/TERT/VCP	5
BP	GO:0034766	negative regulation of ion transmembrane transport	5/103	115/18903	0.00041597	0.00131497	0.000521489	TNF/BCL2/MMP9/DRD2/CALM1	5
BP	GO:0035710	CD4-positive, alpha-beta T cell activation	5/103	115/18903	0.00041597	0.00131497	0.000521489	IL6/STAT3/MTOR/IL2/BRAF	5
BP	GO:0001963	synaptic transmission, dopaminergic	3/103	27/18903	0.000417855	0.00131497	0.000521489	PTGS2/SNCA/DRD2	3
BP	GO:0031954	positive regulation of protein autophosphorylation	3/103	27/18903	0.000417855	0.00131497	0.000521489	SRC/ACE/CALM1	3
BP	GO:0032740	positive regulation of interleukin-17 production	3/103	27/18903	0.000417855	0.00131497	0.000521489	IL6/JAK2/IL2	3
BP	GO:0042133	neurotransmitter metabolic process	3/103	27/18903	0.000417855	0.00131497	0.000521489	MAOA/MAOB/COMT	3
BP	GO:0045745	positive regulation of G protein-coupled receptor signaling pathway	3/103	27/18903	0.000417855	0.00131497	0.000521489	PRKCA/DRD2/F2	3
BP	GO:0051953	negative regulation of amine transport	3/103	27/18903	0.000417855	0.00131497	0.000521489	TNF/SNCA/DRD2	3
BP	GO:0071280	cellular response to copper ion	3/103	27/18903	0.000417855	0.00131497	0.000521489	APP/NFE2L2/SNCA	3
BP	GO:0071549	cellular response to dexamethasone stimulus	3/103	27/18903	0.000417855	0.00131497	0.000521489	JAK2/CASP9/NR3C1	3
BP	GO:1903523	negative regulation of blood circulation	3/103	27/18903	0.000417855	0.00131497	0.000521489	TNF/JAK2/IL2	3
BP	GO:0045926	negative regulation of growth	7/103	249/18903	0.000428156	0.00134634	0.000533933	BCL2/HIF1A/SIRT1/PPARA/ESR2/ADRB2/G6PD	7
BP	GO:0016053	organic acid biosynthetic process	8/103	328/18903	0.000429642	0.00134997	0.000535371	PTGS2/SIRT1/CASP1/CYP3A4/FASN/PTGS1/CYP1A2/CYP2C9	8
BP	GO:0098586	cellular response to virus	5/103	116/18903	0.000432847	0.00135899	0.000538949	IL6/HSP90AA1/HIF1A/JAK2/MAPK14	5
BP	GO:0015800	acidic amino acid transport	4/103	65/18903	0.000436101	0.0013671	0.000542164	TNF/ITGB1/SNCA/NTRK2	4
BP	GO:2000272	negative regulation of signaling receptor activity	4/103	65/18903	0.000436101	0.0013671	0.000542164	TNF/PPARG/PPARA/ESR2	4
BP	GO:0090276	regulation of peptide hormone secretion	6/103	179/18903	0.00044357	0.00138944	0.000551026	TNF/IL6/HIF1A/JAK2/PTPN11/DRD2	6
BP	GO:0009308	amine metabolic process	5/103	117/18903	0.000450235	0.00140924	0.000558875	SNCA/MAOA/DRD2/MAOB/COMT	5
BP	GO:0002675	positive regulation of acute inflammatory response	3/103	28/18903	0.00046615	0.00145235	0.000575972	TNF/IL6/PTGS2	3
BP	GO:0030878	thyroid gland development	3/103	28/18903	0.00046615	0.00145235	0.000575972	MAPK3/MAPK1/BRAF	3
BP	GO:0032958	inositol phosphate biosynthetic process	3/103	28/18903	0.00046615	0.00145235	0.000575972	FGF2/SNCA/PTK2B	3
BP	GO:0060765	regulation of androgen receptor signaling pathway	3/103	28/18903	0.00046615	0.00145235	0.000575972	SIRT1/EP300/HDAC1	3
BP	GO:1903649	regulation of cytoplasmic transport	3/103	28/18903	0.00046615	0.00145235	0.000575972	SRC/MAPK3/MAPK1	3
BP	GO:1903959	regulation of anion transmembrane transport	3/103	28/18903	0.00046615	0.00145235	0.000575972	TNF/ITGB1/ABCB1	3
BP	GO:0002286	T cell activation involved in immune response	5/103	118/18903	0.000468145	0.00145745	0.000577994	IL6/STAT3/MTOR/IL2/LGALS3	5
BP	GO:0110148	biomineralization	6/103	181/18903	0.000470471	0.00146357	0.000580421	HIF1A/PTGS2/PPARA/RXRA/PTK2B/ADRB2	6
BP	GO:0002791	regulation of peptide secretion	6/103	182/18903	0.000484389	0.00150571	0.000597136	TNF/IL6/HIF1A/JAK2/PTPN11/DRD2	6
BP	GO:0015718	monocarboxylic acid transport	5/103	119/18903	0.000486587	0.00150909	0.000598473	TNF/PTGS2/ACE/ABCG2/DRD2	5
BP	GO:0032609	interferon-gamma production	5/103	119/18903	0.000486587	0.00150909	0.000598473	TNF/TLR4/JAK2/IL2/ABL1	5
BP	GO:0032649	regulation of interferon-gamma production	5/103	119/18903	0.000486587	0.00150909	0.000598473	TNF/TLR4/JAK2/IL2/ABL1	5
BP	GO:0007405	neuroblast proliferation	4/103	67/18903	0.000489617	0.00151617	0.000601284	HIF1A/FGF2/ITGB1/DRD2	4
BP	GO:0015909	long-chain fatty acid transport	4/103	67/18903	0.000489617	0.00151617	0.000601284	AKT1/PPARG/ACE/DRD2	4
BP	GO:0030073	insulin secretion	6/103	183/18903	0.000498627	0.00154173	0.000611418	TNF/IL6/HIF1A/JAK2/PTPN11/DRD2	6
BP	GO:0044000	movement in host	6/103	183/18903	0.000498627	0.00154173	0.000611418	SRC/EGFR/ITGB1/CDK1/CTSB/AGTR1	6
BP	GO:0035967	cellular response to topologically incorrect protein	5/103	120/18903	0.00050557	0.00156201	0.000619461	CCND1/EP300/HSPA5/NFE2L2/VCP	5
BP	GO:0090087	regulation of peptide transport	6/103	184/18903	0.000513189	0.00158434	0.000628319	TNF/IL6/HIF1A/JAK2/PTPN11/DRD2	6
BP	GO:0010575	positive regulation of vascular endothelial growth factor production	3/103	29/18903	0.000517885	0.00158853	0.000629978	IL6/HIF1A/PTGS2	3
BP	GO:0010592	positive regulation of lamellipodium assembly	3/103	29/18903	0.000517885	0.00158853	0.000629978	HSP90AA1/MTOR/CDC42	3
BP	GO:0010800	positive regulation of peptidyl-threonine phosphorylation	3/103	29/18903	0.000517885	0.00158853	0.000629978	MAPK1/APP/CALM1	3
BP	GO:0031571	mitotic G1 DNA damage checkpoint signaling	3/103	29/18903	0.000517885	0.00158853	0.000629978	CCND1/MDM2/CDK2	3
BP	GO:0042759	long-chain fatty acid biosynthetic process	3/103	29/18903	0.000517885	0.00158853	0.000629978	CYP3A4/CYP1A2/CYP2C9	3
BP	GO:0048265	response to pain	3/103	29/18903	0.000517885	0.00158853	0.000629978	AKT1/MTOR/NTRK1	3
BP	GO:0097066	response to thyroid hormone	3/103	29/18903	0.000517885	0.00158853	0.000629978	ACE/CTSB/CTSS	3
BP	GO:0042093	T-helper cell differentiation	4/103	68/18903	0.000518057	0.00158853	0.000629978	IL6/STAT3/MTOR/IL2	4
BP	GO:0042987	amyloid precursor protein catabolic process	4/103	68/18903	0.000518057	0.00158853	0.000629978	TNF/CASP3/RELA/NTRK2	4
BP	GO:0000075	cell cycle checkpoint signaling	6/103	186/18903	0.000543305	0.00166469	0.000660183	CCND1/MDM2/MAPK14/CDK2/PTPN11/CDK1	6
BP	GO:0002761	regulation of myeloid leukocyte differentiation	5/103	122/18903	0.000545204	0.001668	0.000661493	TNF/MTOR/TLR4/CASP8/PRKCA	5
BP	GO:0048675	axon extension	5/103	122/18903	0.000545204	0.001668	0.000661493	HSP90AA1/HSP90AB1/GSK3B/ABL1/ITGB1	5
BP	GO:0014015	positive regulation of gliogenesis	4/103	69/18903	0.000547653	0.00167172	0.00066297	TNF/IL6/MTOR/HDAC1	4
BP	GO:0048645	animal organ formation	4/103	69/18903	0.000547653	0.00167172	0.00066297	MAPK3/MAPK1/FGF2/AR	4
BP	GO:2000401	regulation of lymphocyte migration	4/103	69/18903	0.000547653	0.00167172	0.00066297	AKT1/APP/ABL1/PTK2B	4
BP	GO:0060828	regulation of canonical Wnt signaling pathway	7/103	260/18903	0.00055397	0.00168973	0.000670115	SRC/EGFR/GSK3B/MAPK14/FGF2/HDAC1/VCP	7
BP	GO:0002700	regulation of production of molecular mediator of immune response	6/103	187/18903	0.00055887	0.0017034	0.000675535	TNF/IL6/TLR4/SIRT1/IL2/PTPRC	6
BP	GO:0002224	toll-like receptor signaling pathway	5/103	123/18903	0.000565874	0.00172217	0.000682979	TNF/ESR1/TLR4/NFKBIA/CTSS	5
BP	GO:0030282	bone mineralization	5/103	123/18903	0.000565874	0.00172217	0.000682979	HIF1A/PTGS2/RXRA/PTK2B/ADRB2	5
BP	GO:0022412	cellular process involved in reproduction in multicellular organism	9/103	430/18903	0.000570601	0.0017301	0.000686125	AKT1/SRC/BCL2/MTOR/BCL2L1/PRKACA/ITGB1/AURKA/PTK2B	9
BP	GO:0008209	androgen metabolic process	3/103	30/18903	0.000573158	0.0017301	0.000686125	ESR1/CYP3A4/CYP19A1	3
BP	GO:0044819	mitotic G1/S transition checkpoint signaling	3/103	30/18903	0.000573158	0.0017301	0.000686125	CCND1/MDM2/CDK2	3
BP	GO:0060045	positive regulation of cardiac muscle cell proliferation	3/103	30/18903	0.000573158	0.0017301	0.000686125	MAPK14/FGF2/CDK1	3
BP	GO:0070498	interleukin-1-mediated signaling pathway	3/103	30/18903	0.000573158	0.0017301	0.000686125	IL6/MAPK3/RELA	3
BP	GO:0071480	cellular response to gamma radiation	3/103	30/18903	0.000573158	0.0017301	0.000686125	MDM2/BCL2L1/HSPA5	3
BP	GO:0072539	T-helper 17 cell differentiation	3/103	30/18903	0.000573158	0.0017301	0.000686125	IL6/STAT3/IL2	3
BP	GO:0090140	regulation of mitochondrial fission	3/103	30/18903	0.000573158	0.0017301	0.000686125	PPARG/KDR/AURKA	3
BP	GO:0090330	regulation of platelet aggregation	3/103	30/18903	0.000573158	0.0017301	0.000686125	IL6/JAK2/PRKCA	3
BP	GO:1902230	negative regulation of intrinsic apoptotic signaling pathway in response to DNA damage	3/103	30/18903	0.000573158	0.0017301	0.000686125	BCL2/SIRT1/BCL2L1	3
BP	GO:2000463	positive regulation of excitatory postsynaptic potential	3/103	30/18903	0.000573158	0.0017301	0.000686125	GRIN2B/PTK2B/ADRB2	3
BP	GO:0002294	CD4-positive, alpha-beta T cell differentiation involved in immune response	4/103	70/18903	0.000578432	0.00174344	0.000691412	IL6/STAT3/MTOR/IL2	4
BP	GO:0014823	response to activity	4/103	70/18903	0.000578432	0.00174344	0.000691412	TNF/IL6/HIF1A/CDK1	4
BP	GO:0001906	cell killing	6/103	189/18903	0.000591039	0.00178012	0.000705958	GAPDH/HSP90AB1/BCL2L1/PTPRC/MAPK8/F2	6
BP	GO:0051302	regulation of cell division	6/103	190/18903	0.000607653	0.0018288	0.000725267	BCL2L1/CDC42/FGF2/AURKA/DRD2/CALM1	6
BP	GO:0002287	alpha-beta T cell activation involved in immune response	4/103	71/18903	0.00061042	0.00183171	0.000726419	IL6/STAT3/MTOR/IL2	4
BP	GO:0002293	alpha-beta T cell differentiation involved in immune response	4/103	71/18903	0.00061042	0.00183171	0.000726419	IL6/STAT3/MTOR/IL2	4
BP	GO:0032922	circadian regulation of gene expression	4/103	71/18903	0.00061042	0.00183171	0.000726419	SIRT1/HDAC1/PPARA/DRD2	4
BP	GO:0033344	cholesterol efflux	4/103	71/18903	0.00061042	0.00183171	0.000726419	PPARG/SIRT1/NFKBIA/RXRA	4
BP	GO:0032411	positive regulation of transporter activity	5/103	126/18903	0.000631429	0.00189108	0.000749966	ABCB1/CTSS/RXRA/ADRB2/CALM1	5
BP	GO:0002313	mature B cell differentiation involved in immune response	3/103	31/18903	0.000632065	0.00189108	0.000749966	IL6/IL2/PTK2B	3
BP	GO:0048384	retinoic acid receptor signaling pathway	3/103	31/18903	0.000632065	0.00189108	0.000749966	PPARG/EZH2/RXRA	3
BP	GO:0060390	regulation of SMAD protein signal transduction	3/103	31/18903	0.000632065	0.00189108	0.000749966	PPARG/JAK2/PARP1	3
BP	GO:0045600	positive regulation of fat cell differentiation	4/103	72/18903	0.000643643	0.00192008	0.000761464	AKT1/PPARG/PTGS2/MAPK14	4
BP	GO:0046626	regulation of insulin receptor signaling pathway	4/103	72/18903	0.000643643	0.00192008	0.000761464	SRC/SIRT1/CDK4/PTPN11	4
BP	GO:0050709	negative regulation of protein secretion	4/103	72/18903	0.000643643	0.00192008	0.000761464	PTPN11/HMGCR/DRD2/OPRM1	4
BP	GO:1900076	regulation of cellular response to insulin stimulus	4/103	72/18903	0.000643643	0.00192008	0.000761464	SRC/PPARG/SIRT1/PTPN11	4
BP	GO:0002688	regulation of leukocyte chemotaxis	5/103	127/18903	0.000654497	0.00195102	0.000773737	IL6/MAPK3/MAPK1/CYP19A1/PTK2B	5
BP	GO:0006936	muscle contraction	8/103	351/18903	0.000670752	0.00199802	0.000792373	TNF/HSP90AA1/PTGS2/MTOR/PRKACA/DRD2/ADRB2/CALM1	8
BP	GO:1901991	negative regulation of mitotic cell cycle phase transition	6/103	194/18903	0.000677772	0.0020128	0.000798238	BCL2/CCND1/MDM2/EZH2/CDK2/CDK1	6
BP	GO:0030032	lamellipodium assembly	4/103	73/18903	0.000678129	0.0020128	0.000798238	HSP90AA1/MTOR/CDC42/ITGB1	4
BP	GO:0050795	regulation of behavior	4/103	73/18903	0.000678129	0.0020128	0.000798238	STAT3/MTOR/PARP1/DRD2	4
BP	GO:0050805	negative regulation of synaptic transmission	4/103	73/18903	0.000678129	0.0020128	0.000798238	PTGS2/BRAF/DRD2/PTK2B	4
BP	GO:0046683	response to organophosphorus	5/103	128/18903	0.00067819	0.0020128	0.000798238	PTGS2/APP/HSPA5/REN/PTK2B	5
BP	GO:0090150	establishment of protein localization to membrane	7/103	270/18903	0.000692401	0.00205282	0.000814109	EGFR/HSP90AA1/ERBB2/BRAF/MAPK8/HSPA5/FYN	7
BP	GO:0001516	prostaglandin biosynthetic process	3/103	32/18903	0.000694701	0.00205282	0.000814109	PTGS2/SIRT1/PTGS1	3
BP	GO:0002862	negative regulation of inflammatory response to antigenic stimulus	3/103	32/18903	0.000694701	0.00205282	0.000814109	SRC/MAPK14/FYN	3
BP	GO:0046457	prostanoid biosynthetic process	3/103	32/18903	0.000694701	0.00205282	0.000814109	PTGS2/SIRT1/PTGS1	3
BP	GO:0046825	regulation of protein export from nucleus	3/103	32/18903	0.000694701	0.00205282	0.000814109	GSK3B/PRKACA/PTPN11	3
BP	GO:1901889	negative regulation of cell junction assembly	3/103	32/18903	0.000694701	0.00205282	0.000814109	TNF/SRC/ACE	3
BP	GO:0051495	positive regulation of cytoskeleton organization	6/103	195/18903	0.000696244	0.00205589	0.000815325	MTOR/GRB2/CDC42/BRAF/ABL1/PTK2B	6
BP	GO:2000027	regulation of animal organ morphogenesis	5/103	129/18903	0.00070252	0.00207292	0.000822078	TNF/CDC42/FGF2/ABL1/AR	5
BP	GO:0032874	positive regulation of stress-activated MAPK cascade	5/103	130/18903	0.000727498	0.00214506	0.00085069	TNF/TLR4/APP/PTK2B/XDH	5
BP	GO:0002819	regulation of adaptive immune response	6/103	198/18903	0.000754008	0.00222162	0.000881051	TNF/IL6/SIRT1/JAK2/IL2/PTPRC	6
BP	GO:0030511	positive regulation of transforming growth factor beta receptor signaling pathway	3/103	33/18903	0.000761159	0.00223138	0.000884921	HSP90AB1/EP300/CREBBP	3
BP	GO:0045907	positive regulation of vasoconstriction	3/103	33/18903	0.000761159	0.00223138	0.000884921	PTGS2/ABL1/ACE	3
BP	GO:0050974	detection of mechanical stimulus involved in sensory perception	3/103	33/18903	0.000761159	0.00223138	0.000884921	TNF/FYN/NTRK1	3
BP	GO:0090279	regulation of calcium ion import	3/103	33/18903	0.000761159	0.00223138	0.000884921	ACE/PDGFRB/LGALS3	3
BP	GO:0098801	regulation of renal system process	3/103	33/18903	0.000761159	0.00223138	0.000884921	ACE/AGTR1/DRD2	3
BP	GO:1902253	regulation of intrinsic apoptotic signaling pathway by p53 class mediator	3/103	33/18903	0.000761159	0.00223138	0.000884921	BCL2/SIRT1/MDM2	3
BP	GO:1903846	positive regulation of cellular response to transforming growth factor beta stimulus	3/103	33/18903	0.000761159	0.00223138	0.000884921	HSP90AB1/EP300/CREBBP	3
BP	GO:0048565	digestive tract development	5/103	132/18903	0.000779439	0.00228168	0.00090487	TNF/SRC/EGFR/BCL2/HIF1A	5
BP	GO:0070304	positive regulation of stress-activated protein kinase signaling cascade	5/103	132/18903	0.000779439	0.00228168	0.00090487	TNF/TLR4/APP/PTK2B/XDH	5
BP	GO:0002637	regulation of immunoglobulin production	4/103	76/18903	0.000789426	0.00230926	0.000915805	TNF/IL6/IL2/PTPRC	4
BP	GO:0002702	positive regulation of production of molecular mediator of immune response	5/103	133/18903	0.000806425	0.00235729	0.000934853	IL6/TLR4/SIRT1/IL2/PTPRC	5
BP	GO:0032271	regulation of protein polymerization	6/103	201/18903	0.000815414	0.00238185	0.000944594	HSP90AA1/MTOR/GRB2/ABL1/SNCA/PTK2B	6
BP	GO:1901616	organic hydroxy compound catabolic process	4/103	77/18903	0.000829228	0.00242024	0.000959818	CYP3A4/MAOA/MAOB/COMT	4
BP	GO:0009112	nucleobase metabolic process	3/103	34/18903	0.000831529	0.00242024	0.000959818	MTOR/MAPK1/XDH	3
BP	GO:0035308	negative regulation of protein dephosphorylation	3/103	34/18903	0.000831529	0.00242024	0.000959818	TNF/GSK3B/LGALS3	3
BP	GO:0045648	positive regulation of erythrocyte differentiation	3/103	34/18903	0.000831529	0.00242024	0.000959818	STAT3/HIF1A/MAPK14	3
BP	GO:1901797	negative regulation of signal transduction by p53 class mediator	3/103	34/18903	0.000831529	0.00242024	0.000959818	BCL2/SIRT1/MDM2	3
BP	GO:0007015	actin filament organization	9/103	454/18903	0.000839326	0.00244118	0.000968125	SRC/BCL2/MTOR/JAK2/GRB2/CDC42/BRAF/ABL1/PTK2B	9
BP	GO:1903828	negative regulation of protein localization	6/103	203/18903	0.000858449	0.00249502	0.000989476	GSK3B/BCL2L1/PTPN11/HMGCR/DRD2/OPRM1	6
BP	GO:2001235	positive regulation of apoptotic signaling pathway	5/103	135/18903	0.000862482	0.00250495	0.000993415	TNF/SIRT1/JAK2/PTPRC/MCL1	5
BP	GO:0090049	regulation of cell migration involved in sprouting angiogenesis	4/103	78/18903	0.000870425	0.00252622	0.00100185	PTGS2/KDR/FGF2/ABL1	4
BP	GO:0051258	protein polymerization	7/103	281/18903	0.000875001	0.00253769	0.0010064	HSP90AA1/MTOR/JAK2/GRB2/ABL1/SNCA/PTK2B	7
BP	GO:0050864	regulation of B cell activation	6/103	204/18903	0.000880614	0.00255215	0.00101213	IL6/BCL2/CASP3/TLR4/IL2/PTPRC	6
BP	GO:0002446	neutrophil mediated immunity	3/103	35/18903	0.000905902	0.00261984	0.00103898	IL6/ACE/F2	3
BP	GO:0033146	regulation of intracellular estrogen receptor signaling pathway	3/103	35/18903	0.000905902	0.00261984	0.00103898	SRC/PARP1/AR	3
BP	GO:0035633	maintenance of blood-brain barrier	3/103	35/18903	0.000905902	0.00261984	0.00103898	IL6/PTGS2/ITGB1	3
BP	GO:0002292	T cell differentiation involved in immune response	4/103	79/18903	0.000913045	0.00263862	0.00104642	IL6/STAT3/MTOR/IL2	4
BP	GO:0072659	protein localization to plasma membrane	7/103	285/18903	0.000950111	0.00274379	0.00108813	AKT1/TNF/EGFR/BCL2L1/AR/ITGB1/LGALS3	7
BP	GO:0001818	negative regulation of cytokine production	8/103	371/18903	0.00096015	0.00277082	0.00109885	TNF/IL6/HSP90AB1/TLR4/PTPRC/EZH2/PPARA/F2	8
BP	GO:0045216	cell-cell junction organization	6/103	208/18903	0.000973723	0.00280799	0.00111359	TNF/SRC/CDC42/PRKACA/PRKCA/ACE	6
BP	GO:0015711	organic anion transport	8/103	372/18903	0.000976897	0.00281515	0.00111643	TNF/PTGS2/ITGB1/ACE/SNCA/ABCG2/NTRK2/DRD2	8
BP	GO:0072175	epithelial tube formation	5/103	139/18903	0.000983254	0.00282467	0.00112021	CASP3/HIF1A/PRKACA/FGF2/ABL1	5
BP	GO:0010614	negative regulation of cardiac muscle hypertrophy	3/103	36/18903	0.000984363	0.00282467	0.00112021	PPARG/PPARA/G6PD	3
BP	GO:0030224	monocyte differentiation	3/103	36/18903	0.000984363	0.00282467	0.00112021	JUN/PPARG/FASN	3
BP	GO:0060323	head morphogenesis	3/103	36/18903	0.000984363	0.00282467	0.00112021	EP300/BRAF/PTPN11	3
BP	GO:0098810	neurotransmitter reuptake	3/103	36/18903	0.000984363	0.00282467	0.00112021	ITGB1/SNCA/DRD2	3
BP	GO:1905332	positive regulation of morphogenesis of an epithelium	3/103	36/18903	0.000984363	0.00282467	0.00112021	FGF2/ABL1/AR	3
BP	GO:0030100	regulation of endocytosis	6/103	209/18903	0.000998142	0.00286102	0.00113462	SRC/CDC42/ABL1/SNCA/LGALS3/DRD2	6
BP	GO:0001570	vasculogenesis	4/103	81/18903	0.00100266	0.00286102	0.00113462	KDR/PDGFRB/NTRK2/XDH	4
BP	GO:0007422	peripheral nervous system development	4/103	81/18903	0.00100266	0.00286102	0.00113462	AKT1/ERBB2/CDK1/NTRK2	4
BP	GO:0032371	regulation of sterol transport	4/103	81/18903	0.00100266	0.00286102	0.00113462	PPARG/SIRT1/NFKBIA/RXRA	4
BP	GO:0032374	regulation of cholesterol transport	4/103	81/18903	0.00100266	0.00286102	0.00113462	PPARG/SIRT1/NFKBIA/RXRA	4
BP	GO:0033555	multicellular organismal response to stress	4/103	81/18903	0.00100266	0.00286102	0.00113462	AKT1/BCL2/MTOR/NTRK1	4
BP	GO:0044773	mitotic DNA damage checkpoint signaling	4/103	81/18903	0.00100266	0.00286102	0.00113462	CCND1/MDM2/CDK2/CDK1	4
BP	GO:0072332	intrinsic apoptotic signaling pathway by p53 class mediator	4/103	81/18903	0.00100266	0.00286102	0.00113462	BCL2/SIRT1/EP300/MDM2	4
BP	GO:0007266	Rho protein signal transduction	5/103	140/18903	0.00101532	0.00289511	0.00114814	CDC42/ABL1/ITGB1/PDGFRB/AGTR1	5
BP	GO:0031396	regulation of protein ubiquitination	6/103	210/18903	0.00102303	0.00291506	0.00115606	AKT1/HSP90AA1/HSP90AB1/ABL1/HSPA5/FYN	6
BP	GO:0002460	adaptive immune response based on somatic recombination of immune receptors built from immunoglobulin superfamily domains	8/103	375/18903	0.00102855	0.00292874	0.00116148	TNF/IL6/STAT3/MTOR/TLR4/JAK2/IL2/PTPRC	8
BP	GO:0043087	regulation of GTPase activity	8/103	376/18903	0.00104624	0.00297234	0.00117877	ERBB2/MTOR/GSK3B/EZH2/ITGB1/NTRK1/NTRK2/PTK2B	8
BP	GO:0034754	cellular hormone metabolic process	5/103	141/18903	0.00104815	0.00297234	0.00117877	ESR1/CYP3A4/CYP19A1/CYP1A2/CYP2C9	5
BP	GO:0045667	regulation of osteoblast differentiation	5/103	141/18903	0.00104815	0.00297234	0.00117877	TNF/IL6/PPARG/PRKACA/FGF2	5
BP	GO:0046328	regulation of JNK cascade	5/103	141/18903	0.00104815	0.00297234	0.00117877	TNF/EGFR/TLR4/APP/PTK2B	5
BP	GO:0021766	hippocampus development	4/103	82/18903	0.00104971	0.00297234	0.00117877	CASP3/GSK3B/EZH2/HDAC1	4
BP	GO:0060395	SMAD protein signal transduction	4/103	82/18903	0.00104971	0.00297234	0.00117877	JUN/PPARG/JAK2/PARP1	4
BP	GO:1905897	regulation of response to endoplasmic reticulum stress	4/103	82/18903	0.00104971	0.00297234	0.00117877	SIRT1/BCL2L1/HSPA5/NFE2L2	4
BP	GO:2001021	negative regulation of response to DNA damage stimulus	4/103	82/18903	0.00104971	0.00297234	0.00117877	BCL2/SIRT1/MDM2/BCL2L1	4
BP	GO:0002335	mature B cell differentiation	3/103	37/18903	0.001067	0.00300875	0.00119321	IL6/IL2/PTK2B	3
BP	GO:0010923	negative regulation of phosphatase activity	3/103	37/18903	0.001067	0.00300875	0.00119321	TNF/GSK3B/LGALS3	3
BP	GO:0034110	regulation of homotypic cell-cell adhesion	3/103	37/18903	0.001067	0.00300875	0.00119321	IL6/JAK2/PRKCA	3
BP	GO:0055023	positive regulation of cardiac muscle tissue growth	3/103	37/18903	0.001067	0.00300875	0.00119321	MAPK14/FGF2/CDK1	3
BP	GO:0060416	response to growth hormone	3/103	37/18903	0.001067	0.00300875	0.00119321	AKT1/STAT3/JAK2	3
BP	GO:0070229	negative regulation of lymphocyte apoptotic process	3/103	37/18903	0.001067	0.00300875	0.00119321	BCL2/HIF1A/IL2	3
BP	GO:0014074	response to purine-containing compound	5/103	142/18903	0.00108176	0.00304616	0.00120805	PTGS2/APP/HSPA5/REN/PTK2B	5
BP	GO:0042552	myelination	5/103	142/18903	0.00108176	0.00304616	0.00120805	AKT1/TNF/ERBB2/MTOR/NTRK2	5
BP	GO:0006094	gluconeogenesis	4/103	83/18903	0.00109829	0.00308202	0.00122227	SIRT1/EP300/PPARA/NR3C1	4
BP	GO:0014032	neural crest cell development	4/103	83/18903	0.00109829	0.00308202	0.00122227	HIF1A/MAPK3/MAPK1/CDC42	4
BP	GO:0030500	regulation of bone mineralization	4/103	83/18903	0.00109829	0.00308202	0.00122227	HIF1A/RXRA/PTK2B/ADRB2	4
BP	GO:0031507	heterochromatin formation	4/103	83/18903	0.00109829	0.00308202	0.00122227	SIRT1/EZH2/HDAC1/CDK2	4
BP	GO:0042310	vasoconstriction	4/103	83/18903	0.00109829	0.00308202	0.00122227	PTGS2/ABL1/ACE/AGTR1	4
BP	GO:0030534	adult behavior	5/103	143/18903	0.00111617	0.00312574	0.00123961	APP/PPARA/SNCA/DRD2/OPRM1	5
BP	GO:0045727	positive regulation of translation	5/103	143/18903	0.00111617	0.00312574	0.00123961	TNF/IL6/ERBB2/MTOR/PTK2B	5
BP	GO:0055123	digestive system development	5/103	143/18903	0.00111617	0.00312574	0.00123961	TNF/SRC/EGFR/BCL2/HIF1A	5
BP	GO:0007272	ensheathment of neurons	5/103	144/18903	0.00115139	0.00321589	0.00127536	AKT1/TNF/ERBB2/MTOR/NTRK2	5
BP	GO:0008366	axon ensheathment	5/103	144/18903	0.00115139	0.00321589	0.00127536	AKT1/TNF/ERBB2/MTOR/NTRK2	5
BP	GO:0014037	Schwann cell differentiation	3/103	38/18903	0.0011539	0.00321589	0.00127536	AKT1/CDK1/NTRK2	3
BP	GO:0014741	negative regulation of muscle hypertrophy	3/103	38/18903	0.0011539	0.00321589	0.00127536	PPARG/PPARA/G6PD	3
BP	GO:0098926	postsynaptic signal transduction	3/103	38/18903	0.0011539	0.00321589	0.00127536	JAK2/RELA/OPRM1	3
BP	GO:0140448	signaling receptor ligand precursor processing	3/103	38/18903	0.0011539	0.00321589	0.00127536	ACE/CASP1/REN	3
BP	GO:1902229	regulation of intrinsic apoptotic signaling pathway in response to DNA damage	3/103	38/18903	0.0011539	0.00321589	0.00127536	BCL2/SIRT1/BCL2L1	3
BP	GO:1902903	regulation of supramolecular fiber organization	8/103	384/18903	0.00119677	0.00333311	0.00132184	MTOR/GRB2/APP/CDC42/BRAF/ABL1/SNCA/PTK2B	8
BP	GO:0021954	central nervous system neuron development	4/103	85/18903	0.00120014	0.00333791	0.00132375	HSP90AA1/HSP90AB1/NTRK2/DRD2	4
BP	GO:0044774	mitotic DNA integrity checkpoint signaling	4/103	85/18903	0.00120014	0.00333791	0.00132375	CCND1/MDM2/CDK2/CDK1	4
BP	GO:0001990	regulation of systemic arterial blood pressure by hormone	3/103	39/18903	0.00124513	0.00344656	0.00136684	ACE/REN/AGTR1	3
BP	GO:0030279	negative regulation of ossification	3/103	39/18903	0.00124513	0.00344656	0.00136684	BCL2/HIF1A/PTK2B	3
BP	GO:0032728	positive regulation of interferon-beta production	3/103	39/18903	0.00124513	0.00344656	0.00136684	HSP90AA1/TLR4/PTPN11	3
BP	GO:0033028	myeloid cell apoptotic process	3/103	39/18903	0.00124513	0.00344656	0.00136684	IL6/BCL2/SIRT1	3
BP	GO:0042755	eating behavior	3/103	39/18903	0.00124513	0.00344656	0.00136684	STAT3/ACE/OPRM1	3
BP	GO:0071634	regulation of transforming growth factor beta production	3/103	39/18903	0.00124513	0.00344656	0.00136684	HIF1A/HSP90AB1/PTGS2	3
BP	GO:0097242	amyloid-beta clearance	3/103	39/18903	0.00124513	0.00344656	0.00136684	TNF/HDAC1/HMGCR	3
BP	GO:0019319	hexose biosynthetic process	4/103	86/18903	0.00125347	0.00346727	0.00137505	SIRT1/EP300/PPARA/NR3C1	4
BP	GO:0002002	regulation of angiotensin levels in blood	2/103	10/18903	0.00128597	0.00353315	0.00140118	ACE/REN	2
BP	GO:0002676	regulation of chronic inflammatory response	2/103	10/18903	0.00128597	0.00353315	0.00140118	TNF/CYP19A1	2
BP	GO:0010572	positive regulation of platelet activation	2/103	10/18903	0.00128597	0.00353315	0.00140118	TLR4/JAK2	2
BP	GO:0010764	negative regulation of fibroblast migration	2/103	10/18903	0.00128597	0.00353315	0.00140118	FGF2/BRAF	2
BP	GO:0032070	regulation of deoxyribonuclease activity	2/103	10/18903	0.00128597	0.00353315	0.00140118	AKT1/SIRT1	2
BP	GO:0042368	vitamin D biosynthetic process	2/103	10/18903	0.00128597	0.00353315	0.00140118	TNF/CYP3A4	2
BP	GO:0048304	positive regulation of isotype switching to IgG isotypes	2/103	10/18903	0.00128597	0.00353315	0.00140118	IL2/PTPRC	2
BP	GO:0060397	growth hormone receptor signaling pathway via JAK-STAT	2/103	10/18903	0.00128597	0.00353315	0.00140118	STAT3/JAK2	2
BP	GO:0097267	omega-hydroxylase P450 pathway	2/103	10/18903	0.00128597	0.00353315	0.00140118	CYP1A2/CYP2C9	2
BP	GO:1904181	positive regulation of membrane depolarization	2/103	10/18903	0.00128597	0.00353315	0.00140118	KDR/PARP1	2
BP	GO:0043588	skin development	7/103	302/18903	0.00132791	0.00364594	0.00144591	TNF/EGFR/BCL2/CASP3/RELA/EZH2/HDAC1	7
BP	GO:0050866	negative regulation of cell activation	6/103	221/18903	0.00132947	0.00364776	0.00144663	CASP3/ERBB2/IL2/PTPRC/LGALS3/F2	6
BP	GO:0000266	mitochondrial fission	3/103	40/18903	0.00134079	0.00365173	0.0014482	PPARG/KDR/AURKA	3
BP	GO:0032965	regulation of collagen biosynthetic process	3/103	40/18903	0.00134079	0.00365173	0.0014482	IL6/PDGFRB/F2	3
BP	GO:0045740	positive regulation of DNA replication	3/103	40/18903	0.00134079	0.00365173	0.0014482	EGFR/CDK2/CDK1	3
BP	GO:0045923	positive regulation of fatty acid metabolic process	3/103	40/18903	0.00134079	0.00365173	0.0014482	PPARG/PTGS2/PPARA	3
BP	GO:0051154	negative regulation of striated muscle cell differentiation	3/103	40/18903	0.00134079	0.00365173	0.0014482	EZH2/PPARA/G6PD	3
BP	GO:0098751	bone cell development	3/103	40/18903	0.00134079	0.00365173	0.0014482	SRC/EP300/PTPN11	3
BP	GO:0140467	integrated stress response signaling	3/103	40/18903	0.00134079	0.00365173	0.0014482	JUN/HSPA5/NFE2L2	3
BP	GO:1900016	negative regulation of cytokine production involved in inflammatory response	3/103	40/18903	0.00134079	0.00365173	0.0014482	EZH2/PPARA/F2	3
BP	GO:1901532	regulation of hematopoietic progenitor cell differentiation	3/103	40/18903	0.00134079	0.00365173	0.0014482	KDR/ABL1/NFE2L2	3
BP	GO:1904994	regulation of leukocyte adhesion to vascular endothelial cell	3/103	40/18903	0.00134079	0.00365173	0.0014482	TNF/IL6/RELA	3
BP	GO:1990000	amyloid fibril formation	3/103	40/18903	0.00134079	0.00365173	0.0014482	MDM2/APP/SNCA	3
BP	GO:0051607	defense response to virus	7/103	304/18903	0.00137914	0.00375366	0.00148862	IL6/HSP90AA1/BCL2/BCL2L1/RELA/PTPRC/CASP1	7
BP	GO:0140546	defense response to symbiont	7/103	305/18903	0.00140533	0.00382237	0.00151588	IL6/HSP90AA1/BCL2/BCL2L1/RELA/PTPRC/CASP1	7
BP	GO:0019439	aromatic compound catabolic process	9/103	489/18903	0.00140841	0.00382821	0.00151819	AKT1/IL6/MAPK14/PRKCA/MAOA/MAOB/COMT/VCP/XDH	9
BP	GO:0046718	viral entry into host cell	5/103	151/18903	0.00142141	0.00386097	0.00153118	EGFR/ITGB1/CDK1/CTSB/AGTR1	5
BP	GO:0032733	positive regulation of interleukin-10 production	3/103	41/18903	0.00144095	0.00389843	0.00154604	IL6/STAT3/TLR4	3
BP	GO:0045124	regulation of bone resorption	3/103	41/18903	0.00144095	0.00389843	0.00154604	IL6/SRC/PRKCA	3
BP	GO:0060421	positive regulation of heart growth	3/103	41/18903	0.00144095	0.00389843	0.00154604	MAPK14/FGF2/CDK1	3
BP	GO:0070232	regulation of T cell apoptotic process	3/103	41/18903	0.00144095	0.00389843	0.00154604	BCL2/HIF1A/LGALS3	3
BP	GO:0070884	regulation of calcineurin-NFAT signaling cascade	3/103	41/18903	0.00144095	0.00389843	0.00154604	TNF/MTOR/GSK3B	3
BP	GO:2000008	regulation of protein localization to cell surface	3/103	41/18903	0.00144095	0.00389843	0.00154604	AKT1/TNF/HSP90AB1	3
BP	GO:0030072	peptide hormone secretion	6/103	225/18903	0.00145676	0.00393858	0.00156196	TNF/IL6/HIF1A/JAK2/PTPN11/DRD2	6
BP	GO:0051591	response to cAMP	4/103	90/18903	0.00148341	0.00400531	0.00158843	APP/HSPA5/REN/PTK2B	4
BP	GO:2000177	regulation of neural precursor cell proliferation	4/103	90/18903	0.00148341	0.00400531	0.00158843	HIF1A/FGF2/ITGB1/DRD2	4
BP	GO:0016331	morphogenesis of embryonic epithelium	5/103	153/18903	0.00150648	0.0040649	0.00161206	CASP3/HIF1A/PRKACA/ABL1/AR	5
BP	GO:0060070	canonical Wnt signaling pathway	7/103	310/18903	0.00154215	0.00413233	0.0016388	SRC/EGFR/GSK3B/MAPK14/FGF2/HDAC1/VCP	7
BP	GO:0046928	regulation of neurotransmitter secretion	4/103	91/18903	0.00154519	0.00413233	0.0016388	GSK3B/BRAF/SNCA/DRD2	4
BP	GO:0070828	heterochromatin organization	4/103	91/18903	0.00154519	0.00413233	0.0016388	SIRT1/EZH2/HDAC1/CDK2	4
BP	GO:0002714	positive regulation of B cell mediated immunity	3/103	42/18903	0.00154569	0.00413233	0.0016388	TNF/IL2/PTPRC	3
BP	GO:0002891	positive regulation of immunoglobulin mediated immune response	3/103	42/18903	0.00154569	0.00413233	0.0016388	TNF/IL2/PTPRC	3
BP	GO:0010453	regulation of cell fate commitment	3/103	42/18903	0.00154569	0.00413233	0.0016388	FGF2/HDAC1/AR	3
BP	GO:0010591	regulation of lamellipodium assembly	3/103	42/18903	0.00154569	0.00413233	0.0016388	HSP90AA1/MTOR/CDC42	3
BP	GO:0021587	cerebellum morphogenesis	3/103	42/18903	0.00154569	0.00413233	0.0016388	ABL1/PTPN11/HSPA5	3
BP	GO:0032735	positive regulation of interleukin-12 production	3/103	42/18903	0.00154569	0.00413233	0.0016388	TLR4/RELA/MAPK14	3
BP	GO:0045022	early endosome to late endosome transport	3/103	42/18903	0.00154569	0.00413233	0.0016388	SRC/MAPK3/MAPK1	3
BP	GO:0071604	transforming growth factor beta production	3/103	42/18903	0.00154569	0.00413233	0.0016388	HIF1A/HSP90AB1/PTGS2	3
BP	GO:0106056	regulation of calcineurin-mediated signaling	3/103	42/18903	0.00154569	0.00413233	0.0016388	TNF/MTOR/GSK3B	3
BP	GO:2000249	regulation of actin cytoskeleton reorganization	3/103	42/18903	0.00154569	0.00413233	0.0016388	CDC42/ABL1/PTK2B	3
BP	GO:2000403	positive regulation of lymphocyte migration	3/103	42/18903	0.00154569	0.00413233	0.0016388	APP/ABL1/PTK2B	3
BP	GO:0007584	response to nutrient	5/103	154/18903	0.00155039	0.0041408	0.00164216	PPARG/PTGS2/CCND1/MTOR/RXRA	5
BP	GO:0001660	fever generation	2/103	11/18903	0.00156616	0.0041408	0.00164216	TNF/PTGS2	2
BP	GO:0010887	negative regulation of cholesterol storage	2/103	11/18903	0.00156616	0.0041408	0.00164216	PPARG/PPARA	2
BP	GO:0010918	positive regulation of mitochondrial membrane potential	2/103	11/18903	0.00156616	0.0041408	0.00164216	AKT1/VCP	2
BP	GO:0033148	positive regulation of intracellular estrogen receptor signaling pathway	2/103	11/18903	0.00156616	0.0041408	0.00164216	PARP1/AR	2
BP	GO:0033210	leptin-mediated signaling pathway	2/103	11/18903	0.00156616	0.0041408	0.00164216	STAT3/SIRT1	2
BP	GO:0042762	regulation of sulfur metabolic process	2/103	11/18903	0.00156616	0.0041408	0.00164216	NFE2L2/SNCA	2
BP	GO:0045793	positive regulation of cell size	2/103	11/18903	0.00156616	0.0041408	0.00164216	HSP90AA1/HSP90AB1	2
BP	GO:0060439	trachea morphogenesis	2/103	11/18903	0.00156616	0.0041408	0.00164216	MAPK3/MAPK1	2
BP	GO:0061418	regulation of transcription from RNA polymerase II promoter in response to hypoxia	2/103	11/18903	0.00156616	0.0041408	0.00164216	HIF1A/NFE2L2	2
BP	GO:0071394	cellular response to testosterone stimulus	2/103	11/18903	0.00156616	0.0041408	0.00164216	SIRT1/AR	2
BP	GO:0071803	positive regulation of podosome assembly	2/103	11/18903	0.00156616	0.0041408	0.00164216	TNF/SRC	2
BP	GO:0071872	cellular response to epinephrine stimulus	2/103	11/18903	0.00156616	0.0041408	0.00164216	PRKACA/SNCA	2
BP	GO:0086100	endothelin receptor signaling pathway	2/103	11/18903	0.00156616	0.0041408	0.00164216	CDC42/PTK2B	2
BP	GO:1900222	negative regulation of amyloid-beta clearance	2/103	11/18903	0.00156616	0.0041408	0.00164216	TNF/HMGCR	2
BP	GO:1901731	positive regulation of platelet aggregation	2/103	11/18903	0.00156616	0.0041408	0.00164216	IL6/JAK2	2
BP	GO:1901856	negative regulation of cellular respiration	2/103	11/18903	0.00156616	0.0041408	0.00164216	TNF/SNCA	2
BP	GO:0035148	tube formation	5/103	155/18903	0.00159524	0.00421223	0.00167048	CASP3/HIF1A/PRKACA/FGF2/ABL1	5
BP	GO:0050871	positive regulation of B cell activation	5/103	155/18903	0.00159524	0.00421223	0.00167048	IL6/BCL2/TLR4/IL2/PTPRC	5
BP	GO:0032273	positive regulation of protein polymerization	4/103	92/18903	0.00160874	0.00424511	0.00168353	HSP90AA1/MTOR/GRB2/PTK2B	4
BP	GO:0002790	peptide secretion	6/103	230/18903	0.00162872	0.00429504	0.00170333	TNF/IL6/HIF1A/JAK2/PTPN11/DRD2	6
BP	GO:0007595	lactation	3/103	43/18903	0.00165508	0.00435892	0.00172866	HIF1A/CCND1/XDH	3
BP	GO:0042789	mRNA transcription by RNA polymerase II	3/103	43/18903	0.00165508	0.00435892	0.00172866	STAT3/PPARG/RXRA	3
BP	GO:0006835	dicarboxylic acid transport	4/103	93/18903	0.00167409	0.00440042	0.00174512	TNF/ITGB1/SNCA/NTRK2	4
BP	GO:0044070	regulation of anion transport	4/103	93/18903	0.00167409	0.00440042	0.00174512	TNF/ITGB1/ABCB1/SNCA	4
BP	GO:0045814	negative regulation of gene expression, epigenetic	4/103	93/18903	0.00167409	0.00440042	0.00174512	SIRT1/EZH2/HDAC1/CDK2	4
BP	GO:0060348	bone development	6/103	233/18903	0.00173906	0.00456825	0.00181168	SRC/EP300/KDR/PTPRC/MAPK14/PTPN11	6
BP	GO:0051492	regulation of stress fiber assembly	4/103	94/18903	0.00174125	0.00457107	0.0018128	MTOR/CDC42/BRAF/ABL1	4
BP	GO:0001504	neurotransmitter uptake	3/103	44/18903	0.0017692	0.00462653	0.00183479	ITGB1/SNCA/DRD2	3
BP	GO:0014075	response to amine	3/103	44/18903	0.0017692	0.00462653	0.00183479	JAK2/CDK1/DRD2	3
BP	GO:0042771	intrinsic apoptotic signaling pathway in response to DNA damage by p53 class mediator	3/103	44/18903	0.0017692	0.00462653	0.00183479	BCL2/SIRT1/EP300	3
BP	GO:0045840	positive regulation of mitotic nuclear division	3/103	44/18903	0.0017692	0.00462653	0.00183479	TNF/PDGFRB/AURKA	3
BP	GO:0046640	regulation of alpha-beta T cell proliferation	3/103	44/18903	0.0017692	0.00462653	0.00183479	JAK2/IL2/PTPRC	3
BP	GO:1900026	positive regulation of substrate adhesion-dependent cell spreading	3/103	44/18903	0.0017692	0.00462653	0.00183479	CDC42/BRAF/ABL1	3
BP	GO:0030198	extracellular matrix organization	7/103	318/18903	0.00178248	0.00465826	0.00184737	TNF/IL6/MMP9/APP/ABL1/ITGB1/CTSS	7
BP	GO:0042982	amyloid precursor protein metabolic process	4/103	95/18903	0.00181027	0.00472785	0.00187497	TNF/CASP3/RELA/NTRK2	4
BP	GO:0043062	extracellular structure organization	7/103	319/18903	0.00181446	0.00473575	0.0018781	TNF/IL6/MMP9/APP/ABL1/ITGB1/CTSS	7
BP	GO:0000012	single strand break repair	2/103	12/18903	0.00187272	0.00481979	0.00191143	SIRT1/PARP1	2
BP	GO:0006983	ER overload response	2/103	12/18903	0.00187272	0.00481979	0.00191143	GSK3B/HSPA5	2
BP	GO:0014842	regulation of skeletal muscle satellite cell proliferation	2/103	12/18903	0.00187272	0.00481979	0.00191143	JAK2/FGF2	2
BP	GO:0031650	regulation of heat generation	2/103	12/18903	0.00187272	0.00481979	0.00191143	TNF/PTGS2	2
BP	GO:0031953	negative regulation of protein autophosphorylation	2/103	12/18903	0.00187272	0.00481979	0.00191143	JUN/PTPRC	2
BP	GO:0033145	positive regulation of intracellular steroid hormone receptor signaling pathway	2/103	12/18903	0.00187272	0.00481979	0.00191143	PARP1/AR	2
BP	GO:0033327	Leydig cell differentiation	2/103	12/18903	0.00187272	0.00481979	0.00191143	CCND1/AR	2
BP	GO:0042447	hormone catabolic process	2/103	12/18903	0.00187272	0.00481979	0.00191143	ACE/CYP19A1	2
BP	GO:0042756	drinking behavior	2/103	12/18903	0.00187272	0.00481979	0.00191143	REN/DRD2	2
BP	GO:0051549	positive regulation of keratinocyte migration	2/103	12/18903	0.00187272	0.00481979	0.00191143	MMP9/MTOR	2
BP	GO:0051583	dopamine uptake involved in synaptic transmission	2/103	12/18903	0.00187272	0.00481979	0.00191143	SNCA/DRD2	2
BP	GO:0051934	catecholamine uptake involved in synaptic transmission	2/103	12/18903	0.00187272	0.00481979	0.00191143	SNCA/DRD2	2
BP	GO:0060123	regulation of growth hormone secretion	2/103	12/18903	0.00187272	0.00481979	0.00191143	PTPN11/DRD2	2
BP	GO:0061517	macrophage proliferation	2/103	12/18903	0.00187272	0.00481979	0.00191143	MAPK3/MAPK1	2
BP	GO:0070417	cellular response to cold	2/103	12/18903	0.00187272	0.00481979	0.00191143	NFKBIA/PRKACA	2
BP	GO:0140052	cellular response to oxidised low-density lipoprotein particle stimulus	2/103	12/18903	0.00187272	0.00481979	0.00191143	AKT1/TLR4	2
BP	GO:1900272	negative regulation of long-term synaptic potentiation	2/103	12/18903	0.00187272	0.00481979	0.00191143	APP/ABL1	2
BP	GO:1901030	positive regulation of mitochondrial outer membrane permeabilization involved in apoptotic signaling pathway	2/103	12/18903	0.00187272	0.00481979	0.00191143	GSK3B/MAPK8	2
BP	GO:1902950	regulation of dendritic spine maintenance	2/103	12/18903	0.00187272	0.00481979	0.00191143	FYN/GRIN2B	2
BP	GO:1903800	positive regulation of miRNA maturation	2/103	12/18903	0.00187272	0.00481979	0.00191143	IL6/EGFR	2
BP	GO:1904177	regulation of adipose tissue development	2/103	12/18903	0.00187272	0.00481979	0.00191143	PPARG/SIRT1	2
BP	GO:2001223	negative regulation of neuron migration	2/103	12/18903	0.00187272	0.00481979	0.00191143	STAT3/DRD2	2
BP	GO:0045229	external encapsulating structure organization	7/103	321/18903	0.00187976	0.00482889	0.00191504	TNF/IL6/MMP9/APP/ABL1/ITGB1/CTSS	7
BP	GO:0014033	neural crest cell differentiation	4/103	96/18903	0.00188116	0.00482889	0.00191504	HIF1A/MAPK3/MAPK1/CDC42	4
BP	GO:0046330	positive regulation of JNK cascade	4/103	96/18903	0.00188116	0.00482889	0.00191504	TNF/TLR4/APP/PTK2B	4
BP	GO:1903321	negative regulation of protein modification by small protein conjugation or removal	4/103	96/18903	0.00188116	0.00482889	0.00191504	AKT1/RELA/ABL1/FYN	4
BP	GO:0010799	regulation of peptidyl-threonine phosphorylation	3/103	45/18903	0.00188812	0.00482889	0.00191504	MAPK1/APP/CALM1	3
BP	GO:0021575	hindbrain morphogenesis	3/103	45/18903	0.00188812	0.00482889	0.00191504	ABL1/PTPN11/HSPA5	3
BP	GO:0048512	circadian behavior	3/103	45/18903	0.00188812	0.00482889	0.00191504	MTOR/PARP1/DRD2	3
BP	GO:0051955	regulation of amino acid transport	3/103	45/18903	0.00188812	0.00482889	0.00191504	TNF/ITGB1/SNCA	3
BP	GO:0071827	plasma lipoprotein particle organization	3/103	45/18903	0.00188812	0.00482889	0.00191504	PRKACA/MPO/AGTR1	3
BP	GO:0098927	vesicle-mediated transport between endosomal compartments	3/103	45/18903	0.00188812	0.00482889	0.00191504	SRC/MAPK3/MAPK1	3
BP	GO:0002690	positive regulation of leukocyte chemotaxis	4/103	97/18903	0.00195396	0.00499099	0.00197933	IL6/MAPK3/MAPK1/PTK2B	4
BP	GO:0008593	regulation of Notch signaling pathway	4/103	97/18903	0.00195396	0.00499099	0.00197933	AKT1/SRC/STAT3/NFKBIA	4
BP	GO:0040029	epigenetic regulation of gene expression	5/103	163/18903	0.00198915	0.0050777	0.00201372	SIRT1/EP300/EZH2/HDAC1/CDK2	5
BP	GO:0010830	regulation of myotube differentiation	3/103	46/18903	0.00201191	0.00512616	0.00203293	BCL2/MTOR/MAPK14	3
BP	GO:0033173	calcineurin-NFAT signaling cascade	3/103	46/18903	0.00201191	0.00512616	0.00203293	TNF/MTOR/GSK3B	3
BP	GO:0070266	necroptotic process	3/103	46/18903	0.00201191	0.00512616	0.00203293	TNF/PARP1/CASP8	3
BP	GO:0030595	leukocyte chemotaxis	6/103	240/18903	0.00201858	0.00513671	0.00203712	IL6/MAPK3/MAPK1/LGALS3/CYP19A1/PTK2B	6
BP	GO:0045333	cellular respiration	6/103	240/18903	0.00201858	0.00513671	0.00203712	TNF/HIF1A/CDK1/SNCA/VCP/CYP1A2	6
BP	GO:0014020	primary neural tube formation	4/103	98/18903	0.00202868	0.00515596	0.00204475	CASP3/HIF1A/PRKACA/ABL1	4
BP	GO:0051952	regulation of amine transport	4/103	98/18903	0.00202868	0.00515596	0.00204475	TNF/ITGB1/SNCA/DRD2	4
BP	GO:0097529	myeloid leukocyte migration	6/103	242/18903	0.00210436	0.00534416	0.00211939	IL6/MAPK3/MAPK1/LGALS3/CYP19A1/PTK2B	6
BP	GO:0030101	natural killer cell activation	4/103	99/18903	0.00210535	0.00534416	0.00211939	JAK2/IL2/PTPRC/CASP8	4
BP	GO:0006984	ER-nucleus signaling pathway	3/103	47/18903	0.00214065	0.00541348	0.00214688	GSK3B/HSPA5/NFE2L2	3
BP	GO:0007622	rhythmic behavior	3/103	47/18903	0.00214065	0.00541348	0.00214688	MTOR/PARP1/DRD2	3
BP	GO:0031018	endocrine pancreas development	3/103	47/18903	0.00214065	0.00541348	0.00214688	AKT1/IL6/GSK3B	3
BP	GO:0045646	regulation of erythrocyte differentiation	3/103	47/18903	0.00214065	0.00541348	0.00214688	STAT3/HIF1A/MAPK14	3
BP	GO:0046633	alpha-beta T cell proliferation	3/103	47/18903	0.00214065	0.00541348	0.00214688	JAK2/IL2/PTPRC	3
BP	GO:0090199	regulation of release of cytochrome c from mitochondria	3/103	47/18903	0.00214065	0.00541348	0.00214688	AKT1/MMP9/BCL2L1	3
BP	GO:0019080	viral gene expression	4/103	100/18903	0.00218401	0.00551628	0.00218765	JUN/GSK3B/EP300/HDAC1	4
BP	GO:0048709	oligodendrocyte differentiation	4/103	100/18903	0.00218401	0.00551628	0.00218765	ERBB2/MTOR/HDAC1/NTRK2	4
BP	GO:0031392	regulation of prostaglandin biosynthetic process	2/103	13/18903	0.00220536	0.00552903	0.0021927	PTGS2/SIRT1	2
BP	GO:0032494	response to peptidoglycan	2/103	13/18903	0.00220536	0.00552903	0.0021927	IL6/RELA	2
BP	GO:0034616	response to laminar fluid shear stress	2/103	13/18903	0.00220536	0.00552903	0.0021927	ACE/NFE2L2	2
BP	GO:0042362	fat-soluble vitamin biosynthetic process	2/103	13/18903	0.00220536	0.00552903	0.0021927	TNF/CYP3A4	2
BP	GO:0051481	negative regulation of cytosolic calcium ion concentration	2/103	13/18903	0.00220536	0.00552903	0.0021927	BCL2/DRD2	2
BP	GO:0060221	retinal rod cell differentiation	2/103	13/18903	0.00220536	0.00552903	0.0021927	STAT3/NTRK2	2
BP	GO:0061052	negative regulation of cell growth involved in cardiac muscle cell development	2/103	13/18903	0.00220536	0.00552903	0.0021927	PPARA/G6PD	2
BP	GO:0070932	histone H3 deacetylation	2/103	13/18903	0.00220536	0.00552903	0.0021927	SIRT1/HDAC1	2
BP	GO:0071287	cellular response to manganese ion	2/103	13/18903	0.00220536	0.00552903	0.0021927	APP/HSPA5	2
BP	GO:0097048	dendritic cell apoptotic process	2/103	13/18903	0.00220536	0.00552903	0.0021927	BCL2/BCL2L1	2
BP	GO:1903961	positive regulation of anion transmembrane transport	2/103	13/18903	0.00220536	0.00552903	0.0021927	ITGB1/ABCB1	2
BP	GO:2000668	regulation of dendritic cell apoptotic process	2/103	13/18903	0.00220536	0.00552903	0.0021927	BCL2/BCL2L1	2
BP	GO:0021549	cerebellum development	4/103	101/18903	0.00226467	0.00566369	0.00224611	EZH2/ABL1/PTPN11/HSPA5	4
BP	GO:0032204	regulation of telomere maintenance	4/103	101/18903	0.00226467	0.00566369	0.00224611	SRC/MAPK3/MAPK1/PARP1	4
BP	GO:0002673	regulation of acute inflammatory response	3/103	48/18903	0.00227438	0.00566369	0.00224611	TNF/IL6/PTGS2	3
BP	GO:0009299	mRNA transcription	3/103	48/18903	0.00227438	0.00566369	0.00224611	STAT3/PPARG/RXRA	3
BP	GO:0010171	body morphogenesis	3/103	48/18903	0.00227438	0.00566369	0.00224611	EP300/BRAF/PTPN11	3
BP	GO:0031641	regulation of myelination	3/103	48/18903	0.00227438	0.00566369	0.00224611	AKT1/TNF/MTOR	3
BP	GO:0032309	icosanoid secretion	3/103	48/18903	0.00227438	0.00566369	0.00224611	PTGS2/ACE/DRD2	3
BP	GO:0035305	negative regulation of dephosphorylation	3/103	48/18903	0.00227438	0.00566369	0.00224611	TNF/GSK3B/LGALS3	3
BP	GO:0046850	regulation of bone remodeling	3/103	48/18903	0.00227438	0.00566369	0.00224611	IL6/SRC/PRKCA	3
BP	GO:0060976	coronary vasculature development	3/103	48/18903	0.00227438	0.00566369	0.00224611	FGF2/ACE/PDGFRB	3
BP	GO:0071825	protein-lipid complex subunit organization	3/103	48/18903	0.00227438	0.00566369	0.00224611	PRKACA/MPO/AGTR1	3
BP	GO:0001837	epithelial to mesenchymal transition	5/103	169/18903	0.00232812	0.00579395	0.00229776	IL6/HIF1A/MTOR/GSK3B/EZH2	5
BP	GO:0031341	regulation of cell killing	4/103	102/18903	0.00234736	0.00583827	0.00231534	HSP90AB1/BCL2L1/PTPRC/MAPK8	4
BP	GO:0030041	actin filament polymerization	5/103	170/18903	0.00238845	0.00593685	0.00235444	MTOR/JAK2/GRB2/ABL1/PTK2B	5
BP	GO:0043330	response to exogenous dsRNA	3/103	49/18903	0.0024132	0.00598738	0.00237448	MAPK3/MAPK1/NFKBIA	3
BP	GO:0048546	digestive tract morphogenesis	3/103	49/18903	0.0024132	0.00598738	0.00237448	EGFR/BCL2/HIF1A	3
BP	GO:0070509	calcium ion import	3/103	49/18903	0.0024132	0.00598738	0.00237448	ACE/PDGFRB/LGALS3	3
BP	GO:0016042	lipid catabolic process	7/103	336/18903	0.00242962	0.00602329	0.00238872	AKT1/TNF/CDK4/PPARA/CYP3A4/CYP19A1/CYP1A2	7
BP	GO:0048477	oogenesis	4/103	103/18903	0.00243211	0.00602329	0.00238872	SRC/BCL2/AURKA/PTK2B	4
BP	GO:0070167	regulation of biomineral tissue development	4/103	103/18903	0.00243211	0.00602329	0.00238872	HIF1A/RXRA/PTK2B/ADRB2	4
BP	GO:1990778	protein localization to cell periphery	7/103	337/18903	0.00247027	0.00611406	0.00242471	AKT1/TNF/EGFR/BCL2L1/AR/ITGB1/LGALS3	7
BP	GO:0051963	regulation of synapse assembly	4/103	104/18903	0.00251894	0.00622697	0.00246949	APP/NTRK1/SNCA/NTRK2	4
BP	GO:0110020	regulation of actomyosin structure organization	4/103	104/18903	0.00251894	0.00622697	0.00246949	MTOR/CDC42/BRAF/ABL1	4
BP	GO:0006692	prostanoid metabolic process	3/103	50/18903	0.00255715	0.006258	0.0024818	PTGS2/SIRT1/PTGS1	3
BP	GO:0006693	prostaglandin metabolic process	3/103	50/18903	0.00255715	0.006258	0.0024818	PTGS2/SIRT1/PTGS1	3
BP	GO:0021695	cerebellar cortex development	3/103	50/18903	0.00255715	0.006258	0.0024818	EZH2/PTPN11/HSPA5	3
BP	GO:0032964	collagen biosynthetic process	3/103	50/18903	0.00255715	0.006258	0.0024818	IL6/PDGFRB/F2	3
BP	GO:0038084	vascular endothelial growth factor signaling pathway	3/103	50/18903	0.00255715	0.006258	0.0024818	KDR/PDGFRB/XDH	3
BP	GO:0060043	regulation of cardiac muscle cell proliferation	3/103	50/18903	0.00255715	0.006258	0.0024818	MAPK14/FGF2/CDK1	3
BP	GO:1902041	regulation of extrinsic apoptotic signaling pathway via death domain receptors	3/103	50/18903	0.00255715	0.006258	0.0024818	GSK3B/BCL2L1/LGALS3	3
BP	GO:0014841	skeletal muscle satellite cell proliferation	2/103	14/18903	0.00256379	0.006258	0.0024818	JAK2/FGF2	2
BP	GO:0030252	growth hormone secretion	2/103	14/18903	0.00256379	0.006258	0.0024818	PTPN11/DRD2	2
BP	GO:0031958	corticosteroid receptor signaling pathway	2/103	14/18903	0.00256379	0.006258	0.0024818	JAK2/NR3C1	2
BP	GO:0043922	negative regulation by host of viral transcription	2/103	14/18903	0.00256379	0.006258	0.0024818	JUN/HDAC1	2
BP	GO:0045820	negative regulation of glycolytic process	2/103	14/18903	0.00256379	0.006258	0.0024818	STAT3/PPARA	2
BP	GO:0047484	regulation of response to osmotic stress	2/103	14/18903	0.00256379	0.006258	0.0024818	PTGS2/ABCB1	2
BP	GO:0048302	regulation of isotype switching to IgG isotypes	2/103	14/18903	0.00256379	0.006258	0.0024818	IL2/PTPRC	2
BP	GO:0051547	regulation of keratinocyte migration	2/103	14/18903	0.00256379	0.006258	0.0024818	MMP9/MTOR	2
BP	GO:0071801	regulation of podosome assembly	2/103	14/18903	0.00256379	0.006258	0.0024818	TNF/SRC	2
BP	GO:0072540	T-helper 17 cell lineage commitment	2/103	14/18903	0.00256379	0.006258	0.0024818	IL6/STAT3	2
BP	GO:0098814	spontaneous synaptic transmission	2/103	14/18903	0.00256379	0.006258	0.0024818	APP/ITGB1	2
BP	GO:1902947	regulation of tau-protein kinase activity	2/103	14/18903	0.00256379	0.006258	0.0024818	HSP90AA1/HSP90AB1	2
BP	GO:1904044	response to aldosterone	2/103	14/18903	0.00256379	0.006258	0.0024818	PARP1/ACE	2
BP	GO:2001171	positive regulation of ATP biosynthetic process	2/103	14/18903	0.00256379	0.006258	0.0024818	PPARA/VCP	2
BP	GO:0032886	regulation of microtubule-based process	6/103	252/18903	0.00257533	0.00627863	0.00248998	ERBB2/GSK3B/SIRT1/ABL1/AURKA/SNCA	6
BP	GO:0098657	import into cell	6/103	252/18903	0.00257533	0.00627863	0.00248998	AKT1/TNF/ITGB1/FYN/SNCA/DRD2	6
BP	GO:0032479	regulation of type I interferon production	4/103	105/18903	0.00260788	0.00634658	0.00251693	GAPDH/HSP90AA1/TLR4/PTPN11	4
BP	GO:0032606	type I interferon production	4/103	105/18903	0.00260788	0.00634658	0.00251693	GAPDH/HSP90AA1/TLR4/PTPN11	4
BP	GO:0110149	regulation of biomineralization	4/103	105/18903	0.00260788	0.00634658	0.00251693	HIF1A/RXRA/PTK2B/ADRB2	4
BP	GO:0006937	regulation of muscle contraction	5/103	174/18903	0.00264123	0.00642389	0.00254759	HSP90AA1/PTGS2/PRKACA/ADRB2/CALM1	5
BP	GO:0015833	peptide transport	6/103	254/18903	0.00267833	0.00651023	0.00258183	TNF/IL6/HIF1A/JAK2/PTPN11/DRD2	6
BP	GO:0001841	neural tube formation	4/103	106/18903	0.00269896	0.00653918	0.00259331	CASP3/HIF1A/PRKACA/ABL1	4
BP	GO:0015837	amine transport	4/103	106/18903	0.00269896	0.00653918	0.00259331	TNF/ITGB1/SNCA/DRD2	4
BP	GO:0042102	positive regulation of T cell proliferation	4/103	106/18903	0.00269896	0.00653918	0.00259331	IL6/JAK2/IL2/PTPRC	4
BP	GO:1901890	positive regulation of cell junction assembly	4/103	106/18903	0.00269896	0.00653918	0.00259331	KDR/ABL1/NTRK1/NTRK2	4
BP	GO:0019083	viral transcription	3/103	51/18903	0.00270631	0.00653918	0.00259331	JUN/EP300/HDAC1	3
BP	GO:0030850	prostate gland development	3/103	51/18903	0.00270631	0.00653918	0.00259331	ESR1/AR/CYP19A1	3
BP	GO:0050982	detection of mechanical stimulus	3/103	51/18903	0.00270631	0.00653918	0.00259331	TNF/FYN/NTRK1	3
BP	GO:0097720	calcineurin-mediated signaling	3/103	51/18903	0.00270631	0.00653918	0.00259331	TNF/MTOR/GSK3B	3
BP	GO:0101023	vascular endothelial cell proliferation	3/103	51/18903	0.00270631	0.00653918	0.00259331	STAT3/PPARG/FGF2	3
BP	GO:1905562	regulation of vascular endothelial cell proliferation	3/103	51/18903	0.00270631	0.00653918	0.00259331	STAT3/PPARG/FGF2	3
BP	GO:0050680	negative regulation of epithelial cell proliferation	5/103	176/18903	0.00277465	0.00670032	0.00265721	TNF/PPARG/AR/DRD2/XDH	5
BP	GO:0001764	neuron migration	5/103	177/18903	0.00284316	0.00686169	0.00272121	STAT3/HSP90AA1/FYN/NTRK2/DRD2	5
BP	GO:0006636	unsaturated fatty acid biosynthetic process	3/103	52/18903	0.00286073	0.00688369	0.00272993	PTGS2/SIRT1/PTGS1	3
BP	GO:0006968	cellular defense response	3/103	52/18903	0.00286073	0.00688369	0.00272993	RELA/ITGB1/PTK2B	3
BP	GO:0010823	negative regulation of mitochondrion organization	3/103	52/18903	0.00286073	0.00688369	0.00272993	AKT1/PPARG/BCL2L1	3
BP	GO:0043392	negative regulation of DNA binding	3/103	52/18903	0.00286073	0.00688369	0.00272993	JUN/JAK2/NFKBIA	3
BP	GO:0060612	adipose tissue development	3/103	52/18903	0.00286073	0.00688369	0.00272993	PPARG/SIRT1/CDK4	3
BP	GO:0032231	regulation of actin filament bundle assembly	4/103	108/18903	0.00288761	0.00694016	0.00275233	MTOR/CDC42/BRAF/ABL1	4
BP	GO:0090263	positive regulation of canonical Wnt signaling pathway	4/103	108/18903	0.00288761	0.00694016	0.00275233	SRC/EGFR/FGF2/VCP	4
BP	GO:0002903	negative regulation of B cell apoptotic process	2/103	15/18903	0.00294774	0.00700604	0.00277846	BCL2/IL2	2
BP	GO:0006206	pyrimidine nucleobase metabolic process	2/103	15/18903	0.00294774	0.00700604	0.00277846	MTOR/MAPK1	2
BP	GO:0010889	regulation of sequestering of triglyceride	2/103	15/18903	0.00294774	0.00700604	0.00277846	PPARG/PPARA	2
BP	GO:0014857	regulation of skeletal muscle cell proliferation	2/103	15/18903	0.00294774	0.00700604	0.00277846	JAK2/FGF2	2
BP	GO:0032488	Cdc42 protein signal transduction	2/103	15/18903	0.00294774	0.00700604	0.00277846	CDC42/ABL1	2
BP	GO:0038166	angiotensin-activated signaling pathway	2/103	15/18903	0.00294774	0.00700604	0.00277846	SRC/AGTR1	2
BP	GO:0042976	activation of Janus kinase activity	2/103	15/18903	0.00294774	0.00700604	0.00277846	JAK2/PTK2B	2
BP	GO:0043518	negative regulation of DNA damage response, signal transduction by p53 class mediator	2/103	15/18903	0.00294774	0.00700604	0.00277846	SIRT1/MDM2	2
BP	GO:0048291	isotype switching to IgG isotypes	2/103	15/18903	0.00294774	0.00700604	0.00277846	IL2/PTPRC	2
BP	GO:0051589	negative regulation of neurotransmitter transport	2/103	15/18903	0.00294774	0.00700604	0.00277846	BRAF/SNCA	2
BP	GO:0060576	intestinal epithelial cell development	2/103	15/18903	0.00294774	0.00700604	0.00277846	SRC/HIF1A	2
BP	GO:0060766	negative regulation of androgen receptor signaling pathway	2/103	15/18903	0.00294774	0.00700604	0.00277846	SIRT1/HDAC1	2
BP	GO:0070885	negative regulation of calcineurin-NFAT signaling cascade	2/103	15/18903	0.00294774	0.00700604	0.00277846	MTOR/GSK3B	2
BP	GO:0090280	positive regulation of calcium ion import	2/103	15/18903	0.00294774	0.00700604	0.00277846	PDGFRB/LGALS3	2
BP	GO:0106057	negative regulation of calcineurin-mediated signaling	2/103	15/18903	0.00294774	0.00700604	0.00277846	MTOR/GSK3B	2
BP	GO:0106070	regulation of adenylate cyclase-activating G protein-coupled receptor signaling pathway	2/103	15/18903	0.00294774	0.00700604	0.00277846	PRKCA/OPRM1	2
BP	GO:1902166	negative regulation of intrinsic apoptotic signaling pathway in response to DNA damage by p53 class mediator	2/103	15/18903	0.00294774	0.00700604	0.00277846	BCL2/SIRT1	2
BP	GO:2001028	positive regulation of endothelial cell chemotaxis	2/103	15/18903	0.00294774	0.00700604	0.00277846	KDR/FGF2	2
BP	GO:2001279	regulation of unsaturated fatty acid biosynthetic process	2/103	15/18903	0.00294774	0.00700604	0.00277846	PTGS2/SIRT1	2
BP	GO:0045580	regulation of T cell differentiation	5/103	179/18903	0.00298384	0.00708276	0.00280888	ERBB2/IL2/PTPRC/BRAF/ABL1	5
BP	GO:0001708	cell fate specification	4/103	109/18903	0.00298524	0.00708276	0.00280888	FGF2/HDAC1/AR/ITGB1	4
BP	GO:1904063	negative regulation of cation transmembrane transport	4/103	109/18903	0.00298524	0.00708276	0.00280888	BCL2/MMP9/DRD2/CALM1	4
BP	GO:0002639	positive regulation of immunoglobulin production	3/103	53/18903	0.00302048	0.00714139	0.00283213	IL6/IL2/PTPRC	3
BP	GO:0010656	negative regulation of muscle cell apoptotic process	3/103	53/18903	0.00302048	0.00714139	0.00283213	JAK2/NFE2L2/PTK2B	3
BP	GO:0030838	positive regulation of actin filament polymerization	3/103	53/18903	0.00302048	0.00714139	0.00283213	MTOR/GRB2/PTK2B	3
BP	GO:0032210	regulation of telomere maintenance via telomerase	3/103	53/18903	0.00302048	0.00714139	0.00283213	SRC/MAPK3/MAPK1	3
BP	GO:0051155	positive regulation of striated muscle cell differentiation	3/103	53/18903	0.00302048	0.00714139	0.00283213	BCL2/MTOR/MAPK14	3
BP	GO:0097300	programmed necrotic cell death	3/103	53/18903	0.00302048	0.00714139	0.00283213	TNF/PARP1/CASP8	3
BP	GO:0002699	positive regulation of immune effector process	6/103	261/18903	0.00306334	0.00723851	0.00287065	TNF/IL6/TLR4/SIRT1/IL2/PTPRC	6
BP	GO:0006941	striated muscle contraction	5/103	181/18903	0.0031295	0.00738627	0.00292925	TNF/HSP90AA1/MTOR/PRKACA/CALM1	5
BP	GO:0043409	negative regulation of MAPK cascade	5/103	181/18903	0.0031295	0.00738627	0.00292925	PPARG/TLR4/PTPRC/ABL1/HMGCR	5
BP	GO:0014009	glial cell proliferation	3/103	54/18903	0.00318561	0.00748344	0.00296778	TNF/IL6/PTK2B	3
BP	GO:0045778	positive regulation of ossification	3/103	54/18903	0.00318561	0.00748344	0.00296778	PTPN11/RXRA/ADRB2	3
BP	GO:0071168	protein localization to chromatin	3/103	54/18903	0.00318561	0.00748344	0.00296778	ESR1/EZH2/VCP	3
BP	GO:0072698	protein localization to microtubule cytoskeleton	3/103	54/18903	0.00318561	0.00748344	0.00296778	GSK3B/ABL1/AURKA	3
BP	GO:0016079	synaptic vesicle exocytosis	4/103	111/18903	0.00318722	0.00748344	0.00296778	GSK3B/BRAF/SNCA/DRD2	4
BP	GO:0031532	actin cytoskeleton reorganization	4/103	111/18903	0.00318722	0.00748344	0.00296778	GRB2/CDC42/ABL1/PTK2B	4
BP	GO:0034446	substrate adhesion-dependent cell spreading	4/103	111/18903	0.00318722	0.00748344	0.00296778	SRC/CDC42/BRAF/ABL1	4
BP	GO:0071347	cellular response to interleukin-1	4/103	111/18903	0.00318722	0.00748344	0.00296778	IL6/HIF1A/MAPK3/RELA	4
BP	GO:0120034	positive regulation of plasma membrane bounded cell projection assembly	4/103	111/18903	0.00318722	0.00748344	0.00296778	HSP90AA1/MTOR/GSK3B/CDC42	4
BP	GO:0002822	regulation of adaptive immune response based on somatic recombination of immune receptors built from immunoglobulin superfamily domains	5/103	182/18903	0.00320422	0.00751901	0.00298189	TNF/IL6/JAK2/IL2/PTPRC	5
BP	GO:0007219	Notch signaling pathway	5/103	183/18903	0.00328022	0.00768848	0.0030491	AKT1/SRC/STAT3/NFKBIA/APP	5
BP	GO:0008361	regulation of cell size	5/103	183/18903	0.00328022	0.00768848	0.0030491	HSP90AA1/HSP90AB1/MTOR/GSK3B/ABL1	5
BP	GO:0002931	response to ischemia	3/103	55/18903	0.00335618	0.00775792	0.00307664	BCL2/CASP9/PTK2B	3
BP	GO:0010659	cardiac muscle cell apoptotic process	3/103	55/18903	0.00335618	0.00775792	0.00307664	HSP90AA1/JAK2/NFE2L2	3
BP	GO:0043647	inositol phosphate metabolic process	3/103	55/18903	0.00335618	0.00775792	0.00307664	FGF2/SNCA/PTK2B	3
BP	GO:0055078	sodium ion homeostasis	3/103	55/18903	0.00335618	0.00775792	0.00307664	ACE/AGTR1/DRD2	3
BP	GO:0071385	cellular response to glucocorticoid stimulus	3/103	55/18903	0.00335618	0.00775792	0.00307664	JAK2/CASP9/NR3C1	3
BP	GO:2000772	regulation of cellular senescence	3/103	55/18903	0.00335618	0.00775792	0.00307664	SIRT1/ABL1/TERT	3
BP	GO:0010919	regulation of inositol phosphate biosynthetic process	2/103	16/18903	0.00335691	0.00775792	0.00307664	SNCA/PTK2B	2
BP	GO:0021984	adenohypophysis development	2/103	16/18903	0.00335691	0.00775792	0.00307664	FGF2/DRD2	2
BP	GO:0031053	primary miRNA processing	2/103	16/18903	0.00335691	0.00775792	0.00307664	IL6/STAT3	2
BP	GO:0032095	regulation of response to food	2/103	16/18903	0.00335691	0.00775792	0.00307664	PPARA/OPRM1	2
BP	GO:0034112	positive regulation of homotypic cell-cell adhesion	2/103	16/18903	0.00335691	0.00775792	0.00307664	IL6/JAK2	2
BP	GO:0034374	low-density lipoprotein particle remodeling	2/103	16/18903	0.00335691	0.00775792	0.00307664	MPO/AGTR1	2
BP	GO:0045187	regulation of circadian sleep/wake cycle, sleep	2/103	16/18903	0.00335691	0.00775792	0.00307664	PARP1/DRD2	2
BP	GO:0045651	positive regulation of macrophage differentiation	2/103	16/18903	0.00335691	0.00775792	0.00307664	CASP8/PRKCA	2
BP	GO:0045838	positive regulation of membrane potential	2/103	16/18903	0.00335691	0.00775792	0.00307664	AKT1/VCP	2
BP	GO:0045986	negative regulation of smooth muscle contraction	2/103	16/18903	0.00335691	0.00775792	0.00307664	PTGS2/ADRB2	2
BP	GO:0046325	negative regulation of glucose import	2/103	16/18903	0.00335691	0.00775792	0.00307664	TNF/ACE	2
BP	GO:0050872	white fat cell differentiation	2/103	16/18903	0.00335691	0.00775792	0.00307664	PPARG/SIRT1	2
BP	GO:0061684	chaperone-mediated autophagy	2/103	16/18903	0.00335691	0.00775792	0.00307664	HSP90AA1/SNCA	2
BP	GO:0071391	cellular response to estrogen stimulus	2/103	16/18903	0.00335691	0.00775792	0.00307664	ESR1/AR	2
BP	GO:0090336	positive regulation of brown fat cell differentiation	2/103	16/18903	0.00335691	0.00775792	0.00307664	PTGS2/MAPK14	2
BP	GO:2001212	regulation of vasculogenesis	2/103	16/18903	0.00335691	0.00775792	0.00307664	KDR/XDH	2
BP	GO:0007416	synapse assembly	5/103	184/18903	0.00335751	0.00775792	0.00307664	APP/NTRK1/SNCA/NTRK2/DRD2	5
BP	GO:1902107	positive regulation of leukocyte differentiation	5/103	184/18903	0.00335751	0.00775792	0.00307664	TNF/IL2/PTPRC/CASP8/PRKCA	5
BP	GO:1903708	positive regulation of hemopoiesis	5/103	184/18903	0.00335751	0.00775792	0.00307664	TNF/IL2/PTPRC/CASP8/PRKCA	5
BP	GO:0010718	positive regulation of epithelial to mesenchymal transition	3/103	56/18903	0.00353225	0.00814319	0.00322943	IL6/MTOR/EZH2	3
BP	GO:0043331	response to dsRNA	3/103	56/18903	0.00353225	0.00814319	0.00322943	MAPK3/MAPK1/NFKBIA	3
BP	GO:0071715	icosanoid transport	3/103	56/18903	0.00353225	0.00814319	0.00322943	PTGS2/ACE/DRD2	3
BP	GO:1903170	negative regulation of calcium ion transmembrane transport	3/103	56/18903	0.00353225	0.00814319	0.00322943	BCL2/DRD2/CALM1	3
BP	GO:0000910	cytokinesis	5/103	187/18903	0.00359726	0.00828835	0.003287	BCL2L1/CDC42/AURKA/DRD2/CALM1	5
BP	GO:0032410	negative regulation of transporter activity	4/103	115/18903	0.00361878	0.00832852	0.00330293	MMP9/SNCA/DRD2/CALM1	4
BP	GO:0032414	positive regulation of ion transmembrane transporter activity	4/103	115/18903	0.00361878	0.00832852	0.00330293	ABCB1/CTSS/ADRB2/CALM1	4
BP	GO:0030308	negative regulation of cell growth	5/103	188/18903	0.00367984	0.00846425	0.00335675	BCL2/SIRT1/PPARA/ESR2/G6PD	5
BP	GO:0006749	glutathione metabolic process	3/103	57/18903	0.00371387	0.00851366	0.00337635	NFE2L2/GSR/G6PD	3
BP	GO:0010658	striated muscle cell apoptotic process	3/103	57/18903	0.00371387	0.00851366	0.00337635	HSP90AA1/JAK2/NFE2L2	3
BP	GO:0032608	interferon-beta production	3/103	57/18903	0.00371387	0.00851366	0.00337635	HSP90AA1/TLR4/PTPN11	3
BP	GO:0032648	regulation of interferon-beta production	3/103	57/18903	0.00371387	0.00851366	0.00337635	HSP90AA1/TLR4/PTPN11	3
BP	GO:0050879	multicellular organismal movement	3/103	57/18903	0.00371387	0.00851366	0.00337635	TNF/HSP90AA1/MTOR	3
BP	GO:0050881	musculoskeletal movement	3/103	57/18903	0.00371387	0.00851366	0.00337635	TNF/HSP90AA1/MTOR	3
BP	GO:0006839	mitochondrial transport	5/103	189/18903	0.00376377	0.00859368	0.00340808	HSP90AA1/BCL2/GSK3B/BCL2L1/MAPK8	5
BP	GO:0001991	regulation of systemic arterial blood pressure by circulatory renin-angiotensin	2/103	17/18903	0.00379102	0.00859368	0.00340808	ACE/REN	2
BP	GO:0006089	lactate metabolic process	2/103	17/18903	0.00379102	0.00859368	0.00340808	HIF1A/LDHA	2
BP	GO:0010224	response to UV-B	2/103	17/18903	0.00379102	0.00859368	0.00340808	BCL2/RELA	2
BP	GO:0010763	positive regulation of fibroblast migration	2/103	17/18903	0.00379102	0.00859368	0.00340808	AKT1/ITGB1	2
BP	GO:0010831	positive regulation of myotube differentiation	2/103	17/18903	0.00379102	0.00859368	0.00340808	MTOR/MAPK14	2
BP	GO:0017014	protein nitrosylation	2/103	17/18903	0.00379102	0.00859368	0.00340808	GAPDH/ACE	2
BP	GO:0018119	peptidyl-cysteine S-nitrosylation	2/103	17/18903	0.00379102	0.00859368	0.00340808	GAPDH/ACE	2
BP	GO:0036005	response to macrophage colony-stimulating factor	2/103	17/18903	0.00379102	0.00859368	0.00340808	TNF/TLR4	2
BP	GO:0043923	positive regulation by host of viral transcription	2/103	17/18903	0.00379102	0.00859368	0.00340808	JUN/EP300	2
BP	GO:0051412	response to corticosterone	2/103	17/18903	0.00379102	0.00859368	0.00340808	CCND1/MAOB	2
BP	GO:0071732	cellular response to nitric oxide	2/103	17/18903	0.00379102	0.00859368	0.00340808	CDK2/CCNA2	2
BP	GO:0090494	dopamine uptake	2/103	17/18903	0.00379102	0.00859368	0.00340808	SNCA/DRD2	2
BP	GO:0098712	L-glutamate import across plasma membrane	2/103	17/18903	0.00379102	0.00859368	0.00340808	TNF/ITGB1	2
BP	GO:1900006	positive regulation of dendrite development	2/103	17/18903	0.00379102	0.00859368	0.00340808	EZH2/ABL1	2
BP	GO:1902036	regulation of hematopoietic stem cell differentiation	2/103	17/18903	0.00379102	0.00859368	0.00340808	ABL1/NFE2L2	2
BP	GO:1902165	regulation of intrinsic apoptotic signaling pathway in response to DNA damage by p53 class mediator	2/103	17/18903	0.00379102	0.00859368	0.00340808	BCL2/SIRT1	2
BP	GO:1903358	regulation of Golgi organization	2/103	17/18903	0.00379102	0.00859368	0.00340808	MAPK3/MAPK1	2
BP	GO:1904355	positive regulation of telomere capping	2/103	17/18903	0.00379102	0.00859368	0.00340808	MAPK3/MAPK1	2
BP	GO:2001267	regulation of cysteine-type endopeptidase activity involved in apoptotic signaling pathway	2/103	17/18903	0.00379102	0.00859368	0.00340808	MMP9/JAK2	2
BP	GO:0032956	regulation of actin cytoskeleton organization	7/103	365/18903	0.00383706	0.00869321	0.00344756	MTOR/GRB2/CDC42/BRAF/ABL1/PDGFRB/PTK2B	7
BP	GO:0021987	cerebral cortex development	4/103	117/18903	0.00384876	0.00871485	0.00345614	EGFR/HIF1A/GSK3B/NTRK2	4
BP	GO:0044380	protein localization to cytoskeleton	3/103	58/18903	0.0039011	0.00881865	0.0034973	GSK3B/ABL1/AURKA	3
BP	GO:0048016	inositol phosphate-mediated signaling	3/103	58/18903	0.0039011	0.00881865	0.0034973	TNF/MTOR/GSK3B	3
BP	GO:0048599	oocyte development	3/103	58/18903	0.0039011	0.00881865	0.0034973	BCL2/AURKA/PTK2B	3
BP	GO:0032535	regulation of cellular component size	7/103	367/18903	0.00395304	0.00893111	0.0035419	HSP90AA1/HSP90AB1/MTOR/GSK3B/GRB2/ABL1/PTK2B	7
BP	GO:0002718	regulation of cytokine production involved in immune response	4/103	118/18903	0.00396737	0.00894363	0.00354686	TNF/IL6/TLR4/SIRT1	4
BP	GO:0006805	xenobiotic metabolic process	4/103	118/18903	0.00396737	0.00894363	0.00354686	CYP3A4/ABCB1/CYP1A2/CYP2C9	4
BP	GO:0007088	regulation of mitotic nuclear division	4/103	118/18903	0.00396737	0.00894363	0.00354686	TNF/CDC42/PDGFRB/AURKA	4
BP	GO:0019751	polyol metabolic process	4/103	118/18903	0.00396737	0.00894363	0.00354686	FGF2/CYP3A4/SNCA/PTK2B	4
BP	GO:0002708	positive regulation of lymphocyte mediated immunity	4/103	119/18903	0.00408844	0.00919339	0.00364592	TNF/IL6/IL2/PTPRC	4
BP	GO:0002763	positive regulation of myeloid leukocyte differentiation	3/103	59/18903	0.00409398	0.00919339	0.00364592	TNF/CASP8/PRKCA	3
BP	GO:0006611	protein export from nucleus	3/103	59/18903	0.00409398	0.00919339	0.00364592	GSK3B/PRKACA/PTPN11	3
BP	GO:0010574	regulation of vascular endothelial growth factor production	3/103	59/18903	0.00409398	0.00919339	0.00364592	IL6/HIF1A/PTGS2	3
BP	GO:0051785	positive regulation of nuclear division	3/103	59/18903	0.00409398	0.00919339	0.00364592	TNF/PDGFRB/AURKA	3
BP	GO:0061098	positive regulation of protein tyrosine kinase activity	3/103	59/18903	0.00409398	0.00919339	0.00364592	SRC/EGFR/ACE	3
BP	GO:0097352	autophagosome maturation	3/103	59/18903	0.00409398	0.00919339	0.00364592	VCP/ADRB2/CALM1	3
BP	GO:0046578	regulation of Ras protein signal transduction	5/103	193/18903	0.00411329	0.00923165	0.00366109	SRC/ABL1/ITGB1/PDGFRB/NTRK1	5
BP	GO:0110053	regulation of actin filament organization	6/103	278/18903	0.00416986	0.00935344	0.00370939	MTOR/GRB2/CDC42/BRAF/ABL1/PTK2B	6
BP	GO:0009060	aerobic respiration	5/103	194/18903	0.00420418	0.00941853	0.0037352	TNF/HIF1A/CDK1/SNCA/VCP	5
BP	GO:0009749	response to glucose	5/103	194/18903	0.00420418	0.00941853	0.0037352	CASP3/HIF1A/PRKACA/ACE/PTK2B	5
BP	GO:0002367	cytokine production involved in immune response	4/103	120/18903	0.00421199	0.00941853	0.0037352	TNF/IL6/TLR4/SIRT1	4
BP	GO:0090288	negative regulation of cellular response to growth factor stimulus	4/103	120/18903	0.00421199	0.00941853	0.0037352	PPARG/FGF2/ABL1/XDH	4
BP	GO:0006474	N-terminal protein amino acid acetylation	2/103	18/18903	0.0042498	0.00941853	0.0037352	EP300/CREBBP	2
BP	GO:0010958	regulation of amino acid import across plasma membrane	2/103	18/18903	0.0042498	0.00941853	0.0037352	TNF/ITGB1	2
BP	GO:0030540	female genitalia development	2/103	18/18903	0.0042498	0.00941853	0.0037352	ESR1/CYP19A1	2
BP	GO:0035067	negative regulation of histone acetylation	2/103	18/18903	0.0042498	0.00941853	0.0037352	SIRT1/SNCA	2
BP	GO:0036499	PERK-mediated unfolded protein response	2/103	18/18903	0.0042498	0.00941853	0.0037352	HSPA5/NFE2L2	2
BP	GO:0045722	positive regulation of gluconeogenesis	2/103	18/18903	0.0042498	0.00941853	0.0037352	SIRT1/PPARA	2
BP	GO:0045780	positive regulation of bone resorption	2/103	18/18903	0.0042498	0.00941853	0.0037352	SRC/PRKCA	2
BP	GO:0045945	positive regulation of transcription by RNA polymerase III	2/103	18/18903	0.0042498	0.00941853	0.0037352	MTOR/AR	2
BP	GO:0046827	positive regulation of protein export from nucleus	2/103	18/18903	0.0042498	0.00941853	0.0037352	GSK3B/PRKACA	2
BP	GO:0048569	post-embryonic animal organ development	2/103	18/18903	0.0042498	0.00941853	0.0037352	JAK2/KDR	2
BP	GO:0050802	circadian sleep/wake cycle, sleep	2/103	18/18903	0.0042498	0.00941853	0.0037352	PARP1/DRD2	2
BP	GO:0072567	chemokine (C-X-C motif) ligand 2 production	2/103	18/18903	0.0042498	0.00941853	0.0037352	TNF/TLR4	2
BP	GO:0086103	G protein-coupled receptor signaling pathway involved in heart process	2/103	18/18903	0.0042498	0.00941853	0.0037352	SRC/CDC42	2
BP	GO:0090493	catecholamine uptake	2/103	18/18903	0.0042498	0.00941853	0.0037352	SNCA/DRD2	2
BP	GO:0097067	cellular response to thyroid hormone stimulus	2/103	18/18903	0.0042498	0.00941853	0.0037352	CTSB/CTSS	2
BP	GO:0150078	positive regulation of neuroinflammatory response	2/103	18/18903	0.0042498	0.00941853	0.0037352	TNF/IL6	2
BP	GO:1903789	regulation of amino acid transmembrane transport	2/103	18/18903	0.0042498	0.00941853	0.0037352	TNF/ITGB1	2
BP	GO:2000341	regulation of chemokine (C-X-C motif) ligand 2 production	2/103	18/18903	0.0042498	0.00941853	0.0037352	TNF/TLR4	2
BP	GO:0002753	cytoplasmic pattern recognition receptor signaling pathway	3/103	60/18903	0.00429258	0.00949782	0.00376665	TLR4/RELA/NFKBIA	3
BP	GO:0045599	negative regulation of fat cell differentiation	3/103	60/18903	0.00429258	0.00949782	0.00376665	TNF/IL6/SIRT1	3
BP	GO:2000300	regulation of synaptic vesicle exocytosis	3/103	60/18903	0.00429258	0.00949782	0.00376665	GSK3B/BRAF/DRD2	3
BP	GO:0006720	isoprenoid metabolic process	4/103	121/18903	0.00433804	0.00957758	0.00379828	CYP3A4/HMGCR/CYP1A2/CYP2C9	4
BP	GO:0030301	cholesterol transport	4/103	121/18903	0.00433804	0.00957758	0.00379828	PPARG/SIRT1/NFKBIA/RXRA	4
BP	GO:0031623	receptor internalization	4/103	121/18903	0.00433804	0.00957758	0.00379828	GRB2/ITGB1/SNCA/DRD2	4
BP	GO:0045446	endothelial cell differentiation	4/103	121/18903	0.00433804	0.00957758	0.00379828	TNF/KDR/FASN/XDH	4
BP	GO:0045664	regulation of neuron differentiation	5/103	196/18903	0.00439025	0.00968759	0.0038419	BCL2/GSK3B/APP/FGF2/ITGB1	5
BP	GO:0002698	negative regulation of immune effector process	4/103	122/18903	0.00446661	0.00984542	0.0039045	TNF/IL2/PTPRC/LGALS3	4
BP	GO:0006476	protein deacetylation	4/103	122/18903	0.00446661	0.00984542	0.0039045	SIRT1/EP300/HDAC1/MAPK8	4
BP	GO:0034113	heterotypic cell-cell adhesion	3/103	61/18903	0.00449693	0.00989616	0.00392462	TNF/PTPRC/ITGB1	3
BP	GO:0090311	regulation of protein deacetylation	3/103	61/18903	0.00449693	0.00989616	0.00392462	SIRT1/EP300/MAPK8	3
BP	GO:1900024	regulation of substrate adhesion-dependent cell spreading	3/103	61/18903	0.00449693	0.00989616	0.00392462	CDC42/BRAF/ABL1	3
BP	GO:0043547	positive regulation of GTPase activity	6/103	283/18903	0.0045454	0.00999743	0.00396478	ERBB2/GSK3B/EZH2/ITGB1/NTRK1/PTK2B	6
BP	GO:0002695	negative regulation of leukocyte activation	5/103	198/18903	0.00458212	0.0100727	0.00399465	CASP3/ERBB2/IL2/PTPRC/LGALS3	5
BP	GO:0002697	regulation of immune effector process	7/103	379/18903	0.00470591	0.0102931	0.00408205	TNF/IL6/TLR4/SIRT1/IL2/PTPRC/LGALS3	7
BP	GO:0009994	oocyte differentiation	3/103	62/18903	0.00470708	0.0102931	0.00408205	BCL2/AURKA/PTK2B	3
BP	GO:0022617	extracellular matrix disassembly	3/103	62/18903	0.00470708	0.0102931	0.00408205	IL6/MMP9/CTSS	3
BP	GO:0072676	lymphocyte migration	4/103	124/18903	0.00473141	0.0102931	0.00408205	AKT1/APP/ABL1/PTK2B	4
BP	GO:0002544	chronic inflammatory response	2/103	19/18903	0.00473296	0.0102931	0.00408205	TNF/CYP19A1	2
BP	GO:0002923	regulation of humoral immune response mediated by circulating immunoglobulin	2/103	19/18903	0.00473296	0.0102931	0.00408205	TNF/PTPRC	2
BP	GO:0006098	pentose-phosphate shunt	2/103	19/18903	0.00473296	0.0102931	0.00408205	MTOR/G6PD	2
BP	GO:0006837	serotonin transport	2/103	19/18903	0.00473296	0.0102931	0.00408205	SNCA/MAOB	2
BP	GO:0010759	positive regulation of macrophage chemotaxis	2/103	19/18903	0.00473296	0.0102931	0.00408205	MAPK3/MAPK1	2
BP	GO:0010885	regulation of cholesterol storage	2/103	19/18903	0.00473296	0.0102931	0.00408205	PPARG/PPARA	2
BP	GO:0019373	epoxygenase P450 pathway	2/103	19/18903	0.00473296	0.0102931	0.00408205	CYP1A2/CYP2C9	2
BP	GO:0032026	response to magnesium ion	2/103	19/18903	0.00473296	0.0102931	0.00408205	CCND1/SNCA	2
BP	GO:0060438	trachea development	2/103	19/18903	0.00473296	0.0102931	0.00408205	MAPK3/MAPK1	2
BP	GO:0061298	retina vasculature development in camera-type eye	2/103	19/18903	0.00473296	0.0102931	0.00408205	HIF1A/PDGFRB	2
BP	GO:0071800	podosome assembly	2/103	19/18903	0.00473296	0.0102931	0.00408205	TNF/SRC	2
BP	GO:0097202	activation of cysteine-type endopeptidase activity	2/103	19/18903	0.00473296	0.0102931	0.00408205	CASP8/CASP9	2
BP	GO:0097284	hepatocyte apoptotic process	2/103	19/18903	0.00473296	0.0102931	0.00408205	BCL2L1/PPARA	2
BP	GO:0099563	modification of synaptic structure	2/103	19/18903	0.00473296	0.0102931	0.00408205	CDC42/ABL1	2
BP	GO:1902170	cellular response to reactive nitrogen species	2/103	19/18903	0.00473296	0.0102931	0.00408205	CDK2/CCNA2	2
BP	GO:2000251	positive regulation of actin cytoskeleton reorganization	2/103	19/18903	0.00473296	0.0102931	0.00408205	CDC42/ABL1	2
BP	GO:0008154	actin polymerization or depolymerization	5/103	200/18903	0.0047799	0.0103896	0.00412033	MTOR/JAK2/GRB2/ABL1/PTK2B	5
BP	GO:0051216	cartilage development	5/103	201/18903	0.00488104	0.0105982	0.00420302	HIF1A/MAPK3/MAPK14/FGF2/PTPN11	5
BP	GO:0060491	regulation of cell projection assembly	5/103	201/18903	0.00488104	0.0105982	0.00420302	SRC/HSP90AA1/MTOR/GSK3B/CDC42	5
BP	GO:0032615	interleukin-12 production	3/103	63/18903	0.00492309	0.0106554	0.0042257	TLR4/RELA/MAPK14	3
BP	GO:0032655	regulation of interleukin-12 production	3/103	63/18903	0.00492309	0.0106554	0.0042257	TLR4/RELA/MAPK14	3
BP	GO:0046579	positive regulation of Ras protein signal transduction	3/103	63/18903	0.00492309	0.0106554	0.0042257	SRC/PDGFRB/NTRK1	3
BP	GO:0070059	intrinsic apoptotic signaling pathway in response to endoplasmic reticulum stress	3/103	63/18903	0.00492309	0.0106554	0.0042257	BCL2/SIRT1/BCL2L1	3
BP	GO:0070542	response to fatty acid	3/103	63/18903	0.00492309	0.0106554	0.0042257	SRC/PTGS2/CDK4	3
BP	GO:2001258	negative regulation of cation channel activity	3/103	63/18903	0.00492309	0.0106554	0.0042257	MMP9/DRD2/CALM1	3
BP	GO:0006417	regulation of translation	8/103	486/18903	0.00508796	0.0110063	0.00436489	GAPDH/AKT1/TNF/IL6/ERBB2/MTOR/APP/PTK2B	8
BP	GO:0002712	regulation of B cell mediated immunity	3/103	64/18903	0.005145	0.0110952	0.00440013	TNF/IL2/PTPRC	3
BP	GO:0002889	regulation of immunoglobulin mediated immune response	3/103	64/18903	0.005145	0.0110952	0.00440013	TNF/IL2/PTPRC	3
BP	GO:0050918	positive chemotaxis	3/103	64/18903	0.005145	0.0110952	0.00440013	KDR/FGF2/LGALS3	3
BP	GO:0051893	regulation of focal adhesion assembly	3/103	64/18903	0.005145	0.0110952	0.00440013	SRC/KDR/ABL1	3
BP	GO:0090109	regulation of cell-substrate junction assembly	3/103	64/18903	0.005145	0.0110952	0.00440013	SRC/KDR/ABL1	3
BP	GO:0001704	formation of primary germ layer	4/103	127/18903	0.00514812	0.0110952	0.00440013	MMP9/GRB2/PRKACA/ITGB1	4
BP	GO:0001838	embryonic epithelial tube formation	4/103	127/18903	0.00514812	0.0110952	0.00440013	CASP3/HIF1A/PRKACA/ABL1	4
BP	GO:0007171	activation of transmembrane receptor protein tyrosine kinase activity	2/103	20/18903	0.00524024	0.0112165	0.00444824	EGFR/ADRB2	2
BP	GO:0009110	vitamin biosynthetic process	2/103	20/18903	0.00524024	0.0112165	0.00444824	TNF/CYP3A4	2
BP	GO:0010288	response to lead ion	2/103	20/18903	0.00524024	0.0112165	0.00444824	PTGS2/APP	2
BP	GO:0010310	regulation of hydrogen peroxide metabolic process	2/103	20/18903	0.00524024	0.0112165	0.00444824	FYN/SNCA	2
BP	GO:0031998	regulation of fatty acid beta-oxidation	2/103	20/18903	0.00524024	0.0112165	0.00444824	AKT1/PPARA	2
BP	GO:0042359	vitamin D metabolic process	2/103	20/18903	0.00524024	0.0112165	0.00444824	TNF/CYP3A4	2
BP	GO:0042749	regulation of circadian sleep/wake cycle	2/103	20/18903	0.00524024	0.0112165	0.00444824	PARP1/DRD2	2
BP	GO:0051546	keratinocyte migration	2/103	20/18903	0.00524024	0.0112165	0.00444824	MMP9/MTOR	2
BP	GO:0060716	labyrinthine layer blood vessel development	2/103	20/18903	0.00524024	0.0112165	0.00444824	AKT1/MAPK1	2
BP	GO:0097709	connective tissue replacement	2/103	20/18903	0.00524024	0.0112165	0.00444824	HIF1A/PPARG	2
BP	GO:1903427	negative regulation of reactive oxygen species biosynthetic process	2/103	20/18903	0.00524024	0.0112165	0.00444824	PPARA/FYN	2
BP	GO:1903978	regulation of microglial cell activation	2/103	20/18903	0.00524024	0.0112165	0.00444824	IL6/PTPRC	2
BP	GO:2000479	regulation of cAMP-dependent protein kinase activity	2/103	20/18903	0.00524024	0.0112165	0.00444824	SIRT1/ADRB2	2
BP	GO:0050868	negative regulation of T cell activation	4/103	128/18903	0.00529231	0.011322	0.00449007	CASP3/ERBB2/IL2/LGALS3	4
BP	GO:0032613	interleukin-10 production	3/103	65/18903	0.00537285	0.0114762	0.00455123	IL6/STAT3/TLR4	3
BP	GO:0032653	regulation of interleukin-10 production	3/103	65/18903	0.00537285	0.0114762	0.00455123	IL6/STAT3/TLR4	3
BP	GO:0060760	positive regulation of response to cytokine stimulus	3/103	65/18903	0.00537285	0.0114762	0.00455123	HIF1A/TLR4/CASP1	3
BP	GO:2000241	regulation of reproductive process	5/103	206/18903	0.00540964	0.0115487	0.00457999	SRC/ESR1/BCL2L1/AR/AURKA	5
BP	GO:0014902	myotube differentiation	4/103	129/18903	0.00543918	0.0115875	0.00459535	BCL2/MTOR/MAPK14/ITGB1	4
BP	GO:0048593	camera-type eye morphogenesis	4/103	129/18903	0.00543918	0.0115875	0.00459535	STAT3/HIF1A/KDR/NTRK2	4
BP	GO:0050714	positive regulation of protein secretion	4/103	129/18903	0.00543918	0.0115875	0.00459535	HIF1A/PPARG/TLR4/JAK2	4
BP	GO:0051224	negative regulation of protein transport	4/103	129/18903	0.00543918	0.0115875	0.00459535	PTPN11/HMGCR/DRD2/OPRM1	4
BP	GO:0019079	viral genome replication	4/103	130/18903	0.00558876	0.0118874	0.00471432	TNF/BCL2/PPARA/VCP	4
BP	GO:0031929	TOR signaling	4/103	130/18903	0.00558876	0.0118874	0.00471432	AKT1/HIF1A/MTOR/SIRT1	4
BP	GO:0050853	B cell receptor signaling pathway	4/103	130/18903	0.00558876	0.0118874	0.00471432	BCL2/MAPK1/PTPRC/ABL1	4
BP	GO:0042490	mechanoreceptor differentiation	3/103	66/18903	0.00560669	0.0119069	0.00472204	FGF2/NTRK1/NTRK2	3
BP	GO:0050854	regulation of antigen receptor-mediated signaling pathway	3/103	66/18903	0.00560669	0.0119069	0.00472204	RELA/PTPRC/LGALS3	3
BP	GO:0071300	cellular response to retinoic acid	3/103	66/18903	0.00560669	0.0119069	0.00472204	TNF/GSK3B/PTK2B	3
BP	GO:0002029	desensitization of G protein-coupled receptor signaling pathway	2/103	21/18903	0.00577137	0.0121363	0.00481301	DRD2/ADRB2	2
BP	GO:0003085	negative regulation of systemic arterial blood pressure	2/103	21/18903	0.00577137	0.0121363	0.00481301	TNF/ADRB2	2
BP	GO:0010829	negative regulation of glucose transmembrane transport	2/103	21/18903	0.00577137	0.0121363	0.00481301	TNF/ACE	2
BP	GO:0010878	cholesterol storage	2/103	21/18903	0.00577137	0.0121363	0.00481301	PPARG/PPARA	2
BP	GO:0022401	negative adaptation of signaling pathway	2/103	21/18903	0.00577137	0.0121363	0.00481301	DRD2/ADRB2	2
BP	GO:0022410	circadian sleep/wake cycle process	2/103	21/18903	0.00577137	0.0121363	0.00481301	PARP1/DRD2	2
BP	GO:0030502	negative regulation of bone mineralization	2/103	21/18903	0.00577137	0.0121363	0.00481301	HIF1A/PTK2B	2
BP	GO:0032098	regulation of appetite	2/103	21/18903	0.00577137	0.0121363	0.00481301	PPARA/OPRM1	2
BP	GO:0035902	response to immobilization stress	2/103	21/18903	0.00577137	0.0121363	0.00481301	REN/PTK2B	2
BP	GO:0050849	negative regulation of calcium-mediated signaling	2/103	21/18903	0.00577137	0.0121363	0.00481301	MTOR/GSK3B	2
BP	GO:0060252	positive regulation of glial cell proliferation	2/103	21/18903	0.00577137	0.0121363	0.00481301	TNF/IL6	2
BP	GO:0060973	cell migration involved in heart development	2/103	21/18903	0.00577137	0.0121363	0.00481301	CDC42/PDGFRB	2
BP	GO:0061050	regulation of cell growth involved in cardiac muscle cell development	2/103	21/18903	0.00577137	0.0121363	0.00481301	PPARA/G6PD	2
BP	GO:0071731	response to nitric oxide	2/103	21/18903	0.00577137	0.0121363	0.00481301	CDK2/CCNA2	2
BP	GO:0090141	positive regulation of mitochondrial fission	2/103	21/18903	0.00577137	0.0121363	0.00481301	KDR/AURKA	2
BP	GO:0090201	negative regulation of release of cytochrome c from mitochondria	2/103	21/18903	0.00577137	0.0121363	0.00481301	AKT1/BCL2L1	2
BP	GO:0097062	dendritic spine maintenance	2/103	21/18903	0.00577137	0.0121363	0.00481301	FYN/GRIN2B	2
BP	GO:1903429	regulation of cell maturation	2/103	21/18903	0.00577137	0.0121363	0.00481301	BCL2/AURKA	2
BP	GO:2000757	negative regulation of peptidyl-lysine acetylation	2/103	21/18903	0.00577137	0.0121363	0.00481301	SIRT1/SNCA	2
BP	GO:0009620	response to fungus	3/103	67/18903	0.00584655	0.0122817	0.00487067	GAPDH/TLR4/MPO	3
BP	GO:0051205	protein insertion into membrane	3/103	67/18903	0.00584655	0.0122817	0.00487067	EGFR/HSP90AA1/MAPK8	3
BP	GO:0045619	regulation of lymphocyte differentiation	5/103	210/18903	0.00586078	0.0123052	0.00488	ERBB2/IL2/PTPRC/BRAF/ABL1	5
BP	GO:0035601	protein deacylation	4/103	133/18903	0.00605393	0.0126977	0.00503564	SIRT1/EP300/HDAC1/MAPK8	4
BP	GO:1904950	negative regulation of establishment of protein localization	4/103	133/18903	0.00605393	0.0126977	0.00503564	PTPN11/HMGCR/DRD2/OPRM1	4
BP	GO:0006949	syncytium formation	3/103	68/18903	0.00609248	0.0127588	0.00505988	MAPK14/ITGB1/CYP19A1	3
BP	GO:0042446	hormone biosynthetic process	3/103	68/18903	0.00609248	0.0127588	0.00505988	HIF1A/NR3C1/CYP19A1	3
BP	GO:0045670	regulation of osteoclast differentiation	3/103	68/18903	0.00609248	0.0127588	0.00505988	TNF/MTOR/TLR4	3
BP	GO:0006836	neurotransmitter transport	5/103	212/18903	0.00609602	0.0127596	0.00506021	GSK3B/BRAF/ITGB1/SNCA/DRD2	5
BP	GO:0002070	epithelial cell maturation	2/103	22/18903	0.00632607	0.0131397	0.00521096	HIF1A/KDR	2
BP	GO:0002902	regulation of B cell apoptotic process	2/103	22/18903	0.00632607	0.0131397	0.00521096	BCL2/IL2	2
BP	GO:0006740	NADPH regeneration	2/103	22/18903	0.00632607	0.0131397	0.00521096	MTOR/G6PD	2
BP	GO:0010881	regulation of cardiac muscle contraction by regulation of the release of sequestered calcium ion	2/103	22/18903	0.00632607	0.0131397	0.00521096	PRKACA/CALM1	2
BP	GO:0030728	ovulation	2/103	22/18903	0.00632607	0.0131397	0.00521096	PTGS2/SIRT1	2
BP	GO:0032069	regulation of nuclease activity	2/103	22/18903	0.00632607	0.0131397	0.00521096	AKT1/SIRT1	2
BP	GO:0032891	negative regulation of organic acid transport	2/103	22/18903	0.00632607	0.0131397	0.00521096	AKT1/TNF	2
BP	GO:0034104	negative regulation of tissue remodeling	2/103	22/18903	0.00632607	0.0131397	0.00521096	IL6/PPARG	2
BP	GO:0035313	wound healing, spreading of epidermal cells	2/103	22/18903	0.00632607	0.0131397	0.00521096	MTOR/ITGB1	2
BP	GO:0035855	megakaryocyte development	2/103	22/18903	0.00632607	0.0131397	0.00521096	EP300/PTPN11	2
BP	GO:0061042	vascular wound healing	2/103	22/18903	0.00632607	0.0131397	0.00521096	TNF/KDR	2
BP	GO:0071404	cellular response to low-density lipoprotein particle stimulus	2/103	22/18903	0.00632607	0.0131397	0.00521096	PPARG/ITGB1	2
BP	GO:0072574	hepatocyte proliferation	2/103	22/18903	0.00632607	0.0131397	0.00521096	TNF/IL6	2
BP	GO:0072575	epithelial cell proliferation involved in liver morphogenesis	2/103	22/18903	0.00632607	0.0131397	0.00521096	TNF/IL6	2
BP	GO:2000810	regulation of bicellular tight junction assembly	2/103	22/18903	0.00632607	0.0131397	0.00521096	TNF/PRKACA	2
BP	GO:0034394	protein localization to cell surface	3/103	69/18903	0.00634452	0.0131579	0.00521817	AKT1/TNF/HSP90AB1	3
BP	GO:0051148	negative regulation of muscle cell differentiation	3/103	69/18903	0.00634452	0.0131579	0.00521817	EZH2/PPARA/G6PD	3
BP	GO:0150116	regulation of cell-substrate junction organization	3/103	69/18903	0.00634452	0.0131579	0.00521817	SRC/KDR/ABL1	3
BP	GO:0007098	centrosome cycle	4/103	135/18903	0.00637797	0.0132138	0.00524034	SIRT1/CDK2/CDK1/AURKA	4
BP	GO:0015918	sterol transport	4/103	135/18903	0.00637797	0.0132138	0.00524034	PPARG/SIRT1/NFKBIA/RXRA	4
BP	GO:0006275	regulation of DNA replication	4/103	136/18903	0.00654422	0.0135514	0.0053742	EGFR/CDK2/CDK1/CCNA2	4
BP	GO:0098732	macromolecule deacylation	4/103	137/18903	0.00671333	0.0138945	0.00551027	SIRT1/EP300/HDAC1/MAPK8	4
BP	GO:0032970	regulation of actin filament-based process	7/103	406/18903	0.00679218	0.0140505	0.00557216	MTOR/GRB2/CDC42/BRAF/ABL1/PDGFRB/PTK2B	7
BP	GO:0051057	positive regulation of small GTPase mediated signal transduction	3/103	71/18903	0.00686707	0.014191	0.00562787	SRC/PDGFRB/NTRK1	3
BP	GO:0070527	platelet aggregation	3/103	71/18903	0.00686707	0.014191	0.00562787	IL6/JAK2/PRKCA	3
BP	GO:0019430	removal of superoxide radicals	2/103	23/18903	0.00690407	0.0142313	0.00564386	NFE2L2/MPO	2
BP	GO:0023058	adaptation of signaling pathway	2/103	23/18903	0.00690407	0.0142313	0.00564386	DRD2/ADRB2	2
BP	GO:0051131	chaperone-mediated protein complex assembly	2/103	23/18903	0.00690407	0.0142313	0.00564386	HSP90AA1/HSP90AB1	2
BP	GO:0072576	liver morphogenesis	2/103	23/18903	0.00690407	0.0142313	0.00564386	TNF/IL6	2
BP	GO:1900273	positive regulation of long-term synaptic potentiation	2/103	23/18903	0.00690407	0.0142313	0.00564386	APP/DRD2	2
BP	GO:0003158	endothelium development	4/103	139/18903	0.00706019	0.0145384	0.00576564	TNF/KDR/FASN/XDH	4
BP	GO:1903008	organelle disassembly	4/103	139/18903	0.00706019	0.0145384	0.00576564	HIF1A/CDK1/AURKA/VCP	4
BP	GO:0045911	positive regulation of DNA recombination	3/103	72/18903	0.00713765	0.0146831	0.00582301	IL2/PARP1/PTPRC	3
BP	GO:0070265	necrotic cell death	3/103	72/18903	0.00713765	0.0146831	0.00582301	TNF/PARP1/CASP8	3
BP	GO:0002705	positive regulation of leukocyte mediated immunity	4/103	140/18903	0.00723797	0.0148669	0.00589591	TNF/IL6/IL2/PTPRC	4
BP	GO:0048813	dendrite morphogenesis	4/103	140/18903	0.00723797	0.0148669	0.00589591	GSK3B/CDC42/ITGB1/FYN	4
BP	GO:0060048	cardiac muscle contraction	4/103	140/18903	0.00723797	0.0148669	0.00589591	HSP90AA1/MTOR/PRKACA/CALM1	4
BP	GO:0045665	negative regulation of neuron differentiation	3/103	73/18903	0.00741449	0.0152218	0.00603665	GSK3B/APP/ITGB1	3
BP	GO:0007093	mitotic cell cycle checkpoint signaling	4/103	141/18903	0.0074187	0.0152227	0.00603703	CCND1/MDM2/CDK2/CDK1	4
BP	GO:0001759	organ induction	2/103	24/18903	0.00750511	0.0153151	0.00607366	FGF2/AR	2
BP	GO:0002922	positive regulation of humoral immune response	2/103	24/18903	0.00750511	0.0153151	0.00607366	TNF/PTPRC	2
BP	GO:0006346	DNA methylation-dependent heterochromatin formation	2/103	24/18903	0.00750511	0.0153151	0.00607366	SIRT1/HDAC1	2
BP	GO:0006925	inflammatory cell apoptotic process	2/103	24/18903	0.00750511	0.0153151	0.00607366	IL6/SIRT1	2
BP	GO:0010640	regulation of platelet-derived growth factor receptor signaling pathway	2/103	24/18903	0.00750511	0.0153151	0.00607366	SRC/SNCA	2
BP	GO:0035162	embryonic hemopoiesis	2/103	24/18903	0.00750511	0.0153151	0.00607366	HIF1A/KDR	2
BP	GO:0042745	circadian sleep/wake cycle	2/103	24/18903	0.00750511	0.0153151	0.00607366	PARP1/DRD2	2
BP	GO:0060907	positive regulation of macrophage cytokine production	2/103	24/18903	0.00750511	0.0153151	0.00607366	TLR4/SIRT1	2
BP	GO:0070233	negative regulation of T cell apoptotic process	2/103	24/18903	0.00750511	0.0153151	0.00607366	BCL2/HIF1A	2
BP	GO:1901386	negative regulation of voltage-gated calcium channel activity	2/103	24/18903	0.00750511	0.0153151	0.00607366	DRD2/CALM1	2
BP	GO:2001026	regulation of endothelial cell chemotaxis	2/103	24/18903	0.00750511	0.0153151	0.00607366	KDR/FGF2	2
BP	GO:0018205	peptidyl-lysine modification	7/103	414/18903	0.00752551	0.015349	0.00608712	SIRT1/EP300/MDM2/RELA/EZH2/CREBBP/SNCA	7
BP	GO:0070988	demethylation	3/103	74/18903	0.00769761	0.0156922	0.0062232	CYP3A4/CYP1A2/CYP2C9	3
BP	GO:0050810	regulation of steroid biosynthetic process	3/103	75/18903	0.00798705	0.0162741	0.00645397	TNF/SIRT1/NR3C1	3
BP	GO:0003071	renal system process involved in regulation of systemic arterial blood pressure	2/103	25/18903	0.00812893	0.0164152	0.00650994	REN/AGTR1	2
[truncated: 823 more rows]
