# Supplementary material for: Integrated approach with UHPLC-Q-Exactive-tandem mass spectrometry, network analysis, and molecular docking to determine potential active compounds and mechanisms of Rhizoma Musae decoction in osteoarthritis treatment
Source: Front Pharmacol. 2025 Jan 2;15:1380335. doi: 10.3389/fphar.2024.1380335 (PMC11735259; doi:10.3389/fphar.2024.1380335)
Supplement: Supplementary file 4 [file Table1.XLSX]

## Sheet: Sheet1
Table S1. Active compounds in Rhizoma Musae decoction
No.	Coumpond	Formula	Rt(min)	m/z	Ion mode	Pubchem ID
1	Betaine	C5H11NO2	0.936267	118.086	POS	247
2	3-O-Caffeoylquinic acid	C16H18O9	5.75038	353.087	NEG	1794427
3	Cholinesulfuric acid.	C5H13NO4S	0.925333	184.064	POS	485
4	Eleutherazine B	C22H36N4O6	7.22037	453.27	POS	20839739
5	ADENOSINE	C10H13N5O4	4.05693	268.104	POS	60961
6	7beta-Hydroxyrutaecarpine	C18H12N3O2	12.8674	303.101	POS	15225951
7	Ginsenoside Rg1	C42H72O14	10.5424	823.48	POS	441923
8	4-Hydroxybenzoic acid	C7H6O3	6.69642	137.023	NEG	135
9	Trigonelline	C7H7NO2	1.0095	138.055	POS	5570
10	Vanillic acid	C8H8O4	7.239	167.034	NEG	8468
11	D-mannitol	C6H14O6	0.929017	181.071	NEG	6251
12	Carnitine	C7H15NO3	0.936267	162.112	POS	288
13	2,16-Kauranediol 2-O-beta-D-allopyranoside	C26H44O7	12.4255	491.297	POS	73554066
14	Scopoletin	C10H8O4	8.08703	237.04	NEG	5280460
15	4-Hydroxyphenylpyruvic acid	C9H8O4	5.85345	163.039	POS	979
16	caffeic acid	C9H8O4	6.79603	163.039	POS	689043
17	Suavioside A	C26H44O8	11.5394	507.292	POS	73821014
18	D-LEUCINE	C6H13NO2	2.01498	132.102	POS	439524
19	Vanillin	C8H8O3	7.75717	151.039	NEG	1183
20	D-Glutamic acid	C5H9NO4	0.925333	148.06	POS	23327
21	myo-Inositol	C6H12O6	1.0603	179.055	NEG	892
22	Guanosine	C10H13N5O5	2.0546	284.098	POS	135398635
23	D-proline	C5H9NO2	1.02727	116.071	POS	8988
24	Sugeroside	C26H42O8	11.7366	505.276	POS	3082543
25	Opuntiol	C7H8O4	1.0624	174.076	POS	10034839
26	Xylitol	C5H12O5	0.940367	151.06	NEG	6912
27	URIDINE	C9H12N2O6	2.78652	243.062	NEG	6029
28	D-Valine	C5H11NO2	0.936267	235.165	POS	71563
29	Gallic acid	C7H6O5	3.10902	169.013	NEG	370
30	7,8-Dihydroxycoumarin	C9H6O4	7.13302	223.024	NEG	5280569
31	Quinic acid	C7H12O6	3.84463	173.045	NEG	6508
32	Lucidone	C15H12O4	9.50683	301.071	NEG	11253859
33	5,7-Dihydroxyphthalide	C8H6O4	6.14723	211.024	NEG	11062751
34	3,4-Dihydroxyphenylacetic acid	C8H8O4	5.09005	167.034	NEG	547
35	D-Arabinose	C5H10O5	0.951267	133.05	POS	854
36	alpha-Isowighteone	C20H18O5	12.0827	303.101	POS	91885205
37	Aconine	C25H41NO9	12.4353	517.313	POS	20054813
38	Syringolin A	C24H39N5O6	12.1848	535.324	POS	42601513
39	N-Isobutyl-2,4,12-octadecatrienamide	C22H39NO	12.9108	378.275	POS	25221579
40	Stemonidine	C19H29NO5	13.2851	332.186	NEG	24721470
41	[(3,8,12-trihydroxy-24-oxocholan-24-yl)amino]acetate	C26H42NO6-	10.5424	509.272	POS	11834768
42	Giffonin R	C19H16O3	10.7396	257.096	POS	134715258
43	4-AMINOBUTYRIC ACID	C4H9NO2	0.936267	104.071	POS	119
44	linoleic acid	C18H32O2	14.8891	313.273	POS	5280450
45	Paeonilactone A	C10H14O4	6.74798	216.123	POS	10081437
46	3-Hexen-1-ol O-b-D-glucopyranoside	C12H22O6	9.2534	261.134	NEG	5318045
47	D-Glucosamine	C6H13NO5	0.96365	180.086	POS	439213
48	Pierisformoside B	C26H42O8	11.0907	505.276	POS	155978780
49	3'-Hydroxyxanthyletin	C14H12O4	10.2977	227.07	POS	129069558
50	Adenine	C5H5N5	1.29593	136.062	POS	190
51	Preisocalamendiol	C15H24O	10.5424	203.179	POS	12305706
52	Gamabufotalin	C24H34O5	12.2416	403.245	POS	259803
53	Longicaulenone	C12H18O4	7.91153	249.111	POS	25750965
54	7-Deoxyechinosporin	C10H9NO4	6.96413	190.05	POS	11745823
55	Notoginsenoside R1	C47H80O18	10.2166	955.522	POS	131752529
56	4-Epialyxialactone	C10H16O4	10.082	199.097	NEG	14194344
57	Pinocembrin diacetate	C19H16O6	9.42255	385.092	NEG	6546286
58	Dehydroacerogenin C	C19H18O3	11.5181	259.111	POS	154790969
59	Excavatin M	C19H20O7	7.8124	359.113	NEG	15871351
60	L(+)-Ascorbic acid	C6H8O6	1.22842	221.03	NEG	54670067
61	7,8-Benzoflavone	C19H12O2	10.7804	317.081	NEG	11790
62	1,6-anhydro-b-D-Glucose	C6H10O5	1.22842	207.05	NEG	2724705
63	Uracil	C4H4N2O2	2.87465	113.035	POS	1174
64	Amentoflavone	C30H18O10	0.977967	539.1	POS	5281600
65	Methyl gallate	C8H8O5	6.19388	165.018	NEG	7428
66	trans-5-Hydroxyferulic acid	C10H10O5	7.78592	209.045	NEG	446834
67	Danshenol C	C21H20O4	11.5181	301.122	POS	11688609
68	Citropten	C11H10O4	8.24893	251.056	NEG	2775
69	ferulic acid	C10H10O4	9.591	193.05	NEG	445858
70	Lonfuranacid A	C12H20O5	9.90452	243.123	NEG	146116229
71	Sarracenin	C11H14O5	7.47562	227.091	POS	427877
72	Hexylitaconic acid	C11H18O4	11.6655	213.113	NEG	11447214
73	Cyclocerberidol	C9H16O4	7.17102	153.091	POS	14466834
74	Microminutin	C15H12O5	8.91185	317.066	NEG	5319827
75	D-Glucosaminic acid	C6H13NO6	0.977967	160.06	POS	73563
76	4,5-Dihydroblumenol A	C13H22O3	10.2391	191.143	POS	21630916
77	Magnaldehyde B	C18H16O3	12.2873	245.096	POS	5320888
78	2,6,6-Trimethyl-2,4-cycloheptadien-1-one	C10H14O	9.30055	183.138	POS	136330
79	Methyl 4-hydroxy-3-methoxycinnamate	C11H12O4	8.66857	209.081	POS	5357283
80	Alternariol	C14H10O5	8.69498	241.049	POS	5359485
81	4-Hydroxycinnamamide	C9H9NO2	6.1847	198.032	NEG	16637983
82	Virginiaebutanolide C	C11H20O4	11.2322	215.128	NEG	40565489
83	8,9-Didehydro-7-hydroxydolichodial	C10H12O3	13.1663	163.075	POS	3062370
84	13-Hydroxygermacrone	C15H22O2	12.962	235.169	POS	10399140
85	4'-Hydroxy-2-O-methylanigorufone	C20H14O3	12.0983	301.087	NEG	71358480
86	hypoxanthine	C5H4N4O	4.25645	137.046	POS	135398638
87	Clostebol acetate	C21H29ClO3	1.07912	401.129	NEG	13327
88	5-Methoxypiperonal	C9H8O4	13.3545	181.049	POS	22016
89	Mandelic acid	C8H8O3	9.69907	151.039	NEG	1292
90	Daphnetin	C9H6O4	7.56217	177.019	NEG	5280569
91	1-Phenyl-2-propanol	C9H12O	12.3775	119.086	POS	94185
92	7-Aminocephalosporanic acid	C10H12N2O5S	15.0624	305.08	POS	441328
93	2-C-Methyl-D-erythrono-1,4-lactone	C5H8O4	1.25603	133.05	POS	11126294
94	Hydroxyanigorufone	C19H12O3	11.9101	287.071	NEG	11471752
95	Cucumegastigmane I	C13H20O4	10.0133	241.143	POS	16105430
96	Homononactinic acid	C11H20O4	9.77442	181.122	POS	10889304
97	1-(3,4-Dihydroxyphenyl)-7-(4-hydroxyphenyl)-4-hept	C19H20O4	11.1821	295.132	POS	11570978
98	Ginsenoside Re	C48H82O18	10.4511	969.537	POS	441921
99	5-Hydroxy-2-methylchromone	C10H8O3	7.74852	177.054	POS	821390
100	Bisdemethoxycurcumin	C19H16O4	12.0601	309.111	POS	5315472
101	L-glutamic acid	C5H9NO4	1.34633	148.06	POS	33032
102	Puerol A	C17H14O5	10.4105	279.066	NEG	14691941
103	p-Hydroxy-5,6-dehydrokawain	C14H12O4	10.2896	225.055	NEG	10243535
104	Shikimic Acid	C7H10O5	6.84688	173.045	NEG	8742
105	2-Hydroxypalmitic acid	C16H32O3	14.7362	271.228	NEG	92836
106	ent-14,15-Dinor-13-oxolabda-8(17),11-dien-18-oic acid	C18H26O3	10.274	308.221	POS	91885074
107	Enalin A	C10H10O4	6.80658	177.054	POS	12084864
108	Mercaptobenzothiazole	C7H5NS2	9.90458	167.994	POS	697993
109	Acetylglycine	C4H7NO3	0.892367	159.076	POS	10972
110	Inosine	C10H12N4O5	2.54663	267.073	NEG	135398641
111	Protocatechualdehyde	C7H6O3	6.32808	139.039	POS	8768
112	5-Methyl-7-methoxyisoflavone	C17H14O3	11.2186	231.08	POS	2734290
113	p-Hydroxybenzaldehyde	C7H6O2	7.2873	123.044	POS	126
114	3-Hydroxyperillaldehyde	C10H14O2	8.34665	149.096	POS	85247137
115	trans-3-Indoleacrylic acid	C11H8NO2	8.67542	207.029	NEG	5375048
116	Picrotoxinin	C15H16O6	9.54452	273.077	NEG	442292
117	7-Methoxy-1-naphthaleneacetic acid	C13H12O3	8.29018	197.06	NEG	6862
118	(-)-Epicatechin	C15H14O6	6.45077	291.086	POS	72276
119	Syringic acid	C9H10O5	7.49718	197.045	NEG	10742
120	5-Acetylsalicylic acid	C9H8O4	6.69053	181.049	POS	83151
121	Isoderrone	C20H16O5	13.2594	317.081	NEG	14237660
122	Dihydrosesamin	C20H20O6	9.29745	355.118	NEG	10871980
123	Clausine I	C14H10NO3	14.0456	239.059	NEG	10657725
124	Esculetin	C9H6O4	7.54812	179.034	POS	5281416
125	Isosclerone	C10H10O3	7.23063	196.097	POS	13369486
126	artemisinin	C15H22O5	8.9257	300.18	POS	68827
127	Deacetylorientalide	C19H22O7	10.8113	401.099	POS	23815409
128	Glycolaldehyde dimer	C4H8O4	1.20528	103.039	POS	186078
129	Isopsoralen	C11H6O3	8.62207	187.039	POS	10658
130	Cleroindicin B	C8H14O3	6.67805	141.091	POS	184824
131	1-Hydroxypyrene	C16H10O	12.3681	263.071	NEG	21387
132	Bergapten	C12H8O4	10.4395	261.04	NEG	2355
133	L-allo-Threonine	C4H9NO3	0.904233	120.066	POS	99289
134	Resedine	C9H9NO2	8.62207	146.06	POS	202193
135	Armillarisin A	C12H10O5	6.69642	279.051	NEG	5320192
136	Magnolioside	C16H18O9	8.9257	319.081	POS	3084335
137	Ethyl alpha-D-apiofuranoside	C7H14O5	1.36692	161.081	POS	-
138	Justicidin A	C22H18O7	11.2867	375.087	NEG	159982
139	Artemisinic acid	C15H22O2	12.1719	235.169	POS	10922465
140	3-Hydroxy-p-menth-1-en-6-one	C10H16O2	11.679	151.112	POS	14106048
141	Coniferaldehyde	C10H10O3	8.68153	179.07	POS	5280536
142	4-Hydroxycinnamic acid	C9H8O3	6.44783	163.039	NEG	637542
143	3-Hydroxymethylenetanshinquinone	C18H14O4	11.468	339.087	NEG	5318290
144	2-Adamantanone	C10H14O	8.7927	195.102	NEG	64151
145	N-a-Acetyl-L-arginine	C8H16N4O3	1.29593	280.138	POS	67427
146	4-Oxododecanedioic acid	C12H20O5	10.0201	225.113	NEG	13213508
147	Kumatakenin	C17H14O6	7.88823	337.07	POS	5318869
148	Ethyl alpha-D-ribo-hex-3-ulopyranoside	C8H14O6	6.81903	171.065	POS	-
149	Irisflorentin	C20H18O8	8.31182	369.096	POS	170569
150	trans-2-Tridecene-1,13-dioic acid	C13H22O4	11.9772	241.144	NEG	23091819
151	Ochratoxin B	C20H19NO6	6.92805	370.127	POS	20966
152	11-Hydroxyjasmonic acid	C12H18O4	9.25173	259.154	POS	15127090
153	1-Oxo-4-hydroxy-2-en-4-ethylcyclohexa-5,8-olide	C8H8O4	2.82388	186.076	POS	85844078
154	Kigelinone	C19H16O4	11.2867	289.087	NEG	442752
155	Taiwapyrone	C10H14O4	8.95033	163.075	POS	101316864
156	Calystegine B2	C7H13NO4	1.2434	140.071	POS	124434
157	piperic acid	C12H10O4	8.1565	199.039	NEG	5370536
158	Perilloxin	C16H18O4	12.0185	313.083	POS	10468570
159	Ethyl vanillin acetate	C11H12O4	8.67542	207.066	NEG	155708
160	6-Demethoxycleomiscosin A	C19H16O7	9.2355	401.087	NEG	134715065
161	cinnamaldehyde	C9H8O	10.9972	133.065	POS	637511
162	Phyllanthurinolactone	C14H18O8	8.0706	353.065	POS	10957981
163	Asarylaldehyde	C10H12O4	7.27542	197.081	POS	20525
164	Noroxyhydrastinine	C10H9NO3	7.58243	236.056	NEG	89047
165	2-Oxo-3-phenylpropanoic acid	C9H8O3	6.50763	147.044	POS	997
166	N-Acetylleucine	C8H15NO3	7.92373	174.112	POS	70912
167	Citrusinol	C20H16O6	10.3603	317.08	POS	44259051
168	2-O-Methylanigorufone	C20H14O2	11.5181	269.096	POS	10085389
169	Verminoside	C24H28O13	8.26455	569.125	POS	12000883
170	Bergaptol	C11H6O4	9.04418	247.024	NEG	5280371
171	Retusin	C19H18O7	9.28967	341.101	POS	5352005
172	1,6-Dioxaspiro[4.5]decan-2-methanol	C9H16O3	8.65193	217.108	NEG	588029
173	P-Anisic acid	C8H8O3	7.56217	151.039	NEG	7478
174	Methyl hexadecanoate	C17H34O2	13.1994	315.253	NEG	8181
175	1-Linoleoyl-sn-glycero-3-phosphorylcholine	C26H50NO7P	14.1884	520.339	POS	11005824
176	3-O-Acetylpinobanksin	C17H14O6	7.48858	337.07	POS	148556
177	Narchinol B	C12H16O3	8.7668	191.106	POS	56835095
178	Furanofukinin	C16H24O2	12.1883	293.176	NEG	78385403
179	6-O-Ethyltetradymodiol	C17H26O3	11.8219	323.185	NEG	162984443
180	Przewaquinone C	C18H16O4	12.1848	261.091	POS	126071
181	linolenic acid	C18H30O2	13.9053	311.257	POS	5280934
182	Cearoin	C14H12O4	11.0412	225.056	NEG	3938139
183	5-O-Cinnamoylquinic acid	C16H18O7	8.97287	345.096	POS	162642276
184	Kaempferol 3,4',7-triacetate	C21H16O9	8.83955	445.111	POS	44584293
185	Rengynic acid	C8H14O4	7.78273	139.075	POS	54033324
186	m-Digallic acid	C14H10O9	9.91892	303.014	NEG	341
187	(E)-Cinnamic acid	C9H8O2	8.50797	147.044	NEG	444539
188	Dihydrocoriandrin	C13H12O4	8.63895	213.055	NEG	14134311
189	Senkyunolide I	C12H16O4	7.769	223.097	NEG	11521428
190	Isopentyl b-D-glucoside	C11H22O6	10.0844	215.128	POS	10848285
191	Isovanillic acid	C8H8O4	4.39025	213.04	NEG	12575
192	(+)-catechin	C15H14O6	6.44783	289.072	NEG	9064
193	Panasenoside	C27H30O16	7.24215	611.16	POS	9986191
194	prim-O-Glucosylangelicain	C21H26O11	8.87942	499.12	POS	91895378
195	2-Hydroxy Hippuric Acid	C9H9NO4	4.37175	213.087	POS	10253
196	Radicicol	C18H17ClO6	11.3032	385.047	NEG	6323491
197	ophiopogonone A	C18H14O6	10.8943	349.07	POS	10087732
198	Cryptochlorogenic acid	C16H18O9	7.34005	335.077	NEG	9798666
199	Dehydrologanin	C17H24O10	10.2523	423.108	NEG	11968402
200	Buspirone free base	C21H31N5O2	13.0266	427.281	POS	2477
201	Sterebin A	C18H30O4	11.8094	309.207	NEG	21681091
202	D-Aspartic acid	C4H7NO4	0.89615	134.045	POS	83887
203	D-Serine	C3H7NO3	0.89615	147.076	POS	71077
204	(2RS)-Lotaustralin	C11H19NO6	3.77142	294.154	POS	441467
205	2-Pentadecenedioic acid	C15H26O4	12.5196	251.165	NEG	12867460
206	Cordycepin	C10H13N5O3	4.201	252.109	POS	6303
207	16-[(aminocarbonyl)hydrazono]stachan-18-oic acid	C21H33N3O3	14.5412	376.259	POS	5433982
208	8-Methoxybonducellin	C18H16O5	8.90047	357.098	NEG	73353608
209	ellagic acid	C14H6O8	9.37135	300.999	NEG	5281855
210	Psoromic acid	C18H14O8	7.53578	323.054	POS	23725
211	Glepidotin B	C20H20O5	11.4382	321.113	NEG	442411
212	L-TYROSINE	C9H11NO3	2.16597	180.066	NEG	6057
213	Dianthoside	C12H16O8	1.2148	306.118	POS	5316639
214	7-Methoxycoumarin	C10H8O3	10.111	221.045	NEG	10748
215	L-Pyroglutamic acid	C5H7NO3	1.44717	257.077	NEG	7405
216	Guanine	C5H5N5O	1.87932	150.041	NEG	135398634
217	4-Hydroxybenzaldehyde rhamnoside	C13H16O6	5.91385	286.128	POS	11777785
218	[12]-Dehydrogingerdione	C23H34O4	11.7569	438.263	POS	154791045
219	Isoorientin	C21H20O11	8.23087	447.093	NEG	114776
220	Equisetin	C22H31NO4	14.3327	372.217	NEG	54684703
221	2,6-Diaminoheptanedioic acid	C7H14N2O4	1.0095	191.102	POS	865
222	1-(4-Hydroxy-2,2-dimethylchroman-6-yl)ethanone	C13H16O3	12.724	221.117	POS	129887823
223	Damascenone	C13H18O	10.5097	173.133	POS	5366074
224	Eupatoriochromene	C13H14O3	9.03387	219.101	POS	100768
225	Phellolactone	C13H14O8	6.74798	281.065	POS	102004720
226	Citrate	C6H8O7	3.69852	210.061	POS	31348
227	Nordalbergin	C15H10O4	9.4875	255.065	POS	5320203
228	Massarilactone B	C11H14O5	7.7023	207.066	NEG	10105097
229	Syringaldehyde	C9H10O4	7.94097	181.05	NEG	8655
230	(-)-Gallocatechin	C15H14O7	5.20318	307.08	POS	9882981
231	Curdione	C15H24O2	4.57222	259.165	POS	6441391
232	Echioidinin	C16H12O5	9.26442	285.075	POS	15559079
233	5-deoxy Thymidine	C10H14N2O4	5.52852	209.092	POS	65120
234	Crotanecine	C8H13NO3	1.29593	213.123	POS	394146
235	N-Acetyl-L-aspartic acid	C6H9NO5	1.2783	158.045	POS	65065
236	Teuvincenone H	C20H20O6	10.5506	337.108	NEG	50899164
237	13,14,15,16-Tetranor-8(17)-labden-12-oic acid	C16H26O2	12.5317	295.191	NEG	14380023
238	N-Acetyl-phenylalanine	C11H13NO3	8.27458	206.082	NEG	74839
239	Mearnsetin	C16H12O8	10.0879	313.035	NEG	10359384
240	Benzoylphenylalanine	C16H15NO3	10.5506	268.098	NEG	97370
241	Sarmentosin	C11H17NO7	1.54852	240.086	POS	5281123
242	ethyl 2-(1-hydroxy-4-oxocyclohexa-2,5-dien-1-yl)acetate	C10H12O4	7.239	195.065	NEG	100323
243	norepinephrine	C8H11NO3	4.57862	214.071	NEG	439260
244	Leucanthogenin	C17H14O8	7.44112	347.075	POS	15224752
245	27-O-acetyl-withaferin A	C31H42O6	12.1599	552.33	POS	57328756
246	6-Shogaol	C17H24O3	12.5792	259.167	POS	5281794
247	baicalein	C15H10O5	8.80162	271.06	POS	5281605
248	1-Methylinosine	C11H14N4O5	7.83975	317.066	NEG	65095
249	xanthosine	C10H12N4O6	4.19797	283.068	NEG	64959
250	Eucamalol	C10H16O2	10.297	213.113	NEG	12426239
251	(+)-Mellein	C10H10O3	8.67542	177.055	NEG	28516
252	VERATRIC ACID	C9H10O4	8.54713	181.05	NEG	7121
253	Anigorufone	C19H12O2	9.86903	273.09	POS	636472
254	falcarindiol	C17H24O2	12.59	261.183	POS	5281148
255	Eriodictyol	C15H12O6	5.19178	289.07	POS	440735
256	Saropyrone	C16H16O5	8.87263	287.092	NEG	10401833
257	D-altrofurano-heptulose-3	C7H14O7	0.950283	245.043	NEG	145865405
258	Furomollugin	C14H10O4	9.02685	287.056	NEG	10354359
259	Monotropein	C16H22O11	6.27857	413.107	POS	73466
260	Pedatisectine F	C9H14N2O4	3.52483	215.102	POS	12285902
261	Emodin-8-O-beta-gentiobioside	C27H30O15	7.60165	593.151	NEG	71587230
262	Desmethylbellidifolin	C13H8O6	10.1628	259.024	NEG	5281626
263	3-Hydroxy-L-tyrosine	C9H11NO4	6.64128	180.065	POS	6047
264	meso-dihydroguaiaretic acid	C20H26O4	12.5062	353.169	POS	476856
265	7,8-Dihydrokawain-5-ol	C14H16O4	12.2655	287.068	POS	10944777
266	Verbasoside	C20H30O12	7.6079	485.162	POS	11754080
267	Traumatic Acid	C12H20O4	11.8573	227.128	NEG	5283028
268	2-Hydroxy-4-methoxybenzaldehyde	C8H8O3	6.72477	185.081	POS	69600
269	Tinospin E	C20H20O6	11.7035	321.111	POS	71473355
270	Robinetin	C15H10O7	8.9257	303.049	POS	5281692
271	Hydrourushiol	C21H36O2	13.1335	365.269	NEG	68118
272	2,4-Dihydroxy-6-methoxy-3-formylacetophenone	C10H10O5	6.28077	255.051	NEG	610933
273	Monocillinol B	C11H13NO5	6.21608	240.086	POS	10060146
274	Phenylacetylglycine	C10H11NO3	8.11208	174.055	NEG	68144
275	3,7-Di-O-methylquercetin	C17H14O7	8.74932	311.056	NEG	5280417
276	Ophiopogonanone A	C18H16O6	7.30912	311.091	POS	9996586
277	1,2-Dihydrotanshinquinone	C18H14O3	11.1357	243.08	POS	105119
278	3-O-Acetylpadmatin	C18H16O8	8.85637	343.08	POS	10406203
279	Neposide	C19H22O8	8.32607	359.114	NEG	12313291
280	Gymnestrogenin	C30H50O5	13.8114	513.354	POS	15560302
281	Isoboonein	C9H14O3	5.5767	215.092	NEG	10899112
282	Methyl asterrate	C18H18O8	9.19063	327.085	POS	5249326
283	Methyl 2-(2-hydroxyphenyl)acetate	C9H10O3	8.0826	208.097	POS	89719
284	Hydroprotopine	C20H20NO5+	8.99693	377.12	POS	14140130
285	Praeruptorin A	C21H22O7	9.00895	409.125	POS	38347607
286	Cynaroside	C21H20O11	9.83648	447.093	NEG	5280637
287	9-Hydroxy-a-lapachone	C15H14O4	7.74192	303.087	NEG	5320006
288	Sinapinic acid	C11H12O5	9.2355	447.129	NEG	637775
289	4′′,5′′-dehydroisopsoralidin	C20H14O5	12.2256	333.076	NEG	155289784
290	(E)-Cinnamyl Acetate	C11H12O2	12.2873	194.117	POS	5282110
291	2-Methoxystypandrone	C14H12O5	8.6896	259.061	NEG	158739
292	Axillaridine	C18H27NO6	13.6027	371.217	POS	179398
293	Methyl ferulate	C11H12O4	8.39453	253.071	NEG	5357283
294	Alpha-Asarone	C12H16O3	11.1687	253.108	NEG	636822
295	7-hydroxy-4-methyl-8-nitrocoumarin	C10H7NO5	0.8362	242.007	NEG	5376327
296	Eupalinilide B	C20H24O6	8.74163	361.161	POS	11245337
297	gamma-Linolenic acid	C18H30O2	13.8062	323.222	NEG	5280933
298	Demethoxycurcumin	C20H18O5	12.0932	339.122	POS	5469424
299	Kaempferol 3-glucoside 7-rhamnoside	C27H30O15	7.596	595.165	POS	57390614
300	Nardosinone	C15H22O3	10.2516	273.146	POS	168136
301	3'-hydroxyPuerarin	C21H20O10	8.75383	433.112	POS	5748205
302	Isofraxoside	C16H18O10	11.2325	393.081	POS	11508953
303	3-O-Ethyl-L-ascorbic acid	C8H12O6	5.88783	185.045	NEG	150736
304	2-Methoxynaphthoquinone	C11H8O3	8.95198	233.045	NEG	16871
305	1,2-Didehydrocryptotanshinone	C19H18O3	11.3834	339.123	NEG	102004793
306	Naringenin-7-O-beta-D-glucuronide	C21H20O11	8.22985	449.107	POS	15540754
307	10-Gingerol	C21H34O4	12.8309	373.234	POS	168115
308	Scopolin	C16H18O9	7.3436	377.083	POS	439514
309	4-(cis)-Acetyl-3,6,8-trihydroxy-3-methyldihydronaphthalenone	C13H14O5	9.13597	231.066	NEG	10777052
310	chrysin	C15H10O4	10.9541	253.05	NEG	5281607
311	Dehydroeffusol	C17H14O2	10.4395	249.092	NEG	5316810
312	Tutin	C15H18O6	7.73748	259.096	POS	75729
313	Scillascillin	C17H12O6	8.23087	357.061	NEG	75492722
314	Purpurogallin	C11H8O5	6.08773	221.043	POS	135403797
315	Neolancerin	C19H18O10	8.08703	451.088	NEG	92029590
316	Lamiophlomiol A	C11H14O6	7.28933	241.071	NEG	125923
317	Atractylenolide II	C15H20O2	13.5906	277.144	NEG	14448070
318	Tanshindiol A	C18H16O5	9.75508	293.081	NEG	16730071
319	Erigoster B	C26H24O13	9.32113	565.096	NEG	125181709
320	Jangomolide	C26H28O8	9.43553	489.155	NEG	14240958
321	Alizarin	C14H8O4	7.47003	285.04	NEG	6293
322	Isoanhydroicaritin	C21H20O6	9.9648	369.131	POS	5322079
323	Procyanidin B1	C30H26O12	6.54478	577.135	NEG	11250133
324	Viscidulin I	C15H10O7	9.04418	301.035	NEG	5320471
325	3-O-Debenzoylzeylenone	C14H14O6	5.34688	323.077	NEG	122184806
326	3,4-Dihydroxy-2-O-methylanigorufone	C20H14O4	13.0687	301.085	POS	125115445
327	Europine N-oxide	C16H27NO7	8.66857	346.187	POS	323256
328	docosapentaenoic acid	C22H34O2	13.6246	375.228	POS	5497182
329	Isofraxidin	C11H10O5	8.78978	264.086	POS	5318565
330	Paeoniflorigenone	C17H18O6	9.90458	301.106	POS	70698143
331	Axillarin	C17H14O8	8.2254	327.05	NEG	5281603
332	Erythrinin G	C20H18O6	11.5676	335.092	NEG	133561644
333	Brevifolincarboxylic acid	C13H8O8	7.24215	293.029	POS	9838995
334	17-Hydroxyisolathyrol	C20H30O5	11.7708	349.199	NEG	127256191
335	Inulicin	C17H24O5	9.50995	350.196	POS	75528891
336	Clausenin	C14H12O5	9.98157	241.05	NEG	5315948
337	Ethyl brevifolincarboxylate	C15H12O8	12.3573	338.087	POS	5487248
338	Meridinol	C20H18O7	9.66718	353.101	POS	11079164
339	Crotaleschenine	C16H23NO5	7.01168	274.143	POS	21573658
340	Sanggenone K	C30H32O6	11.0239	471.219	POS	44258299
341	Norwogonin-8-O-glucuronide	C21H18O11	11.4612	427.066	NEG	14180785
342	Esculin	C15H16O9	6.26793	339.072	NEG	5281417
343	8-Acetyl-7-Hydroxycoumarin	C11H8O4	5.1976	249.04	NEG	5411574
344	3-Methyladipic acid	C7H12O4	6.33727	205.071	NEG	12292
345	Tanshindiol B	C18H16O5	10.631	293.082	NEG	5321620
346	Dihydrophaseic acid	C15H22O5	7.6913	300.18	POS	11988272
347	Coriandrin	C13H10O4	6.94063	229.05	NEG	119586
348	L-Aspartic Acid 4-Benzyl Ester	C11H13NO4	4.86712	222.077	NEG	101186
349	Cryptomoscatone D2	C17H20O4	13.0909	327.098	POS	76524569
350	LINAMARIN	C10H17NO6	1.30442	289.139	POS	11128
351	Quercimeritrin	C21H20O12	7.65782	463.088	NEG	5282160
352	Acetyl-11-keto-Beta-boswellic acid	C32H48O5	12.6016	513.354	POS	9847548
353	Pterodondiol	C15H28O2	13.4973	285.207	NEG	10879263
354	Flavin mononucleotide	C17H19N4O6	13.1331	393.166	POS	643976
355	Isopimpinellin	C13H10O5	9.35932	227.034	NEG	68079
356	Cleroindicin F	C8H10O3	6.4965	119.049	POS	10374646
357	Isovitexin	C21H20O10	8.75497	431.098	NEG	162350
358	1-(4-Hydroxybenzoyl)glucose	C13H16O8	4.61472	345.082	NEG	14132342
359	Demethylwedelolactone	C15H8O7	9.03855	299.019	NEG	5489605
360	5-Hydroxy-7-acetoxyflavone	C17H12O5	8.74932	341.066	NEG	5420895
361	Irilone	C16H10O6	8.93905	343.045	NEG	5281779
362	threo-1-C-Syringylglycerol	C11H16O6	6.45552	227.091	POS	75492726
363	Ruscogenin	C27H42O4	13.5238	453.297	POS	441893
364	Alisol F	C30H48O5	13.4771	511.339	POS	76310822
365	Obscuraminol E	C16H33NO	14.845	288.289	POS	134715064
366	Bergaptol glucoside	C17H16O9	10.5424	329.065	POS	2285981
367	Koaburaside	C14H20O9	11.7226	367.082	NEG	5318820
368	Peucedanol	C14H16O5	9.43772	247.094	POS	15296614
369	(-)-Epigallocatechin	C15H14O7	5.19143	305.066	NEG	10425234
370	Nortanshinone	C17H12O4	10.9153	325.071	NEG	10062187
371	3-O-Methylanhydrotuberosin	C21H18O4	13.0266	379.091	POS	23276528
372	5-Dehydroxyparatocarpin K	C20H18O4	12.5317	303.102	NEG	11515298
373	emodin	C15H10O5	13.4199	269.045	NEG	3220
374	5alpha-Hydroxychloranthalactone A	C15H16O3	7.74852	286.143	POS	131857139
375	Astraganoside	C23H28O11	10.7746	481.17	POS	134715187
376	Protoescigenin	C30H50O6	13.4661	529.349	POS	15560300
377	Lupinalbin A	C15H8O6	10.2354	329.03	NEG	5324349
378	3,7-O-Diacetylpinobanksin	C19H16O7	8.85637	357.096	POS	91884891
379	Aurantiamide	C25H26N2O3	12.2958	383.176	NEG	185904
380	11S,12-Dihydroxyspirovetiv-1(10)-en-2-one	C15H24O3	12.6251	251.165	NEG	15385559
381	Plumieride	C21H26O12	8.85855	491.119	NEG	72319
382	Indican	C14H16NO6	5.70493	339.068	POS	441564
383	Pterosin C	C14H18O3	9.35932	279.123	NEG	186209
384	Gardoside	C16H22O10	10.0252	339.107	POS	46173850
385	Sec-O-Glucosylhamaudol	C21H26O10	9.30055	439.159	POS	10478277
386	Coixol	C8H7NO3	4.4088	210.04	NEG	10772
387	Kirenol	C20H34O4	13.6478	339.25	POS	15736732
388	Cyclo(Tyr-Hpro)	C14H16N2O4	7.67993	241.097	POS	102004913
389	Ethyl gallate	C9H10O5	7.97633	197.045	NEG	13250
390	Daidzein diacetate	C19H14O6	12.0152	319.061	NEG	10359753
391	Ethyl 3,4-dihydroxybenzoate	C9H10O4	9.19825	181.05	NEG	77547
392	Caftaric acid	C13H12O9	7.12433	277.034	POS	6440397
393	Gastrodin	C13H18O7	6.59073	309.094	POS	115067
394	Cyclo(Tyr-Gly)	C11H12N2O3	5.04282	221.092	POS	138604
395	Piceoside	C14H18O7	8.99693	281.101	POS	92123
396	Mogrol	C30H52O4	13.846	499.375	POS	14525327
397	Cirsimaritin	C17H14O6	8.81507	297.075	POS	188323
398	Erigeroside	C11H14O8	5.45405	255.051	NEG	162876
399	Chrysin 6-C-arabinoside 8-C-glucoside	C26H28O13	9.47475	549.159	POS	21722007
400	Sanggenone H	C20H18O6	12.1145	319.096	POS	90681446
401	1-Oleoyl-sn-glycero-3-phosphocholine	C26H52NO7P	14.4328	522.354	POS	16081932
402	Loureiriol	C16H14O6	8.74163	303.086	POS	11722425
403	Xanthotoxol	C11H6O4	5.23482	247.024	NEG	65090
404	2-Prenylhydroquinone-1-glucoside	C17H24O7	8.59642	361.127	NEG	-
405	Glycyrrhiza flavonol A	C20H18O7	9.34655	415.103	NEG	5317765
406	Deoxyinosine	C10H11N4O4	4.44622	269.113	POS	135398593
407	ETHYL CAFFEATE	C11H12O4	10.126	207.066	NEG	5317238
408	Quinaldic acid	C10H7NO2	7.03752	215.081	POS	7124
409	3,5-Dihydroxy-4-methoxybenzoic acid	C8H8O5	8.06227	183.029	NEG	78016
410	Erythbidin A	C20H20O4	11.6875	323.128	NEG	15391906
411	11alpha,12alpha-Epoxy-3beta,23-dihydroxy-30-norolean-20(29)-en-28,13beta-olide	C29H42O6	11.9437	504.331	POS	70698158
412	Securiterpenoside	C11H18O8	1.15283	296.133	POS	5321222
413	Hamaudol	C15H16O5	11.4838	241.086	POS	164722
414	Juglanin	C20H18O10	8.6896	417.082	NEG	5318717
415	Parthenocissin A	C28H22O6	10.5313	455.148	POS	15411553
416	cafestol	C20H28O3	12.3775	299.197	POS	108052
417	Kaempferol-3-O-galactoside	C21H20O11	9.08472	447.093	NEG	5282149
418	8-O-Acetyltorilolone	C17H26O4	12.9439	293.176	NEG	100932311
419	Secoxyloganin methyl ester	C18H26O11	8.1435	383.133	POS	14105070
420	N-Acetyl-Neuraminic Acid	C11H19NO9	1.67372	290.088	NEG	439197
421	Diderroside	C19H28O13	8.93905	501.103	NEG	23760099
422	Diosmetin	C16H12O6	9.38647	301.07	POS	5281612
423	4''-methyloxy-Genistin	C22H22O10	8.81653	445.114	NEG	71621984
424	2-(-D-Glucopyranosyloxy)-4-hydroxybenzenepropanoi	C15H20O9	8.34665	309.096	POS	11427899
425	5-Hydroxy-6,7-dimethoxylflavone	C17H14O5	8.95033	331.117	POS	471722
426	Pantoyllactone glucoside	C12H20O8	7.67993	257.101	POS	14701560
427	Damnacanthol	C16H12O5	7.83018	317.101	POS	160474
428	quercetin	C15H10O7	8.69498	303.049	POS	5280343
429	Hydroxygenkwanin	C16H12O6	11.1521	299.056	NEG	5318214
430	Wilforlide A	C30H46O3	14.6628	455.349	POS	158477
431	3,4-Dicaffeoylquinic acid	C25H24O12	8.93905	515.119	NEG	5281780
432	trans-Dehydrocurvularin	C16H18O5	6.53235	271.097	NEG	6438143
433	Axillarin 4'-glucuronide	C23H22O14	7.4826	503.083	NEG	21722022
434	Myricananin A	C20H24O5	9.2021	389.133	POS	25141365
435	6(1H)-Azulenone, 2,3-dihydro-1,4-dimethyl	C12H14O	10.4772	219.102	NEG	102004679
436	Mirificin	C26H28O13	9.47742	547.145	NEG	21676217
437	8alpha-Hydroxyhirsutinolide	C15H20O6	12.1145	261.112	POS	70690654
438	Oridonin	C20H28O6	13.4999	365.193	POS	5321010
439	4',5,7-Trihydroxy 3,3',6,8-tetramethoxyflavone	C19H18O9	7.596	355.08	POS	5386959
440	Vitexin 2''-O-beta-D-glucoside	C27H30O15	7.27542	595.165	POS	5280641
441	Diosmetin-7-O-Beta-D-glucopyranoside	C22H22O11	9.37387	463.122	POS	11016019
442	Ruberythric acid	C25H26O13	7.7216	579.135	NEG	92101
443	Fibraurin	C20H20O7	12.4083	407.092	NEG	21626387
444	Scutellarin methyl ester	C22H20O12	7.3684	475.088	NEG	14162695
445	Rhodiosin	C27H30O16	7.48858	633.141	POS	76959646
446	Gardenine	C11H13NO4	9.55687	258.053	NEG	197414
447	Ferulamide	C10H11NO3	6.19388	238.072	NEG	6433734
448	Artemitin	C20H20O8	8.40598	389.12	POS	5320351
449	Apigenin 7-O-methylglucuronide	C22H20O11	8.91185	459.093	NEG	13844658
450	Gentiopicroside	C16H20O9	8.22985	395.075	POS	88708
451	Chrysophanol 8-O-glucoside	C21H20O9	8.84793	461.109	NEG	442731
452	Huperzine A	C15H18N2O	9.09538	241.134	NEG	854026
453	Koenigine	C19H18NO3	9.84892	329.103	NEG	5318825
454	Methylmalonic acid	C4H6O4	5.22462	278.088	POS	487
455	Zeatin	C10H13N5O	6.60532	264.084	POS	449093
456	Verproside	C22H26O13	8.85132	463.123	POS	12000799
457	Rhodiocyanoside A	C11H17NO6	1.07655	301.139	POS	6442274
458	3,19-Dihydroxy-6,23-dioxo-12-ursen-28-oic acid	C30H44O6	12.1478	518.347	POS	15460490
459	Jasmonic acid	C12H18O3	8.53655	252.159	POS	5281166
460	Ursolic acid	C30H48O3	14.7354	457.367	POS	64945
461	(S)-Leucic acid	C6H12O3	0.868383	150.112	POS	83697
462	Luteolin 7-glucuronide	C21H18O12	9.50683	461.072	NEG	5282153
463	10-O-Coumaroyl-10-O-deacetylasperuloside	C25H26O12	8.03898	563.14	NEG	95224286
464	Jasminoside N	C22H38O11	10.5993	501.23	POS	101505270
465	Altholactone	C13H12O4	8.93905	277.071	NEG	442513
466	Morroniside	C17H26O11	8.1435	445.112	POS	11228693
467	Hispidulin	C16H12O6	10.4755	301.07	POS	5281628
468	Carpinontriol B	C19H20O6	9.63495	389.124	NEG	85374891
469	rac-Glycerol 1-myristate	C17H34O4	13.4199	323.22	NEG	79050
470	resveratrol	C14H12O3	8.9899	227.071	NEG	445154
471	Neoschaftoside	C26H28O14	7.7216	563.14	NEG	442619
472	2-O-Methyluridine	C10H14N2O6	0.989717	291.118	POS	102212
473	Odontoside	C20H22O11	9.43772	403.102	POS	5320735
474	Rubrofusarin-6-O-beta-D-gentiobioside	C27H32O15	8.71463	577.156	NEG	503733
475	Isoquercitrin	C21H20O12	9.01467	463.088	NEG	5280804
476	Skimmin	C15H16O8	8.34665	325.091	POS	99693
477	2-phenyl-4H-benzo[h]chromen-4-one	C19H12O2	12.5553	271.076	NEG	11790
478	4'-Methoxypuerarin	C22H22O9	9.82198	431.133	POS	5319486
479	Luteolin-3-O-beta-D-glucuronide	C21H18O12	8.87263	461.072	NEG	10253785
480	Comanthosid B	C23H22O12	9.38432	489.103	NEG	38362596
481	Afzelin	C21H20O10	10.046	431.098	NEG	5316673
482	Granatomycin E	C22H22O11	9.38432	461.109	NEG	132331203
483	Germanaism B	C23H22O11	7.58448	475.123	POS	57503926
484	Lupinol C	C20H18O7	8.81507	393.096	POS	24094131
485	20(S),24(R)-Ocotillol	C30H52O5	14.3222	515.37	POS	15886258
486	Iridin	C24H26O13	9.86903	523.144	POS	5281777
487	Jaborosalactone D	C28H40O6	10.8943	490.315	POS	268947
488	Thymolglucoside	C16H24O6	11.304	351.122	POS	88687
489	beta-Jonone	C13H20O	13.1054	237.149	NEG	638014
490	Evodol	C26H28O9	14.2124	529.142	POS	185481
491	kaempferol	C15H10O6	9.65668	287.054	POS	5280863
492	Ehretioside B	C14H17NO7	5.0677	312.107	POS	10425556
493	Tricin 7-O-glucuronide	C23H22O13	8.90047	505.098	NEG	101939793
494	Hispidulin 7-glucuronide	C22H20O12	8.44498	475.088	NEG	5318059
495	2,4-Dodecadienoic acid isobutylamide	C16H29NO	13.2998	296.197	POS	6443006
496	N-Vanillyldecanamide	C18H29NO3	10.1955	306.207	NEG	169252
497	Anonamine	C19H28NO7+	5.46903	446.201	POS	6441178
498	Isosaxalin	C16H16O6	6.43827	349.092	NEG	511359
499	Taxifoliol	C15H12O7	5.22863	303.051	NEG	439533
500	hesperetin	C16H14O6	5.71737	303.086	POS	72281
501	Quercetin 3-O-glucuronide	C21H18O13	9.03855	477.067	NEG	5274585
502	3-Chloro-1-(4-octylphenyl)-propanone	C17H25ClO	13.9667	263.157	POS	70700719
503	Alpinoid D	C20H20O3	11.3433	353.139	NEG	38363343
504	Niazirin	C14H17NO5	9.57185	302.099	POS	129556
505	L-LYSINE	C6H14N2O2	0.771	147.113	POS	5962
506	Rosin	C15H20O6	5.5183	314.159	POS	5280656
507	Prunasin	C14H17NO6	4.64413	337.139	POS	119033
508	(E)-6-O-(p-coumaroyl)scandoside methyl ester	C26H30O13	7.05588	595.167	NEG	145874216
509	Santin	C18H16O7	12.1848	345.098	POS	5281695
510	1-(3,4,5-Trihydroxypentanoyl)-alpha-carboline	C16H15N2O4	6.89207	363.118	POS	-
511	Dihydrolycorine	C16H19NO4	6.17932	290.138	POS	11876135
512	Tetillapyrone	C11H14O6	1.56085	260.112	POS	11010113
513	visamminol-3'-O- glucoside	C21H26O10	9.85622	437.145	NEG	163358503
514	Isorhamnetin	C16H12O7	11.538	315.051	NEG	5281654
515	Altamisic acid	C15H20O5	10.3507	261.113	NEG	15143694
516	Dihydrocitrinone	C13H14O6	7.25158	330.094	POS	163095
517	Trifolirhizin	C22H22O10	8.1316	469.112	POS	442827
518	N-(1-Carboxy-2-phenylethyl)glutamine	C14H18N2O5	6.53235	293.114	NEG	558649
519	Diacetylpiptocarphol	C19H24O9	9.67752	397.149	POS	102004563
520	p-Coumaric Acid Ethyl Ester	C11H12O3	10.8588	191.071	NEG	676946
521	Syringin	C17H24O9	7.3684	371.134	NEG	5316860
522	Melittoside	C21H32O15	7.75988	563.139	POS	11968737
523	Juncuenin D	C18H18O3	10.463	327.097	POS	44178856
524	5-Galloylquinic acid	C14H16O10	3.93162	345.081	POS	14520970
525	EURYCOMANONE	C20H24O9	12.6636	373.127	POS	13936691
526	8-Glucosyl-5,7-dihydroxy-2-isopropylchromone	C18H22O9	8.92608	381.119	NEG	5317688
527	Eupatorin	C18H16O7	12.3468	345.096	POS	97214
528	Cyanidin-3-O-glucoside chloride	C21H21ClO11	9.83215	449.107	POS	197081
529	Aurantio-obtusin Beta-D-glucoside	C23H24O12	9.37387	493.133	POS	442725
530	2-Ethyl-3-methylmaleimide N-alpha-D-glucopyranoside	C13H19NO7	0.876733	319.149	POS	-
531	Cedrin	C16H14O8	9.90458	317.065	POS	21721881
532	Arteannuin B	C15H20O3	4.12813	271.128	POS	6543478
533	Endocrocin	C16H10O7	11.4809	313.035	NEG	160483
534	Feruloylputrescine	C14H20N2O3	6.26793	263.14	NEG	5281796

## Sheet: Sheet2
classB	count
Other compounds	172
Flavonoids	66
Prenol lipids	54
Organooxygen compounds	50
Carboxylic acids and derivatives	34
Coumarins and derivatives	28
Fatty Acyls	23
Benzene and substituted derivatives	21
Isoflavonoids	18
Cinnamic acids and derivatives	16
Phenols	12
Benzopyrans	11
Anthracenes	8
Diarylheptanoids	7
Purine nucleosides	7
Steroids and steroid derivatives	7
